# Supplementary material for: Embryo and larval biology of the deep-sea octocoral Dentomuricea aff. meteor under different temperature regimes
Source: PeerJ journal article supplement (doi:10.7717/peerj.11604), 2021-08-02

13°C

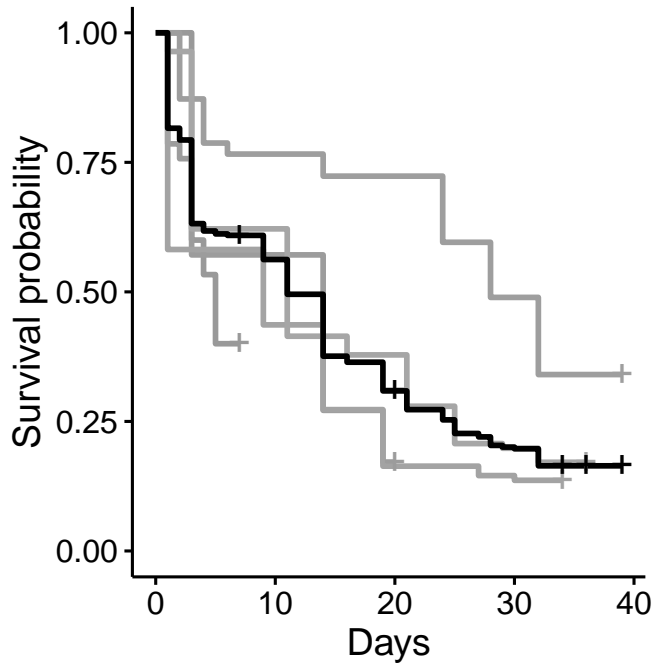

15°C

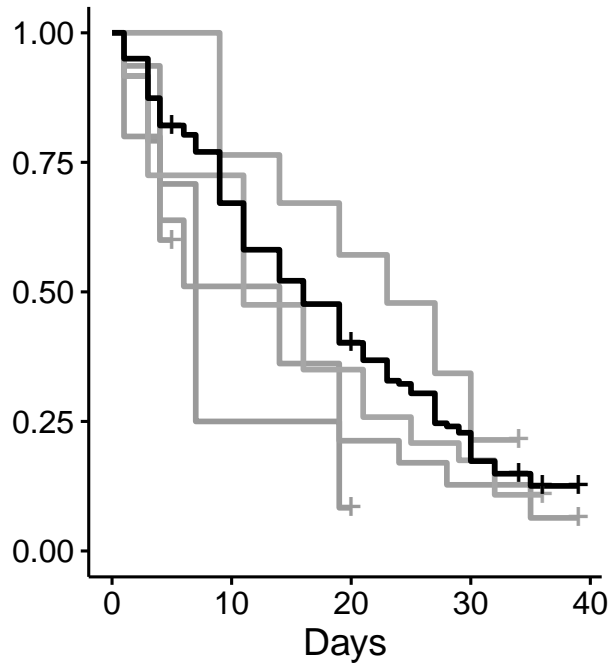

Supplement: FigureS2.pdf [file FigureS2.pdf]
