# Supplementary material for: Embryo and larval biology of the deep-sea octocoral Dentomuricea aff. meteor under different temperature regimes
Source: PeerJ. 2021 Aug 2;9:e11604. doi: 10.7717/peerj.11604 (PMC8340903; doi:10.7717/peerj.11604)
Supplement: Supplemental Information 2 — Dataset provided for the reviewing process, in combination with the provided code. Includes four sheets corresponding to collected data for embryo development, survival, larval stages and swimming behaviour. [file peerj-09-11604-s002.xlsx]

## Sheet: EmbryoDevelopment
Batch	Temperature	Date	Hour	HourFromSpawn	larvae	Pic	Stage	Stage2	Diameter(small)	Diameter(big)
1	13	2019-11-27	11	1	1	001	8-cell	8-cell
1	13	2019-11-27	11	1	1	002
1	13	2019-11-27	11	1	2	003-004	8-cell	8-cell
1	13	2019-11-27	11	1	3	005	2-cell	2-cell
1	13	2019-11-27	11	1	4	006	fertilized egg	fertilized egg
1	13	2019-11-27	11	1	5	007	fertilized egg	fertilized egg
1	13	2019-11-27	11	1	6	008-0013	8-cell	8-cell
1	13	2019-11-27	12	2	1	0014	fertilized egg	fertilized egg
1	13	2019-11-27	12	2	2	0015	fertilized egg	fertilized egg
1	13	2019-11-27	12	2	3	0016	fertilized egg	fertilized egg
1	13	2019-11-27	12	2	4	0017	fertilized egg	fertilized egg
1	13	2019-11-27	12	2	5	0018	8-cell	8-cell
1	13	2019-11-27	12	2	6	0019	fertilized egg	fertilized egg
1	13	2019-11-27	12	2	7	0020-0021	32-cell	32-cell
1	13	2019-11-27	12	2	8	0022	32-cell	32-cell
1	13	2019-11-27	12	2	9	0023	fertilized egg	fertilized egg
1	13	2019-11-27	12	2	10	0024	32-cell	32-cell
1	13	2019-11-27	12	2	11	0025	8-cell	8-cell
1	13	2019-11-27	12	2	12	0026	fertilized egg	fertilized egg
1	13	2019-11-27	14	4	1	001	prawn chip	blastula
1	13	2019-11-27	14	4	2	002	fertilized egg	fertilized egg
1	13	2019-11-27	14	4	3	003	4-cell	4-cell
1	13	2019-11-27	14	4	4	004
1	13	2019-11-27	14	4	5	005	2-cell	2-cell
1	13	2019-11-27	14	4	6	006	2-cell	2-cell
1	13	2019-11-27	14	4	7	007-008	32-cell	32-cell
1	13	2019-11-27	14	4	8	009	fertilized egg	fertilized egg
1	13	2019-11-27	14	4	9	010	8-cell	8-cell
1	13	2019-11-27	14	4	10	011	32-cell	32-cell
1	13	2019-11-27	14	4	11	012	32-cell	32-cell
1	13	2019-11-27	14	4	12	0013-0015	4-cell	4-cell
1	13	2019-11-27	14	4	13	0016	2-cell	2-cell
1	13	2019-11-27	14	4	14	0017	fertilized egg	fertilized egg
1	13	2019-11-27	14	4	15	0018-0019
1	13	2019-11-27	14	4	16	0020	8-cell	8-cell
1	13	2019-11-27	17	7	1	0001-0003	16-cell	16-cell
1	13	2019-11-27	17	7	2	0004	16-cell	16-cell
1	13	2019-11-27	17	7	3	0005	16-cell	16-cell
1	13	2019-11-27	17	7	4	0006	2-cell	2-cell
1	13	2019-11-27	17	7	5	0007	8-cell	8-cell
1	13	2019-11-27	17	7	6	0008	2-cell	2-cell
1	13	2019-11-27	17	7	7	0009	8-cell	8-cell
1	13	2019-11-27	17	7	8	0010	anomalous	anomalous
1	13	2019-11-27	17	7	9	0011	8-cell	8-cell
1	13	2019-11-27	17	7	10	0012
1	13	2019-11-27	17	7	11	0013
1	13	2019-11-27	17	7	12	0014	prawn chip	blastula
1	13	2019-11-27	17	7	13	0015-0019	prawn chip	blastula
1	13	2019-11-27	17	7	14	0020	8-cell	8-cell
1	13	2019-11-27	17	7	15	0021	16-cell	16-cell
1	13	2019-11-27	17	7	16	0022	32-cell	32-cell
1	13	2019-11-27	17	7	17	0023	prawn chip	blastula
1	13	2019-11-28	10	24	1	0001	blastula	blastula
1	13	2019-11-28	10	24	2	0002	blastula	blastula
1	13	2019-11-28	10	24	3	0003	blastula	blastula
1	13	2019-11-28	10	24	4	0004-0005	blastula	blastula
1	13	2019-11-28	10	24	5	0006	gastrula	gastrula
1	13	2019-11-28	10	24	6	0007	gastrula	gastrula
1	13	2019-11-28	10	24	7	0008	blastula	blastula
1	13	2019-11-28	10	24	8	0009	blastula	blastula
1	13	2019-11-28	10	24	9	0010-0013	gastrula	gastrula
1	13	2019-11-28	10	24	10	0014	blastula	blastula
1	13	2019-11-28	10	24	11	0015	anomalous	anomalous
1	13	2019-11-28	10	24	12	0016	blastula	blastula
1	13	2019-11-28	10	24	13	0017	blastula	blastula
1	13	2019-11-28	10	24	14	0018	gastrula	gastrula
1	13	2019-11-28	10	24	15	0019	anomalous	anomalous
1	13	2019-11-28	10	24	16	0020	gastrula	gastrula
1	13	2019-11-28	10	24	17	0021	gastrula	gastrula
1	13	2019-11-28	10	24	18	0022	gastrula	gastrula
1	13	2019-11-28	18	32	1	0001	gastrula	gastrula
1	13	2019-11-28	18	32	2	0002	gastrula	gastrula
1	13	2019-11-28	18	32	3	0003	gastrula	gastrula
1	13	2019-11-28	18	32	4	0004	gastrula	gastrula
1	13	2019-11-28	18	32	5	0005	gastrula	gastrula
1	13	2019-11-28	18	32	6	0006	gastrula	gastrula
1	13	2019-11-28	18	32	7	0007	gastrula	gastrula
1	13	2019-11-28	18	32	8	0008	gastrula	gastrula
1	13	2019-11-28	18	32	9	0009	gastrula	gastrula
1	13	2019-11-28	18	32	10	0010	anomalous	anomalous
1	13	2019-11-28	18	32	11	0011	blastula	blastula
1	13	2019-11-28	18	32	12	0012	blastula	blastula
1	13	2019-11-28	18	32	13	0013	blastula	blastula
1	13	2019-11-28	18	32	14	0014	gastrula	gastrula
1	13	2019-11-28	18	32	15	0015	blastula	blastula
1	13	2019-11-28	18	32	16	0016	gastrula	gastrula
1	13	2019-11-28	18	32	17	0017	gastrula	gastrula
1	13	2019-11-29	10	48	1	0023	gastrula	gastrula
1	13	2019-11-29	10	48	2	0024	gastrula	gastrula
1	13	2019-11-29	10	48	3	0025	gastrula	gastrula
1	13	2019-11-29	10	48	4	0026	gastrula	gastrula
1	13	2019-11-29	10	48	5	0027	gastrula	gastrula
1	13	2019-11-29	10	48	6	0028	gastrula	gastrula
1	13	2019-11-29	10	48	7	0029	gastrula	gastrula
1	13	2019-11-29	10	48	8	0030	anomalous	anomalous
1	13	2019-11-29	10	48	9	0031
1	13	2019-11-29	10	48	10	0032
1	13	2019-11-29	10	48	11	0033
1	13	2019-11-29	18
1	13	2019-11-30	11	73	1	0070-0071	grapeplanula	late gastrula
1	13	2019-11-30	11	73	2	0072	grapeplanula	late gastrula
1	13	2019-11-30	11	73	3	0073-0074	grapeplanula	late gastrula
1	13	2019-11-30	11	73	4	0075
1	13	2019-11-30	11	73	5	0076-0077	grapeplanula	late gastrula
1	13	2019-11-30	11	73	6	0078	anomalous	anomalous
1	13	2019-11-30	11	73	7	0079	grapeplanula	late gastrula
1	13	2019-11-30	11	73	8	0080	grapeplanula	late gastrula
1	13	2019-12-01	9	96	1		planula	planula
1	13	2019-12-01	9	96	2		planula	planula
1	13	2019-12-01	9	96	3		planula	planula
2	13	2019-11-29	10	1	1	009	4-cell	4-cell	0.347	0.383
2	13	2019-11-29	10	1	2	0010	fertilized egg	fertilized egg	0.382	0.391
2	13	2019-11-29	10	1	3	0011	fertilized egg	fertilized egg	0.365	0.381
2	13	2019-11-29	10	1	4	0012	8-cell	8-cell	0.426	0.437
2	13	2019-11-29	10	1	5	0013	fertilized egg	fertilized egg	0.351	0.357
2	13	2019-11-29	10	1	6	0014	2-cell	2-cell	0.364	0.406
2	13	2019-11-29	10	1	7	0015	2-cell	2-cell	0.348	0.401
2	13	2019-11-29	10	1	8	0016	fertilized egg	fertilized egg	0.384	0.39
2	13	2019-11-29	10	1	9	0017-0018	8-cell	8-cell	0.386	0.424
2	13	2019-11-29	10	1	10	0019	2-cell	2-cell	0.346	0.432
2	13	2019-11-29	10	1	11	0020-0021	4-cell	4-cell	0.45	0.535
2	13	2019-11-29	10	1	12	0022	fertilized egg	fertilized egg	0.358	0.361
2	13	2019-11-29	11	2	1	0034-0039	8-cell	8-cell	0.387	0.43
2	13	2019-11-29	11	2	2	0040	fertilized egg	fertilized egg	0.364	0.348
2	13	2019-11-29	11	2	3	0041	16-cell	16-cell	0.326	0.419
2	13	2019-11-29	11	2	4	0042	8-cell	8-cell	0.412	0.409
2	13	2019-11-29	11	2	5	0043	8-cell	8-cell	0.332	0.36
2	13	2019-11-29	11	2	6	0044-0045	16-cell	16-cell	0.365	0.409
2	13	2019-11-29	11	2	7	0046	8-cell	8-cell	0.284	0.401
2	13	2019-11-29	11	2	8	0047	8-cell	8-cell	0.355	0.392
2	13	2019-11-29	11	2	9	0048	8-cell	8-cell	0.39	0.408
2	13	2019-11-29	12	3	1	0001-0002	8-cell	8-cell	0.388	0.407
2	13	2019-11-29	12	3	2	0003	8-cell	8-cell	0.356	0.403
2	13	2019-11-29	12	3	3	0004	4-cell	4-cell	0.359	0.369
2	13	2019-11-29	12	3	4	0005	8-cell	8-cell	0.335	0.371
2	13	2019-11-29	12	3	5	0006	8-cell	8-cell	0.377	0.406
2	13	2019-11-29	12	3	6	0007	8-cell	8-cell	0.346	0.401
2	13	2019-11-29	12	3	7	0008-0009	16-cell	16-cell	0.358	0.431
2	13	2019-11-29	12	3	8	0010	8-cell	8-cell	0.363	0.363
2	13	2019-11-29	12	3	9	0011	8-cell	8-cell	0.359	0.407
2	13	2019-11-29	12	3	10	0012	8-cell	8-cell	0.377	0.379
2	13	2019-11-29	12	3	11	0013	16-cell	16-cell	0.372	0.455
2	13	2019-11-29	12	3	12	0014	4-cell	4-cell	0.363	0.431
2	13	2019-11-29	12	3	13	0015	8-cell	8-cell	0.349	0.421
2	13	2019-11-29	15	6	1	0001	8-cell	8-cell	0.379	0.381
2	13	2019-11-29	15	6	2	0002	8-cell	8-cell	0.355	0.377
2	13	2019-11-29	15	6	3	0003	8-cell	8-cell	0.38	0.409
2	13	2019-11-29	15	6	4	0004	8-cell	8-cell	0.359	0.393
2	13	2019-11-29	15	6	5	0005-0010	16-cell	16-cell	0.358	0.396
2	13	2019-11-29	15	6	6	0011-0014	32-cell	32-cell	0.364	0.426
2	13	2019-11-29	15	6	7	0015-0021	16-cell	16-cell	0.382	0.364
2	13	2019-11-29	15	6	8	0022	16-cell	16-cell	0.365	0.432
2	13	2019-11-29	15	6	9	0023	8-cell	8-cell	0.369	0.411
2	13	2019-11-29	15	6	10	0024	16-cell	16-cell	0.382	0.404
2	13	2019-11-29	15	6	11	0025	32-cell	32-cell	0.385	0.443
2	13	2019-11-29	15	6	12	0026	32-cell	32-cell	0.384	0.405
2	13	2019-11-29	18	9	1	0021-0023	64-cell	64-cell	0.368	0.377
2	13	2019-11-29	18	9	2	0023	8-cell	8-cell	0.323	0.385
2	13	2019-11-29	18	9	3	0024	8-cell	8-cell	0.34	0.381
2	13	2019-11-29	18	9	4	0025-0026	64-cell	64-cell	0.408	0.417
2	13	2019-11-29	18	9	5	0027	8-cell	8-cell	0.363	0.404
2	13	2019-11-29	18	9	6	0028	64-cell	64-cell	0.405	0.436
2	13	2019-11-29	18	9	7	0029	blastula	blastula	0.416	0.419
2	13	2019-11-29	18	9	8	0030-0031	prawn chip	blastula	0.382	0.467
2	13	2019-11-29	18	9	9	0032-0037	prawn chip	blastula	0.365	0.365
2	13	2019-11-29	18	9	10	0038	prawn chip	blastula	0.381	0.418
2	13	2019-11-30	9	24	1	0031	gastrula	gastrula	0.445	0.496
2	13	2019-11-30	9	24	2	0032-0035	gastrula	gastrula	0.44	0.475
2	13	2019-11-30	9	24	3	0037	gastrula	gastrula	0.43	0.444
2	13	2019-11-30	9	24	4	0038	gastrula	gastrula	0.461	0.467
2	13	2019-11-30	9	24	5	0039-0043	gastrula	gastrula	0.435	0.466
2	13	2019-11-30	9	24	6	0045	gastrula	gastrula	0.353	0.495
2	13	2019-11-30	9	24	7	0046	gastrula	gastrula	0.385	0.463
2	13	2019-12-01	9	48	1	0001-005	gastrula	gastrula	0.41	0.44
2	13	2019-12-01	9	48	2	0006-0007	gastrula	gastrula	0.34	0.41
2	13	2019-12-01	9	48	3	0008	gastrula	gastrula	0.41	0.44
2	13	2019-12-01	9	48	4	0009	gastrula	gastrula	0.42	0.43
2	13	2019-12-01	9	48	5	0010	gastrula	gastrula	0.36	0.37
2	13	2019-12-01	9	48	6	0011	gastrula	gastrula	0.35	0.53
2	13	2019-12-01	9	48	7	0012	gastrula	gastrula	0.43	0.44
2	13	2019-12-01	9	48	8	0013	gastrula	gastrula	0.33	0.4
2	13	2019-12-01	9	48	9	0014	gastrula	gastrula	0.3	0.44
2	13	2019-12-01	9	48	10	0015	gastrula	gastrula	0.36	0.51
2	13	2019-12-02	9	72	1	0037	grapeplanula	late gastrula	0.31	0.53
2	13	2019-12-02	9	72	2	0038-0042	grapeplanula	late gastrula	0.31	0.52
2	13	2019-12-02	9	72	3	0043	grapeplanula	late gastrula	0.33	0.54
2	13	2019-12-02	9	72	4	0044	grapeplanula	late gastrula	0.35	0.38
2	13	2019-12-02	9	72	5	0045	grapeplanula	late gastrula	0.329	0.47
2	13	2019-12-02	9	72	6	0046	grapeplanula	late gastrula	0.299	0.475
2	13	2019-12-02	9	72	7	0047	grapeplanula	late gastrula	0.36	0.494
2	13	2019-12-02	9	72	8	0048	grapeplanula	late gastrula	0.314	0.497
2	13	2019-12-02	9	72	9	0049	grapeplanula	late gastrula	0.347	0.514
2	13	2019-12-03	9	96	1		planula	planula
2	13	2019-12-03	9	96	2		planula	planula
2	13	2019-12-03	9	96	3		planula	planula
2-15	15	2019-11-29	11	1	1	0049	4-cell	4-cell	0.395	0.395
2-15	15	2019-11-29	11	1	2	0050	4-cell	4-cell	0.383	0.416
2-15	15	2019-11-29	11	1	3	0051	fertilized egg	fertilized egg	0.361	0.379
2-15	15	2019-11-29	11	1	4	0052	16-cell	16-cell	0.355	0.457
2-15	15	2019-11-29	11	1	5	0053	16-cell	16-cell	0.356	0.446
2-15	15	2019-11-29	11	1	6	0054	fertilized egg	fertilized egg	0.36	0.366
2-15	15	2019-11-29	11	1	7	0055	8-cell	8-cell	0.382	0.39
2-15	15	2019-11-29	11	1	8	0056	4-cell	4-cell	0.36	0.408
2-15	15	2019-11-29	11	1	9	0057	8-cell	8-cell	0.335	0.431
2-15	15	2019-11-29	12	2	1	0016	8-cell	8-cell	0.373	0.42
2-15	15	2019-11-29	12	2	2	0017	16-cell	16-cell	0.426	0.433
2-15	15	2019-11-29	12	2	3	0018	8-cell	8-cell	0.369	0.38
2-15	15	2019-11-29	12	2	4	0019	8-cell	8-cell	0.403	0.43
2-15	15	2019-11-29	12	2	5	0020	fertilized egg	fertilized egg	0.351	0.355
2-15	15	2019-11-29	12	2	6	0021	16-cell	16-cell	0.347	0.414
2-15	15	2019-11-29	12	2	7	0022	16-cell	16-cell	0.391	0.421
2-15	15	2019-11-29	12	2	8	0023	4-cell	4-cell	0.364	0.381
2-15	15	2019-11-29	12	2	9	0024-30	8-cell	8-cell	0.396	0.411
2-15	15	2019-11-29	12	2	10	0031	4-cell	4-cell	0.361	0.389
2-15	15	2019-11-29	15	5	1	0027	8-cell	8-cell	0.382	0.403
2-15	15	2019-11-29	15	5	2	0028	8-cell	8-cell	0.367	0.399
2-15	15	2019-11-29	15	5	3	0029-0033	blastula	blastula	0.37	0.41
2-15	15	2019-11-29	15	5	4	0034-0035	32-cell	32-cell	0.368	0.379
2-15	15	2019-11-29	15	5	5	0036	8-cell	8-cell	0.351	0.36
2-15	15	2019-11-29	15	5	6	0037	32-cell	32-cell	0.365	0.377
2-15	15	2019-11-29	15	5	7	0038	16-cell	16-cell	0.369	0.4
2-15	15	2019-11-29	15	5	8	0039	32-cell	32-cell	0.386	0.394
2-15	15	2019-11-29	15	5	9	0040	16-cell	16-cell	0.332	0.386
2-15	15	2019-11-29	18	8	1	005			0.407	0.409
2-15	15	2019-11-29	18	8	2	006	prawn chip	blastula	0.383	0.395
2-15	15	2019-11-29	18	8	3	007-008	prawn chip	blastula	0.382	0.413
2-15	15	2019-11-29	18	8	4	0009	prawn chip	blastula	0.392	0.414
2-15	15	2019-11-29	18	8	5	0010	64-cell	64-cell	0.389	0.419
2-15	15	2019-11-29	18	8	6	0011-0015	32-cell	32-cell	0.381	0.408
2-15	15	2019-11-29	18	8	7	0016	64-cell	64-cell	0.373	0.379
2-15	15	2019-11-29	18	8	8	0017	prawn chip	blastula	0.406	0.415
2-15	15	2019-11-29	18	8	9	0018-0019	blastula	blastula	0.401	0.448
2-15	15	2019-11-29	18	8	10	0020			0.356	0.392
2-15	15	2019-11-29	20	10	1	0010	blastula	blastula	0.38	0.383
2-15	15	2019-11-29	20	10	2	0011-0013			0.445	0.292
2-15	15	2019-11-29	20	10	3	0014-0019	blastula	blastula	0.394	0.405
2-15	15	2019-11-29	20	10	4	0020	blastula	blastula	0.326	0.383
2-15	15	2019-11-29	20	10	5	0021	blastula	blastula	0.371	0.409
2-15	15	2019-11-29	20	10	6	0022	blastula	blastula	0.375	0.385
2-15	15	2019-11-29	20	10	7	0023	blastula	blastula	0.402	0.424
2-15	15	2019-11-29	20	10	8	0024	blastula	blastula	0.368	0.416
2-15	15	2019-11-30	9	24	1	0048	gastrula	gastrula	0.365	0.429
2-15	15	2019-11-30	9	24	2	0049	gastrula	gastrula	0.362	0.459
2-15	15	2019-11-30	9	24	3	0050	gastrula	gastrula	0.417	0.443
2-15	15	2019-11-30	9	24	4	0051	gastrula	gastrula	0.429	0.499
2-15	15	2019-11-30	9	24	5	0052-0055	gastrula	gastrula	0.417	0.503
2-15	15	2019-11-30	9	24	6	0056	gastrula	gastrula	0.402	0.419
2-15	15	2019-11-30	9	24	7	0057	gastrula	gastrula	0.381	0.431
2-15	15	2019-11-30	9	24	8	0058-0060	gastrula	gastrula	0.414	0.427
2-15	15	2019-11-30	9	24	9	0061	gastrula	gastrula	0.394	0.424
2-15	15	2019-11-30	9	24	10	0062	gastrula	gastrula	0.399	0.411
2-15	15	2019-11-30	9	24	11	0063	gastrula	gastrula	0.389	0.456
2-15	15	2019-12-01	9	48	1	0026	planula	planula	0.291	0.522
2-15	15	2019-12-01	9	48	2	0027	grapeplanula	late gastrula	0.385	0.503
2-15	15	2019-12-01	9	48	3	0028	gastrula	gastrula	0.412	0.449
2-15	15	2019-12-01	9	48	4	0029	grapeplanula	late gastrula	0.427	0.332
2-15	15	2019-12-01	9	48	5	0030	gastrula	gastrula	0.424	0.441
2-15	15	2019-12-01	9	48	6	0031	grapeplanula	late gastrula	0.437	0.454
2-15	15	2019-12-01	9	48	7	0032	grapeplanula	late gastrula	0.354	0.393
2-15	15	2019-12-01	9	48	8	0033	grapeplanula	late gastrula	0.369	0.42
2-15	15	2019-12-01	9	48	9	0034	grapeplanula	late gastrula	0.331	0.436
2-15	15	2019-12-01	9	48	10	0035	grapeplanula	late gastrula	0.376	0.423
2-15	15	2019-12-02	9	72	1		planula	planula	0.323	0.527
2-15	15	2019-12-02	9	72	2		planula	planula	0.325	0.463
2-15	15	2019-12-02	9	72	3		planula	planula	0.334	0.477
3-15	15	2019-11-29	17	1	1	0001	fertilized egg	fertilized egg	0.319	0.324
3-15	15	2019-11-29	17	1	2	0002	fertilized egg	fertilized egg	0.381	0.387
3-15	15	2019-11-29	17	1	3	0003	4-cell	4-cell	0.398	0.403
3-15	15	2019-11-29	17	1	4	0004	4-cell	4-cell	0.356	0.362
3-15	15	2019-11-29	20	2	1	0001	16-cell	16-cell	0.429	0.448
3-15	15	2019-11-29	20	2	2	0002	fertilized egg	fertilized egg	0.357	0.376
3-15	15	2019-11-29	20	2	3	0003-0004	16-cell	16-cell	0.392	0.373
3-15	15	2019-11-29	20	2	4	0005	fertilized egg	fertilized egg	0.325	0.325
3-15	15	2019-11-29	20	2	5	006-007	16-cell	16-cell	0.376	0.38
3-15	15	2019-11-29	20	2	6	008-009	16-cell	16-cell	0.338	0.599
3-15	15	2019-11-30	10	16	1	0064	gastrula	gastrula	0.372	0.476
3-15	15	2019-11-30	10	16	2	0065	blastula	blastula	0.354	0.468
3-15	15	2019-11-30	10	16	3	0066	gastrula	gastrula	0.398	0.409
3-15	15	2019-11-30	10	16	4	0067	gastrula	gastrula	0.397	0.446
3-15	15	2019-11-30	10	16	5	0068	gastrula	gastrula	0.41	0.431
3-15	15	2019-11-30	10	16	6	0069	blastula	blastula	0.311	0.343
3-15	15	2019-12-01	9	40	1	0055-0056	grapeplanula	late gastrula	0.384	0.485
3-15	15	2019-12-01	9	40	2	0057	gastrula	gastrula	0.424	0.545
3-15	15	2019-12-01	9	40	3	0058	gastrula	gastrula	0.402	0.531
3-15	15	2019-12-01	9	40	4	0059	gastrula	gastrula	0.324	0.389
3-15	15	2019-12-01	9	40	5	0060	gastrula	gastrula	0.47	0.52
3-15	15	2019-12-01	9	40	6	0061	gastrula	gastrula	0.455	0.559
3-15	15	2019-12-02	9	64	1	0011	grapeplanula	late gastrula	0.308	0.393
3-15	15	2019-12-02	9	64	2	0012	grapeplanula	late gastrula	0.351	0.526
3-15	15	2019-12-02	9	64	3	0013	planula	planula	0.337	0.483
3-15	15	2019-12-02	9	64	4	0014	planula	planula	0.319	0.483
3-15	15	2019-12-02	9	64	5	0015	grapeplanula	late gastrula	0.347	0.483
3-15	15	2019-12-02	9	64	6	0016-0017	planula	planula	0.31	0.379
3-15	15	2019-12-02	9	64	7	0018	planula	planula	0.364	0.463
4	13	2019-11-30	9	4	1	0010	16-cell	16-cell	0.311	0.531
4	13	2019-11-30	9	4	2	0011	16-cell	16-cell	0.329	0.408
4	13	2019-11-30	9	4	3	0012	8-cell	8-cell	0.378	0.428
4	13	2019-11-30	9	4	4	0013	8-cell	8-cell
4	13	2019-11-30	9	4	5	0014	8-cell	8-cell	0.393	0.395
4	13	2019-11-30	9	4	6	0015	8-cell	8-cell	0.408	0.412
4	13	2019-11-30	9	4	7	0022	8-cell	8-cell	0.389	0.401
4	13	2019-11-30	9	4	8	0023	8-cell	8-cell	0.409	0.405
4	13	2019-11-30	9	4	9	0024	8-cell	8-cell	0.381	0.455
4	13	2019-11-30	17	10	1	0013	blastula	blastula	0.377	0.41
4	13	2019-11-30	17	10	2	0014	blastula	blastula	0.388	0.41
4	13	2019-11-30	17	10	3	0015	blastula	blastula	0.392	0.395
4	13	2019-11-30	17	10	4	0016	blastula	blastula	0.314	0.411
4	13	2019-11-30	17	10	5	0017	blastula	blastula	0.373	0.392
4	13	2019-11-30	17	10	6	0018	blastula	blastula	0.359	0.369
4	13	2019-11-30	17	10	7	0019	blastula	blastula	0.376	0.397
4	13	2019-11-30	17	10	8	0020	blastula	blastula	0.351	0.371
4	13	2019-11-30	17	10	9	0021	blastula	blastula	0.385	0.404
4	13	2019-11-30	17	10	10	0022	blastula	blastula	0.395	0.414
4	13	2019-11-30	17	10	11	0023	blastula	blastula	0.383	0.395
4	13	2019-12-01	9	28	1	0016	gastrula	gastrula	0.39	0.53
4	13	2019-12-01	9	28	2	0017	gastrula	gastrula	0.41	0.497
4	13	2019-12-01	9	28	3	0018	gastrula	gastrula	0.347	0.508
4	13	2019-12-01	9	28	4	0019	gastrula	gastrula	0.441	0.505
4	13	2019-12-01	9	28	5	0020	gastrula	gastrula	0.418	0.432
4	13	2019-12-01	9	28	6	0021	gastrula	gastrula	0.426	0.451
4	13	2019-12-01	9	28	7	0022	gastrula	gastrula	0.41	0.465
4	13	2019-12-01	9	28	8	0023	gastrula	gastrula	0.396	0.466
4	13	2019-12-01	9	28	9	0024	gastrula	gastrula	0.43	0.522
4	13	2019-12-01	9	28	10	0025	gastrula	gastrula	0.409	0.415
4	13	2019-12-02	9	52	1	0027	gastrula	gastrula	0.344	0.427
4	13	2019-12-02	9	52	2	0028	gastrula	gastrula	0.395	0.498
4	13	2019-12-02	9	52	3	0029	gastrula	gastrula	0.38	0.545
4	13	2019-12-02	9	52	4	0030	gastrula	gastrula	0.437	0.453
4	13	2019-12-02	9	52	5	0031	gastrula	gastrula	0.464	0.425
4	13	2019-12-02	9	52	6	0032	gastrula	gastrula	0.443	0.501
4	13	2019-12-02	9	52	7	0033	gastrula	gastrula	0.501	0.521
4	13	2019-12-02	9	52	8	0034	gastrula	gastrula	0.361	0.473
4	13	2019-12-02	9	52	9	0035	gastrula	gastrula	0.425	0.433
4	13	2019-12-02	9	52	10	0036	gastrula	gastrula	0.421	0.376
4	13	2019-12-03	9	76	1	0001	grapeplanula	late gastrula	0.338	0.511
4	13	2019-12-03	9	76	2	0002	grapeplanula	late gastrula	0.351	0.48
4	13	2019-12-03	9	76	3	0003	grapeplanula	late gastrula	0.388	0.483
4	13	2019-12-03	9	76	4	0004	grapeplanula	late gastrula	0.359	0.474
4	13	2019-12-03	9	76	5	0005	grapeplanula	late gastrula	0.327	0.536
4	13	2019-12-03	9	76	6	0006	grapeplanula	late gastrula	0.341	0.499
4	13	2019-12-03	9	76	7	0007	grapeplanula	late gastrula	0.325	0.528
4	13	2019-12-03	9	76	8	0008	grapeplanula	late gastrula	0.354	0.49
4	13	2019-12-03	9	76	9	0009	grapeplanula	late gastrula	0.298	0.521
4	13	2019-12-04	9	100	1		planula	planula
4	13	2019-12-04	9	100	2		planula	planula
4	13	2019-12-04	9	100	3		planula	planula
4-15	15	2019-11-30	9	1	1	0001	8-cell	8-cell	0.356	0.41
4-15	15	2019-11-30	9	1	2	0002-0003	fertilized egg	fertilized egg	0.348	0.415
4-15	15	2019-11-30	9	1	3	0004	8-cell	8-cell	0.427	0.453
4-15	15	2019-11-30	9	1	4	0005	fertilized egg	fertilized egg	0.361	0.368
4-15	15	2019-11-30	9	1	5	0006	8-cell	8-cell	0.39	0.394
4-15	15	2019-11-30	9	1	6	0007	4-cell	4-cell	0.39	0.429
4-15	15	2019-11-30	9	1	7	0008	8-cell	8-cell	0.38	0.39
4-15	15	2019-11-30	9	1	8	0009	4-cell	4-cell	0.375	0.39
4-15	15	2019-11-30	9	1	9	0013	8-cell	8-cell	0.359	0.41
4-15	15	2019-11-30	9	1	10	0016	8-cell	8-cell	0.385	0.397
4-15	15	2019-11-30	9	1	11	0017-0019	8-cell	8-cell	0.388	0.423
4-15	15	2019-11-30	9	1	12	0021-0024	8-cell	8-cell	0.371	0.392
4-15	15	2019-11-30	9	1	13	0025	fertilized egg	fertilized egg	0.329	0.33
4-15	15	2019-11-30	9	1	14	0027	4-cell	4-cell	0.253	0.344
4-15	15	2019-11-30	9	1	15	0028	8-cell	8-cell	0.259	0.384
4-15	15	2019-11-30	9	1	16	0029	2-cell	2-cell	0.322	0.394
4-15	15	2019-11-30	9	1	17	0030	fertilized egg	fertilized egg	0.351	0.355
4-15	15	2019-11-30	11	3	1	0081	fertilized egg	fertilized egg	0.358	0.37
4-15	15	2019-11-30	11	3	2	0082-0083	32-cell	32-cell	0.399	0.439
4-15	15	2019-11-30	11	3	3	0084	2-cell	2-cell	0.349	0.352
4-15	15	2019-11-30	11	3	4	0085	16-cell	16-cell	0.387	0.433
4-15	15	2019-11-30	11	3	5	0086	16-cell	16-cell	0.36	0.406
4-15	15	2019-11-30	11	3	6	0087	8-cell	8-cell	0.324	0.391
4-15	15	2019-11-30	11	3	7	0088	8-cell	8-cell	0.349	0.384
4-15	15	2019-11-30	11	3	8	0089	16-cell	16-cell	0.383	0.398
4-15	15	2019-11-30	11	3	9	0090	8-cell	8-cell	0.377	0.445
4-15	15	2019-11-30	11	3	10	0091	16-cell	16-cell	0.377	0.412
4-15	15	2019-11-30	16	8	1	0001	prawn chip	blastula	0.405	0.416
4-15	15	2019-11-30	16	8	2	0002	prawn chip	blastula	0.342	0.401
4-15	15	2019-11-30	16	8	3	0003	prawn chip	blastula	0.384	0.387
4-15	15	2019-11-30	16	8	4	0004	prawn chip	blastula	0.397	0.413
4-15	15	2019-11-30	16	8	5	0005	prawn chip	blastula	0.341	0.373
4-15	15	2019-11-30	16	8	6	0007	prawn chip	blastula	0.386	0.423
4-15	15	2019-11-30	16	8	7	0006	16-cell	16-cell	0.415	0.426
4-15	15	2019-11-30	16	8	8	0008	prawn chip	blastula	0.355	0.379
4-15	15	2019-11-30	16	8	9	0009	prawn chip	blastula	0.403	0.43
4-15	15	2019-11-30	16	8	10	0010	prawn chip	blastula	0.36	0.384
4-15	15	2019-11-30	16	8	11	0011	prawn chip	blastula	0.389	0.397
4-15	15	2019-11-30	16	8	12	0012	prawn chip	blastula	0.369	0.382
4-15	15	2019-12-01	9	24	1	0036-0046	gastrula	gastrula	0.457	0.517
4-15	15	2019-12-01	9	24	2	0047	gastrula	gastrula	0.47	0.523
4-15	15	2019-12-01	9	24	3	0048	gastrula	gastrula	0.51	0.555
4-15	15	2019-12-01	9	24	4	0049	gastrula	gastrula	0.439	0.441
4-15	15	2019-12-01	9	24	5	0050	gastrula	gastrula	0.384	0.485
4-15	15	2019-12-01	9	24	6	0051	gastrula	gastrula	0.433	0.464
4-15	15	2019-12-01	9	24	7	0052	unfertilized egg	unfertilized egg	0.377	0.381
4-15	15	2019-12-01	9	24	8	0053	gastrula	gastrula	0.442	0.532
4-15	15	2019-12-01	9	24	9	0054	gastrula	gastrula	0.4	0.411
4-15	15	2019-12-02	9	48	1	0001	gastrula	gastrula	0.408	0.485
4-15	15	2019-12-02	9	48	2	0002	grapeplanula	late gastrula	0.31	0.447
4-15	15	2019-12-02	9	48	3	0003	grapeplanula	late gastrula	0.381	0.485
4-15	15	2019-12-02	9	48	4	0004	grapeplanula	late gastrula	0.3	0.457
4-15	15	2019-12-02	9	48	5	0005	grapeplanula	late gastrula	0.318	0.512
4-15	15	2019-12-02	9	48	6	0006	grapeplanula	late gastrula	0.355	0.43
4-15	15	2019-12-02	9	48	7	0007	grapeplanula	late gastrula	0.359	0.51
4-15	15	2019-12-02	9	48	8	0008	gastrula	gastrula	0.403	0.489
4-15	15	2019-12-02	9	48	9	0009	grapeplanula	late gastrula	0.34	0.47
4-15	15	2019-12-02	9	48	10	0010	grapeplanula	late gastrula	0.355	0.468
4-15	15	2019-12-03	9	72	1		planula	planula
4-15	15	2019-12-03	9	72	2		planula	planula
4-15	15	2019-12-03	9	72	3		planula	planula
2-15	15	2019-12-03	9	96	1		planula	planula
2-15	15	2019-12-03	9	96	2		planula	planula
2-15	15	2019-12-03	9	96	3		planula	planula
4-15	15	2019-12-04	9	96	1		planula	planula
4-15	15	2019-12-04	9	96	2		planula	planula
4-15	15	2019-12-04	9	96	3		planula	planula
B4-15	15	2020-12-04	4	96			planula	planula	0.291	0.792
B4-15	15	2020-12-04	4	96			planula	planula	0.55	0.998
B4-15	15	2020-12-04	4	96			planula	planula	0.495	0.931
B4-15	15	2020-12-04	4	96			planula	planula	0.47	0.89
B4	13	2020-12-04	4	96			planula	planula	0.539	0.959
B4	13	2020-12-04	4	96			planula	planula	0.69	0.792
B4	13	2020-12-04	4	96			planula	planula	0.798	0.931
B4	13	2020-12-04	4	96			planula	planula	0.854	0.897
B2-15	15	2020-12-03	4	96			planula	planula	0.556	0.964
B2-15	15	2020-12-03	4	96			planula	planula	0.714	1.107
B2-15	15	2020-12-03	4	96			planula	planula	0.837	0.855
B2-15	15	2020-12-03	4	96			planula	planula	0.727	0.857
B2	13	2020-12-03	4	96			planula	planula	0.575	0.959
B2	13	2020-12-03	4	96			planula	planula	0.726	0.692
B2	13	2020-12-03	4	96			planula	planula	0.984	1.014
B2	13	2020-12-03	4	96			planula	planula	0.717	0.863
B2	13	2020-12-03	4	96			planula	planula	0.792	0.782
B4	13	2020-12-14	14	336			planula	planula	0.54	1.33
B4	13	2020-12-14	14	336			planula	planula	0.696	1.052
B4	13	2020-12-14	14	336			planula	planula	0.446	1.333
B4	13	2020-12-14	14	336			planula	planula	0.524	1.08
B4-15	15	2020-12-14	14	336			planula	planula	0.54	1.254
B4-15	15	2020-12-14	14	336			planula	planula	0.584	1.108
B4-15	15	2020-12-14	14	336			planula	planula	0.398	0.905
B4-15	15	2020-12-14	14	336			planula	planula	0.526	1.317
B2	13	2020-12-14	14	336			planula	planula	0.613	1.421
B2	13	2020-12-14	14	336			planula	planula	0.63	1.511
B2	13	2020-12-14	14	336			planula	planula	0.954	1.612
B2	13	2020-12-14	14	336			planula	planula	0.973	1.434
B6-15	15	2020-12-14	14	336			planula	planula	0.617	1.406
B6-15	15	2020-12-14	14	336			planula	planula	0.715	1.605
B6-15	15	2020-12-14	14	336			planula	planula	0.74	1.33
B6-15	15	2020-12-14	14	336			planula	planula	0.741	1.702
B6-15	15	2020-12-14	14	336			planula	planula	0.715	1.456
B6	13	2020-12-14	14	336			planula	planula	0.763	1.449
B6	13	2020-12-14	14	336			planula	planula	0.794	1.322
B6	13	2020-12-14	14	336			planula	planula	0.779	1.339
B6	13	2020-12-14	14	336			planula	planula	0.701	1.486

## Sheet: SurvivalCounts
Temperature	Batch	Larvae	LastDayAlive	Trunc
13	1	1	7	1
13	1	2	7	1
13	1	3	7	1
13	1	4	7	1
13	1	5	7	1
13	1	6	7	1
13	1	7	5	0
13	1	8	5	0
13	1	9	4	0
13	1	10	3	0
13	1	11	3	0
13	1	12	3	0
13	1	13	3	0
13	1	14	3	0
13	1	15	3	0
13	2	1	1	0
13	2	2	1	0
13	2	3	1	0
13	2	4	1	0
13	2	5	1	0
13	2	6	1	0
13	2	7	1	0
13	2	8	1	0
13	2	9	1	0
13	2	10	1	0
13	2	11	1	0
13	2	12	1	0
13	2	13	1	0
13	2	14	1	0
13	2	15	1	0
13	2	16	2	0
13	2	17	2	0
13	2	18	3	0
13	2	19	3	0
13	2	20	3	0
13	2	21	3	0
13	2	22	3	0
13	2	23	3	0
13	2	24	3	0
13	2	25	3	0
13	2	26	3	0
13	2	27	3	0
13	2	28	3	0
13	2	29	3	0
13	2	30	3	0
13	2	31	14	0
13	2	32	14	0
13	2	33	14	0
13	2	34	14	0
13	2	35	14	0
13	2	36	14	0
13	2	37	14	0
13	2	38	14	0
13	2	39	14	0
13	2	40	14	0
13	2	41	14	0
13	2	42	14	0
13	2	43	14	0
13	2	44	14	0
13	2	45	14	0
13	2	46	14	0
13	2	47	14	0
13	2	48	14	0
13	2	49	14	0
13	2	50	14	0
13	2	51	14	0
13	2	52	19	0
13	2	53	19	0
13	2	54	19	0
13	2	55	19	0
13	2	56	19	0
13	2	57	19	0
13	2	58	19	0
13	2	59	20	1
13	2	60	20	1
13	2	61	20	1
13	2	62	20	1
13	2	63	20	1
13	2	64	20	1
13	2	65	20	1
13	2	66	20	1
13	2	67	20	1
13	2	68	20	1
13	2	69	20	1
13	2	70	20	1
15	2-15	1	1	0
15	2-15	2	1	0
15	2-15	3	3	0
15	2-15	4	3	0
15	2-15	5	3	0
15	2-15	6	4	0
15	2-15	7	4	0
15	2-15	8	7	0
15	2-15	9	7	0
15	2-15	10	7	0
15	2-15	11	7	0
15	2-15	12	7	0
15	2-15	13	7	0
15	2-15	14	7	0
15	2-15	15	7	0
15	2-15	16	7	0
15	2-15	17	7	0
15	2-15	18	7	0
15	2-15	19	19	0
15	2-15	20	19	0
15	2-15	21	19	0
15	2-15	22	19	0
15	2-15	23	20	1
15	2-15	24	20	1
15	3-15	1	1	0
15	3-15	2	1	0
15	3-15	3	4	0
15	3-15	4	4	0
15	3-15	5	5	1
15	3-15	6	5	1
15	3-15	7	5	1
15	3-15	8	5	1
15	3-15	9	5	1
15	3-15	10	5	1
13	4	1	2	0
13	4	2	2	0
13	4	3	2	0
13	4	4	2	0
13	4	5	2	0
13	4	6	2	0
13	4	7	4	0
13	4	8	4	0
13	4	9	4	0
13	4	10	4	0
13	4	11	6	0
13	4	12	14	0
13	4	13	14	0
13	4	14	24	0
13	4	15	24	0
13	4	16	24	0
13	4	17	24	0
13	4	18	24	0
13	4	19	24	0
13	4	20	28	0
13	4	21	28	0
13	4	22	28	0
13	4	23	28	0
13	4	24	28	0
13	4	25	32	0
13	4	26	32	0
13	4	27	32	0
13	4	28	32	0
13	4	29	32	0
13	4	30	32	0
13	4	31	32	0
13	4	32	39	1
13	4	33	39	1
13	4	34	39	1
13	4	35	39	1
13	4	36	39	1
13	4	37	39	1
13	4	38	39	1
13	4	39	39	1
13	4	40	39	1
13	4	41	39	1
13	4	42	39	1
13	4	43	39	1
13	4	44	39	1
13	4	45	39	1
13	4	46	39	1
13	4	47	39	1
15	4-15	47	1	0
15	4-15	46	1	0
15	4-15	45	1	0
15	4-15	44	4	0
15	4-15	43	4	0
15	4-15	42	4	0
15	4-15	41	4	0
15	4-15	40	4	0
15	4-15	39	4	0
15	4-15	38	4	0
15	4-15	37	4	0
15	4-15	36	4	0
15	4-15	35	4	0
15	4-15	34	4	0
15	4-15	33	4	0
15	4-15	32	4	0
15	4-15	31	4	0
15	4-15	30	6	0
15	4-15	29	6	0
15	4-15	28	6	0
15	4-15	27	6	0
15	4-15	26	6	0
15	4-15	25	6	0
15	4-15	24	14	0
15	4-15	23	14	0
15	4-15	22	14	0
15	4-15	21	14	0
15	4-15	20	14	0
15	4-15	19	14	0
15	4-15	18	14	0
15	4-15	17	19	0
15	4-15	16	19	0
15	4-15	15	19	0
15	4-15	14	19	0
15	4-15	13	19	0
15	4-15	12	19	0
15	4-15	11	19	0
15	4-15	10	24	0
15	4-15	9	24	0
15	4-15	8	28	0
15	4-15	7	28	0
15	4-15	6	35	0
15	4-15	5	35	0
15	4-15	4	35	0
15	4-15	3	39	1
15	4-15	2	39	1
15	4-15	1	39	1
13	5	1	34	1
13	5	2	34	1
13	5	3	34	1
13	5	4	34	1
13	5	5	34	1
13	5	6	34	1
13	5	7	34	1
13	5	8	34	1
13	5	9	34	1
13	5	10	34	1
13	5	11	34	1
13	5	12	34	1
13	5	13	34	1
13	5	14	34	1
13	5	15	34	1
13	5	16	30	0
13	5	17	27	0
13	5	18	27	0
13	5	19	19	0
13	5	20	19	0
13	5	21	19	0
13	5	22	19	0
13	5	23	19	0
13	5	24	19	0
13	5	25	19	0
13	5	26	19	0
13	5	27	19	0
13	5	28	19	0
13	5	29	19	0
13	5	30	19	0
13	5	31	14	0
13	5	32	14	0
13	5	33	14	0
13	5	34	14	0
13	5	35	14	0
13	5	36	14	0
13	5	37	14	0
13	5	38	14	0
13	5	39	14	0
13	5	40	14	0
13	5	41	14	0
13	5	42	14	0
13	5	43	14	0
13	5	44	14	0
13	5	45	14	0
13	5	46	14	0
13	5	47	14	0
13	5	48	14	0
13	5	49	9	0
13	5	50	9	0
13	5	51	9	0
13	5	52	9	0
13	5	53	9	0
13	5	54	9	0
13	5	55	9	0
13	5	56	9	0
13	5	57	9	0
13	5	58	9	0
13	5	59	9	0
13	5	60	9	0
13	5	61	9	0
13	5	62	9	0
13	5	63	9	0
13	5	64	9	0
13	5	65	1	0
13	5	66	1	0
13	5	67	1	0
13	5	68	1	0
13	5	69	1	0
13	5	70	1	0
13	5	71	1	0
13	5	72	1	0
13	5	73	1	0
13	5	74	1	0
13	5	75	1	0
13	5	76	1	0
13	5	77	1	0
13	5	78	1	0
13	5	79	1	0
13	5	80	1	0
13	5	81	1	0
13	5	82	1	0
13	5	83	1	0
13	5	84	1	0
13	5	85	1	0
13	5	86	1	0
13	5	87	1	0
13	5	88	1	0
13	5	89	1	0
13	5	90	1	0
13	5	91	1	0
13	5	92	1	0
13	5	93	1	0
13	5	94	1	0
13	5	95	1	0
13	5	96	1	0
13	5	97	1	0
13	5	98	1	0
13	5	99	1	0
13	5	100	1	0
13	5	101	1	0
13	5	102	1	0
13	5	103	1	0
13	5	104	1	0
13	5	105	1	0
13	5	106	1	0
13	5	107	1	0
13	5	108	1	0
13	5	109	1	0
13	5	110	1	0
15	5-15	1	34	1
15	5-15	2	34	1
15	5-15	3	34	1
15	5-15	4	34	1
15	5-15	5	34	1
15	5-15	6	34	1
15	5-15	7	34	1
15	5-15	8	34	1
15	5-15	9	34	1
15	5-15	10	34	1
15	5-15	11	34	1
15	5-15	12	34	1
15	5-15	13	34	1
15	5-15	14	34	1
15	5-15	15	34	1
15	5-15	16	34	1
15	5-15	17	34	1
15	5-15	18	34	1
15	5-15	19	34	1
15	5-15	20	34	1
15	5-15	21	34	1
15	5-15	22	34	1
15	5-15	23	34	1
15	5-15	24	34	1
15	5-15	25	34	1
15	5-15	26	34	1
15	5-15	27	34	1
15	5-15	28	34	1
15	5-15	29	34	1
15	5-15	30	34	1
15	5-15	31	30	0
15	5-15	32	30	0
15	5-15	33	30	0
15	5-15	34	30	0
15	5-15	35	30	0
15	5-15	36	30	0
15	5-15	37	30	0
15	5-15	38	30	0
15	5-15	39	30	0
15	5-15	40	30	0
15	5-15	41	30	0
15	5-15	42	30	0
15	5-15	43	30	0
15	5-15	44	30	0
15	5-15	45	30	0
15	5-15	46	30	0
15	5-15	47	30	0
15	5-15	48	30	0
15	5-15	49	27	0
15	5-15	50	27	0
15	5-15	51	27	0
15	5-15	52	27	0
15	5-15	53	27	0
15	5-15	54	27	0
15	5-15	55	27	0
15	5-15	56	27	0
15	5-15	57	27	0
15	5-15	58	27	0
15	5-15	59	27	0
15	5-15	60	27	0
15	5-15	61	27	0
15	5-15	62	27	0
15	5-15	63	27	0
15	5-15	64	27	0
15	5-15	65	27	0
15	5-15	66	27	0
15	5-15	67	27	0
15	5-15	68	23	0
15	5-15	69	23	0
15	5-15	70	23	0
15	5-15	71	23	0
15	5-15	72	23	0
15	5-15	73	23	0
15	5-15	74	23	0
15	5-15	75	23	0
15	5-15	76	23	0
15	5-15	77	23	0
15	5-15	78	23	0
15	5-15	79	23	0
15	5-15	80	23	0
15	5-15	81	19	0
15	5-15	82	19	0
15	5-15	83	19	0
15	5-15	84	19	0
15	5-15	85	19	0
15	5-15	86	19	0
15	5-15	87	19	0
15	5-15	88	19	0
15	5-15	89	19	0
15	5-15	90	19	0
15	5-15	91	19	0
15	5-15	92	19	0
15	5-15	93	19	0
15	5-15	94	19	0
15	5-15	95	14	0
15	5-15	96	14	0
15	5-15	97	14	0
15	5-15	98	14	0
15	5-15	99	14	0
15	5-15	100	14	0
15	5-15	101	14	0
15	5-15	102	14	0
15	5-15	103	14	0
15	5-15	104	14	0
15	5-15	105	14	0
15	5-15	106	14	0
15	5-15	107	14	0
15	5-15	108	9	0
15	5-15	109	9	0
15	5-15	110	9	0
15	5-15	111	9	0
15	5-15	112	9	0
15	5-15	113	9	0
15	5-15	114	9	0
15	5-15	115	9	0
15	5-15	116	9	0
15	5-15	117	9	0
15	5-15	118	9	0
15	5-15	119	9	0
15	5-15	120	9	0
15	5-15	121	9	0
15	5-15	122	9	0
15	5-15	123	9	0
15	5-15	124	9	0
15	5-15	125	9	0
15	5-15	126	9	0
15	5-15	127	9	0
15	5-15	128	9	0
15	5-15	129	9	0
15	5-15	130	9	0
15	5-15	131	9	0
15	5-15	132	9	0
15	5-15	133	9	0
15	5-15	134	9	0
15	5-15	135	9	0
15	5-15	136	9	0
15	5-15	137	9	0
15	5-15	138	9	0
15	5-15	139	9	0
15	5-15	140	9	0
13	6	1	36	1
13	6	2	36	1
13	6	3	36	1
13	6	4	36	1
13	6	5	36	1
13	6	6	36	1
13	6	7	36	1
13	6	8	36	1
13	6	9	36	1
13	6	10	36	1
13	6	11	36	1
13	6	12	36	1
13	6	13	36	1
13	6	14	36	1
13	6	15	36	1
13	6	16	36	1
13	6	17	36	1
13	6	18	36	1
13	6	19	36	1
13	6	20	32	0
13	6	21	32	0
13	6	22	32	0
13	6	23	29	0
13	6	24	25	0
13	6	25	25	0
13	6	26	25	0
13	6	27	25	0
13	6	28	25	0
13	6	29	25	0
13	6	30	25	0
13	6	31	25	0
13	6	32	21	0
13	6	33	21	0
13	6	34	21	0
13	6	35	21	0
13	6	36	21	0
13	6	37	21	0
13	6	38	21	0
13	6	39	21	0
13	6	40	21	0
13	6	41	21	0
13	6	42	21	0
13	6	43	16	0
13	6	44	16	0
13	6	45	16	0
13	6	46	16	0
13	6	47	11	0
13	6	48	11	0
13	6	49	11	0
13	6	50	11	0
13	6	51	11	0
13	6	52	11	0
13	6	53	11	0
13	6	54	11	0
13	6	55	11	0
13	6	56	11	0
13	6	57	11	0
13	6	58	11	0
13	6	59	11	0
13	6	60	11	0
13	6	61	11	0
13	6	62	11	0
13	6	63	11	0
13	6	64	11	0
13	6	65	11	0
13	6	66	11	0
13	6	67	11	0
13	6	68	11	0
13	6	69	11	0
13	6	70	3	0
13	6	71	3	0
13	6	72	3	0
13	6	73	3	0
13	6	74	3	0
13	6	75	3	0
13	6	76	3	0
13	6	77	3	0
13	6	78	3	0
13	6	79	3	0
13	6	80	3	0
13	6	81	3	0
13	6	82	3	0
13	6	83	3	0
13	6	84	3	0
13	6	85	3	0
13	6	86	3	0
13	6	87	3	0
13	6	88	3	0
13	6	89	3	0
13	6	90	3	0
13	6	91	3	0
13	6	92	3	0
13	6	93	3	0
13	6	94	3	0
13	6	95	3	0
13	6	96	3	0
13	6	97	3	0
13	6	98	3	0
13	6	99	3	0
13	6	100	3	0
13	6	101	3	0
13	6	102	3	0
13	6	103	3	0
13	6	104	3	0
13	6	105	3	0
13	6	106	3	0
13	6	107	3	0
13	6	108	1	0
13	6	109	1	0
13	6	110	1	0
13	6	111	1	0
15	7-15	1	36	1
15	7-15	2	36	1
15	7-15	3	36	1
15	7-15	4	36	1
15	7-15	5	36	1
15	7-15	6	36	1
15	7-15	7	36	1
15	7-15	8	36	1
15	7-15	9	36	1
15	7-15	10	36	1
15	7-15	11	36	1
15	7-15	12	36	1
15	7-15	13	36	1
15	7-15	14	32	0
15	7-15	15	32	0
15	7-15	16	32	0
15	7-15	17	32	0
15	7-15	18	32	0
15	7-15	19	32	0
15	7-15	20	32	0
15	7-15	21	32	0
15	7-15	22	29	0
15	7-15	23	29	0
15	7-15	24	29	0
15	7-15	25	29	0
15	7-15	26	25	0
15	7-15	27	25	0
15	7-15	28	25	0
15	7-15	29	25	0
15	7-15	30	25	0
15	7-15	31	25	0
15	7-15	32	21	0
15	7-15	33	21	0
15	7-15	34	21	0
15	7-15	35	21	0
15	7-15	36	21	0
15	7-15	37	21	0
15	7-15	38	21	0
15	7-15	39	21	0
15	7-15	40	21	0
15	7-15	41	21	0
15	7-15	42	21	0
15	7-15	43	16	0
15	7-15	44	16	0
15	7-15	45	16	0
15	7-15	46	16	0
15	7-15	47	16	0
15	7-15	48	16	0
15	7-15	49	16	0
15	7-15	50	16	0
15	7-15	51	16	0
15	7-15	52	16	0
15	7-15	53	16	0
15	7-15	54	16	0
15	7-15	55	16	0
15	7-15	56	16	0
15	7-15	57	16	0
15	7-15	58	11	0
15	7-15	59	11	0
15	7-15	60	11	0
15	7-15	61	11	0
15	7-15	62	11	0
15	7-15	63	11	0
15	7-15	64	11	0
15	7-15	65	11	0
15	7-15	66	11	0
15	7-15	67	11	0
15	7-15	68	11	0
15	7-15	69	11	0
15	7-15	70	11	0
15	7-15	71	11	0
15	7-15	72	11	0
15	7-15	73	11	0
15	7-15	74	11	0
15	7-15	75	11	0
15	7-15	76	11	0
15	7-15	77	11	0
15	7-15	78	11	0
15	7-15	79	11	0
15	7-15	80	11	0
15	7-15	81	11	0
15	7-15	82	11	0
15	7-15	83	11	0
15	7-15	84	11	0
15	7-15	85	11	0
15	7-15	86	11	0
15	7-15	87	11	0
15	7-15	88	3	0
15	7-15	89	3	0
15	7-15	90	3	0
15	7-15	91	3	0
15	7-15	92	3	0
15	7-15	93	3	0
15	7-15	94	3	0
15	7-15	95	3	0
15	7-15	96	3	0
15	7-15	97	3	0
15	7-15	98	3	0
15	7-15	99	3	0
15	7-15	100	3	0
15	7-15	101	3	0
15	7-15	102	3	0
15	7-15	103	3	0
15	7-15	104	3	0
15	7-15	105	3	0
15	7-15	106	3	0
15	7-15	107	3	0
15	7-15	108	3	0
15	7-15	109	3	0
15	7-15	110	3	0
15	7-15	111	1	0
15	7-15	112	1	0
15	7-15	113	1	0
15	7-15	114	1	0
15	7-15	115	1	0
15	7-15	116	1	0
15	7-15	117	1	0
15	7-15	118	1	0
15	7-15	119	1	0
15	7-15	120	1	0

## Sheet: Larval_stages
Batch	Temperature	DateCount	HourCount	DaysFromSpawn	Count	SamplesRemoved	FinalCount	Planula	Metamorphosed	Settled	Deformed
1	13	43796	12	1	15		15	15
2	13	43798	10	1	70		70	70
2-15	15	43798	11	1	15		15	15
3-15	15	43798	18	1	10		10	10
4	13	43799	11	1	40		40	40
4-15	15	43799	11	1	47		47	47
6	13	43802	10	1	111		111	111
7-15	15	43802	10	1	120		120	120
5	13	43804	10	1	110	3	107	110
5-15	15	43804	10	1	140	3	137	140
2	13	43799	12	2	55		55	55
2-15	15	43799	12	2	22		22	22
3-15	15	43799	12	2	9		9	9
4	13	43800	10	2	40	2	38	40
4-15	15	43800	10	2	44		44	44
1	13	43798	10	3	15		15	15
2	13	43800	10	3	53	3	50	53
2-15	15	43800	10	3	22	2	20	22
3-15	15	43800	10	3	8		8	8
4-15	15	43801	10	3	43	1	42	43
4	13	43801	10	3	46		46	46
6	13	43804	10	3	107		107	107
7-15	15	43804	10	3	110		110	110
1	13	43799	10	4	9		9	9
3-15	15	43801	10	4	8		8	8
2-15	15	43801	10	4	17		17	17
2	13	43801	10	4	40		40	40
4	13	43802	10	4	46		46	46
4-15	15	43802	10	4	44		44	44
1	13	43800	10	5	8		8	8
2	13	43802	10	5	40		40	40
2-15	15	43802	10	5	17		17	17
3-15	15	43802	10	5	6		6	6
1	13	43801	10	6	6		6	6
4	13	43804	10	6	36		36	36
4-15	15	43804	10	6	30		30	30
1	13	43802	10	7	6		6	6
2	13	43804	10	7	47		47	47
2-15	15	43804	10	7	19		19	19
5	13	43812	10	9	64	3		64
5-15	15	43812	10	9	140	3		140
6	13	43812	10	11	69			69
7-15	15	43812	10	11	87			87
4	13	43812	10	14	35			35
4-15	15	43812	10	14	24			24
5	13	43817	9	14	48	3		47		1
5-15	15	43817	9	14	107	3		107
2	13	43812	10	15	19			19
2-15	15	43812	10	15	6			6
6	13	43817	9	16	46			46
7-15	15	43817	9	16	57			57
4	13	43817	9	19	33			33
4-15	15	43817	9	19	17			17
5	13	43822	9	19	30	3		25		5
5-15	15	43822	9	19	94	3		94
2-15	15	43816	10	20	2			2
2	13	43817	9	20	12			12
6	13	43822	9	21	42			42
7-15	15	43822	9	21	42			41		1
5	13	43826	10	23	18	2		9	3	6
5-15	15	43826	10	23	80	4		75	5
4	13	43822	9	24	37			36		1
4-15	15	43822	9	24	10	1		8	2
6	13	43826	10	25	31			30	1	2
7-15	15	43826	10	25	31			27	3	1
5	13	43830	10	27	18			4	5	6	3
5-15	15	43830	10	27	67			57	8	2
4	13	43826	10	28	27	1		24	2	1
4-15	15	43826	10	28	8			8
6	13	43830	10	29	23			6	15	1	1
7-15	15	43830	10	29	25			15	6	3	1
5	13	43833	10	30	16	3		2	6	7	1
5-15	15	43833	10	30	48	3		29	17	2
4	13	43830	10	32	22	1		11	7	2
4-15	15	43830	10	32	6			1	5
6	13	43833	10	32	22			6	13	1	2
7-15	15	43833	10	32	21			9	8	3	1
5	13	43837	10	34	15			1	5	8	1
5-15	15	43837	10	34	30			13	14	2	1
4	13	43833	10	35	17	1		5	9	2	1
4-15	15	43833	10	35	6				5		1
6	13	43837	10	36	19			1	12	1	5
7-15	15	43837	10	36	13			3	6	2	2
4	13	43837	10	39	17			5	8	2	2
4-15	15	43837	10	39	3						3
5	13	43837	10	39	14			0	5	8	1

## Sheet: SwimmingBehaviour
TRACK_ID	Label	NUMBER_SPOTS	NUMBER_GAPS	LONGEST_GAP	NUMBER_SPLITS	NUMBER_MERGES	NUMBER_COMPLEX	TRACK_DURATION	TRACK_START	TRACK_STOP	TRACK_DISPLACEMENT	TRACK_INDEX	TRACK_X_LOCATION	TRACK_Y_LOCATION	TRACK_Z_LOCATION	TRACK_MEAN_SPEED	TRACK_MAX_SPEED	TRACK_MIN_SPEED	TRACK_MEDIAN_SPEED	TRACK_STD_SPEED	TRACK_MEAN_QUALITY	TRACK_MAX_QUALITY	TRACK_MIN_QUALITY	TRACK_MEDIAN_QUALITY	TRACK_STD_QUALITY	slope	Date	Batch	Temp	dir	daysfspawn
1	Track_1	12	0	0	0	0	0	11	0	11	0.107	1	76.96	57.398	0	0.04	0.077	0.006	0.032	0.024	9.096	9.436	7.974	9.246	0.417	-0.0132349	14-12-2019	B2-15	15°C	down	15
2	Track_2	37	0	0	0	0	0	36	0	36	6.666	2	75.779	57.638	0	0.257	0.713	0	0.163	0.248	10.391	15.813	8.099	9.381	1.76	0.00213986	14-12-2019	B2-15	15°C	up	15
3	Track_3	34	3	1	0	0	0	36	0	36	10.963	3	89.515	83.481	0	0.32	0.662	0	0.296	0.17	8.16	9.548	6.655	8.359	0.851	-0.0217688	14-12-2019	B2-15	15°C	down	15
4	Track_4	19	0	0	0	0	0	18	18	36	5.016	4	80.776	55.993	0	0.312	0.545	0	0.31	0.143	11.956	13.477	10.457	12.033	0.696	0.114186	14-12-2019	B2-15	15°C	up	15
1	Track_1	38	0	0	0	0	0	37	0	37	18.055	1	112.068	20.451	0	0.49	0.644	0	0.516	0.135	8.779	9.34	8.144	8.665	0.333	-0.298913	14-12-2019	B2-15	15°C	down	15
2	Track_2	38	0	0	0	0	0	37	0	37	12.102	2	100.869	57.142	0	0.384	0.778	0	0.396	0.157	10.168	11.073	9.128	10.111	0.452	0.0289678	14-12-2019	B2-15	15°C	up	15
3	Track_3	38	0	0	0	0	0	37	0	37	0.03	3	78.105	56.175	0	0.032	0.107	0	0.029	0.023	6.183	6.354	6.017	6.158	0.084	0.015204	14-12-2019	B2-15	15°C	up	15
4	Track_4	35	2	2	0	0	0	37	0	37	13.784	4	59.594	66.581	0	0.491	1.191	0	0.343	0.335	9.809	11.234	8.079	9.761	0.594	4.10329e-05	14-12-2019	B2-15	15°C	up	15
1	Track_1	48	0	0	0	0	0	47	0	47	10.784	1	50.296	72.491	0	0.282	0.611	0	0.255	0.115	14.361	15.793	12.207	14.465	0.853	0.00859944	14-12-2019	B2	13°C	up	15
2	Track_2	48	0	0	0	0	0	47	0	47	21.495	2	94.885	69.729	0	0.458	0.611	0	0.455	0.085	13.241	14.316	11.854	13.328	0.607	-0.105019	14-12-2019	B2	13°C	down	15
3	Track_3	46	1	2	0	0	0	47	0	47	14.053	3	124.938	34.831	0	0.348	0.674	0	0.287	0.172	12.749	14.323	11.156	13.199	0.996	-0.0729458	14-12-2019	B2	13°C	down	15
4	Track_4	48	0	0	0	0	0	47	0	47	7.335	4	116.655	83.926	0	0.268	0.544	0	0.27	0.147	15.55	17.814	12.25	15.571	1.044	0.0162388	14-12-2019	B2	13°C	up	15
5	Track_5	47	1	1	0	0	0	47	0	47	12.326	5	54.305	43.757	0	0.279	0.566	0	0.272	0.154	14.242	16.723	11.349	14.534	1.396	-0.0510886	14-12-2019	B2	13°C	down	15
6	Track_6	48	0	0	0	0	0	47	0	47	37.507	6	95.496	66.759	0	0.799	0.911	0	0.805	0.126	14.028	15.63	12.249	14.212	1.016	0.269003	14-12-2019	B2	13°C	up	15
7	Track_7	47	1	1	0	0	0	47	0	47	16.495	7	82.084	44.521	0	0.35	0.495	0	0.358	0.11	13.621	15.599	11.932	13.885	1.082	-0.0850243	14-12-2019	B2	13°C	down	15
8	Track_8	42	0	0	0	0	0	41	6	47	0.129	8	159.292	31.025	0	0.021	0.183	0	0.008	0.034	16.858	19.167	15.321	16.441	0.973	-0.22647	14-12-2019	B2	13°C	down	15
9	Track_9	18	1	3	0	0	0	20	6	26	2.591	9	161.26	31.79	0	0.133	0.454	0	0.117	0.089	20.189	26.425	17.243	20.066	2.244	-0.00181258	14-12-2019	B2	13°C	down	15
1	Track_1	46	1	1	0	0	0	46	0	46	19.06	1	55.432	63.041	0	0.422	0.667	0	0.406	0.149	10.509	11.063	9.707	10.53	0.348	0.37356	14-12-2019	B2	13°C	up	15
2	Track_2	39	1	1	0	0	0	39	0	39	23.884	2	111.907	25.138	0	0.625	0.863	0.389	0.647	0.136	12.202	18.144	9.696	11.783	1.74	0.111174	14-12-2019	B2	13°C	up	15
3	Track_3	46	1	1	0	0	0	46	0	46	9.48	3	71.951	62.833	0	0.205	0.325	0	0.198	0.064	10.628	11.423	9.658	10.62	0.407	-0.173426	14-12-2019	B2	13°C	down	15
4	Track_4	23	1	1	0	0	0	23	0	23	15.552	4	68.255	27.302	0	0.675	0.719	0.607	0.682	0.03	10.13	10.59	9.64	10.106	0.269	-0.052354	14-12-2019	B2	13°C	down	15
5	Track_5	47	0	0	0	0	0	46	0	46	8.934	5	89.298	38.629	0	0.196	0.285	0	0.23	0.067	12.321	12.901	11.468	12.35	0.359	-0.000804143	14-12-2019	B2	13°C	down	15
6	Track_6	47	0	0	0	0	0	46	0	46	10.784	6	51.06	59.736	0	0.238	0.503	0	0.225	0.136	14.627	16.15	12.636	14.659	0.799	0.00874977	14-12-2019	B2	13°C	up	15
7	Track_7	41	4	2	0	0	0	46	0	46	20.859	7	53.946	64.043	0	0.49	0.64	0	0.527	0.143	11.087	12.536	9.675	11.105	0.677	0.236897	14-12-2019	B2	13°C	up	15
8	Track_8	47	0	0	0	0	0	46	0	46	26.944	8	76.909	70.872	0	0.586	0.837	0	0.636	0.197	14.191	15.499	11.614	14.111	0.791	0.164984	14-12-2019	B2	13°C	up	15
1	Track_1	38	0	0	0	0	0	37	0	37	6.628	1	63.046	54.654	0	0.18	0.235	0	0.189	0.049	9.869	10.823	9.162	9.811	0.371	-0.0232922	14-12-2019	B2	13°C	down	15
2	Track_2	38	0	0	0	0	0	37	0	37	0	2	42.015	64.06	0	0.075	0.23	0	0.052	0.066	7.881	8.099	7.645	7.899	0.105	-0.15641	14-12-2019	B2	13°C	down	15
3	Track_3	38	0	0	0	0	0	37	0	37	11.824	3	104.178	36.708	0	0.32	0.373	0	0.335	0.079	12.098	12.524	11.588	12.13	0.281	-0.000215231	14-12-2019	B2	13°C	down	15
4	Track_4	38	0	0	0	0	0	37	0	37	17.433	4	55.701	27.052	0	0.49	0.607	0	0.515	0.123	13.676	14.654	12.852	13.685	0.442	0.00830704	14-12-2019	B2	13°C	up	15
5	Track_5	38	0	0	0	0	0	37	0	37	3.87	5	47.758	60.73	0	0.133	0.337	0	0.11	0.077	13.316	15.668	9.7	13.856	1.576	0.0990996	14-12-2019	B2	13°C	up	15
6	Track_6	3	0	0	0	0	0	2	0	2	0.659	6	44.241	32.07	0	0.329	0.339	0.32	0.339	0.013	5.15	5.198	5.105	5.148	0.038	-0.0790068	14-12-2019	B2	13°C	down	15
7	Track_7	37	1	1	0	0	0	37	0	37	2.757	7	92.326	69.52	0	0.074	0.131	0	0.072	0.028	13.27	14.099	12.434	13.248	0.439	0.255	14-12-2019	B2	13°C	up	15
1	Track_1	41	0	0	0	0	0	40	0	40	0.034	1	119.148	56.875	0	0.031	0.061	0	0.032	0.015	9.585	10.193	9.128	9.505	0.34	-0.313036	14-12-2019	B4-15	15°C	down	15
2	Track_2	41	0	0	0	0	0	40	0	40	3.913	2	80.047	18.928	0	0.244	0.575	0	0.253	0.168	8.054	11.859	7.118	7.778	1.036	-0.00101185	14-12-2019	B4-15	15°C	down	15
3	Track_3	41	0	0	0	0	0	40	0	40	13.317	3	106.255	60.907	0	0.355	0.698	0	0.369	0.189	10.974	12.447	9.283	11.003	0.494	-0.0222568	14-12-2019	B4-15	15°C	down	15
4	Track_4	41	0	0	0	0	0	40	0	40	0.04	4	82.732	60.512	0	0.032	0.08	0	0.032	0.018	11.219	11.589	10.981	11.23	0.154	0.22758	14-12-2019	B4-15	15°C	up	15
6	Track_6	41	0	0	0	0	0	40	0	40	0.051	6	48.02	52.586	0	0.03	0.074	0	0.03	0.015	9.774	10.957	9.234	9.551	0.48	-0.000530139	14-12-2019	B4-15	15°C	down	15
7	Track_7	41	0	0	0	0	0	40	0	40	22.423	7	38.548	22.846	0	0.566	0.84	0	0.619	0.194	8.508	10.214	6.88	8.53	0.8	0.305888	14-12-2019	B4-15	15°C	up	15
1	Track_1	46	0	0	0	0	0	45	0	45	18.344	1	91.484	50.895	0	0.436	0.549	0	0.477	0.121	8.1	8.923	7.31	8.04	0.398	0.044	14-12-2019	B4-15	15°C	up	15
2	Track_2	46	0	0	0	0	0	45	0	45	2.01	2	89.495	12.132	0	0.3	0.644	0	0.302	0.146	8.355	9.59	7.392	8.387	0.475	-0.410495	14-12-2019	B4-15	15°C	down	15
3	Track_3	46	0	0	0	0	0	45	0	45	3.607	3	80.87	57.151	0	0.098	0.167	0	0.102	0.035	7.967	8.638	7.623	7.915	0.278	-0.0261938	14-12-2019	B4-15	15°C	down	15
4	Track_4	4	0	0	0	0	0	3	0	3	2.123	4	24.756	69.972	0	0.708	0.747	0.656	0.721	0.047	8.132	8.456	7.704	8.201	0.271	-0.0838778	14-12-2019	B4-15	15°C	down	15
5	Track_5	46	0	0	0	0	0	45	0	45	15.269	5	70.666	19.169	0	0.433	0.845	0	0.372	0.238	9.028	9.628	8.254	9.045	0.363	0.083	14-12-2019	B4-15	15°C	up	15
6	Track_6	27	1	1	0	0	0	27	0	27	12.742	6	34.762	43.929	0	0.63	1.082	0.321	0.601	0.189	5.862	6.36	5.393	5.869	0.261	-0.148471	14-12-2019	B4-15	15°C	down	15
7	Track_7	46	0	0	0	0	0	45	0	45	0.005	7	83.193	58.94	0	0.009	0.047	0	0.005	0.01	9.964	10.189	9.62	10.003	0.14	0.0665006	14-12-2019	B4-15	15°C	up	15
9	Track_9	46	0	0	0	0	0	45	0	45	0.01	9	120.507	55.301	0	0.008	0.03	0	0.005	0.007	7.135	7.28	6.882	7.142	0.085	-0.000122726	14-12-2019	B4-15	15°C	down	15
10	Track_10	46	0	0	0	0	0	45	0	45	6.708	10	62.47	72.56	0	0.18	0.476	0	0.144	0.125	8.146	9.154	6.674	8.198	0.478	0.141863	14-12-2019	B4-15	15°C	up	15
11	Track_11	46	0	0	0	0	0	45	0	45	0	11	21.121	40.644	0	0.05	0.187	0	0	0.084	7.57	7.954	7.275	7.588	0.14	-0.00217965	14-12-2019	B4-15	15°C	down	15
13	Track_13	46	0	0	0	0	0	45	0	45	0.013	13	47.511	50.912	0	0.022	0.346	0	0.005	0.063	9.304	12.424	8.585	9.258	0.557	0.397	14-12-2019	B4-15	15°C	up	15
1	Track_1	41	0	0	0	0	0	40	0	40	11.621	1	64.1	23.996	0	0.313	0.553	0	0.282	0.108	7.897	8.697	7.131	7.86	0.42	-0.0262843	14-12-2019	B4-15	15°C	down	15
2	Track_2	41	0	0	0	0	0	40	0	40	29.377	2	106.303	25.991	0	0.739	0.911	0	0.798	0.176	7.447	9.004	6.5	7.286	0.686	0.0327537	14-12-2019	B4-15	15°C	up	15
3	Track_3	38	1	3	0	0	0	40	0	40	20.092	3	81.497	57.981	0	0.498	0.628	0	0.526	0.108	7.255	7.85	4.946	7.354	0.542	-0.042508	14-12-2019	B4-15	15°C	down	15
4	Track_4	41	0	0	0	0	0	40	0	40	0.022	4	86.493	33.619	0	0.011	0.025	0	0.011	0.006	3.819	3.976	3.72	3.802	0.058	-0.115704	14-12-2019	B4-15	15°C	down	15
5	Track_5	41	0	0	0	0	0	40	0	40	7.73	5	91.357	73.542	0	0.336	0.587	0	0.338	0.142	4.234	4.698	3.895	4.216	0.189	-0.000141638	14-12-2019	B4-15	15°C	down	15
1	Track_1	42	0	0	0	0	0	41	0	41	0.005	1	130.582	94.087	0	0.008	0.021	0	0.008	0.005	7.825	7.985	7.685	7.818	0.075	-0.0413755	14-12-2019	B4	13°C	down	15
2	Track_2	42	0	0	0	0	0	41	0	41	10.518	2	88.059	48.392	0	0.267	0.36	0	0.264	0.058	9.905	11.089	8.175	10.179	0.852	6.66072e-05	14-12-2019	B4	13°C	up	15
3	Track_3	42	0	0	0	0	0	41	0	41	17.383	3	69.867	47.17	0	0.449	0.66	0	0.432	0.118	11.873	12.742	10.75	12.031	0.483	0.156754	14-12-2019	B4	13°C	up	15
4	Track_4	42	0	0	0	0	0	41	0	41	2.355	4	34.58	56.878	0	0.281	0.513	0	0.282	0.131	10.751	11.831	9.237	10.898	0.507	-0.242004	14-12-2019	B4	13°C	down	15
5	Track_5	42	0	0	0	0	0	41	0	41	5.758	5	80.555	79.909	0	0.151	0.306	0	0.158	0.079	11.137	12.148	10.439	11.021	0.498	0.0501381	14-12-2019	B4	13°C	up	15
6	Track_6	40	2	1	0	0	0	41	0	41	5.704	6	96.97	88.791	0	0.149	0.35	0	0.136	0.066	8.622	13.623	6.82	8.347	1.13	0.117019	14-12-2019	B4	13°C	up	15
7	Track_7	42	0	0	0	0	0	41	0	41	0.002	7	51.461	70.065	0	0.006	0.012	0	0.006	0.003	10.379	10.563	10.117	10.409	0.106	0.042657	14-12-2019	B4	13°C	up	15
8	Track_8	42	0	0	0	0	0	41	0	41	0.01	8	138.582	57.784	0	0.009	0.026	0	0.009	0.006	8.719	8.891	8.582	8.723	0.071	-6.35281e-05	14-12-2019	B4	13°C	down	15
9	Track_9	41	0	0	0	0	0	40	1	41	0.015	9	48.369	48.104	0	0.006	0.014	0	0.006	0.004	10.731	11.02	10.41	10.738	0.141	-2.84418e-05	14-12-2019	B4	13°C	down	15
10	Track_10	40	0	0	0	0	0	39	2	41	0.004	10	46.411	46.584	0	0.005	0.015	0	0.004	0.003	11.626	11.796	11.402	11.648	0.099	-0.000228397	14-12-2019	B4	13°C	down	15
11	Track_11	39	1	1	0	0	0	39	2	41	0.032	11	45.129	50.906	0	0.01	0.038	0	0.009	0.008	10.267	10.523	9.99	10.272	0.125	0.000205159	14-12-2019	B4	13°C	up	15
12	Track_12	9	1	1	0	0	0	9	13	22	0.016	12	30.812	36.263	0	0.006	0.012	0.003	0.006	0.003	6.176	6.285	6.121	6.169	0.045	0.00123153	14-12-2019	B4	13°C	up	15
13	Track_13	2	0	0	0	0	0	1	31	32	0.009	13	30.815	36.268	0	0.009	0.009	0.009	0.009	NA	6.148	6.168	6.128	6.168	0.02	0.00136216	14-12-2019	B4	13°C	up	15
14	Track_14	9	0	0	0	0	0	8	33	41	2.328	14	49.958	17.805	0	0.305	0.389	0	0.343	0.126	8.228	8.571	7.591	8.339	0.284	-0.009	14-12-2019	B4	13°C	down	15
15	Track_15	2	0	0	0	0	0	1	36	37	0.011	15	30.818	36.263	0	0.011	0.011	0.011	0.011	NA	6.12	6.133	6.106	6.133	0.014	0.00956667	14-12-2019	B4	13°C	up	15
16	Track_16	2	0	0	0	0	0	1	40	41	0	16	47.776	47.492	0	0	0	0	0	NA	8.238	8.238	8.238	8.238	0	0.005	14-12-2019	B4	13°C	up	15
1	Track_1	55	0	0	0	0	0	54	1	55	0	1	31.304	15.093	0	0	0	0	0	0	6.981	7.305	6.437	6.995	0.156	-0.018092	14-12-2019	B4	13°C	down	15
3	Track_3	56	0	0	0	0	0	55	0	55	8.426	3	51.875	24.59	0	0.283	0.514	0	0.296	0.143	10.57	11.792	8.665	10.677	0.709	0.0644881	14-12-2019	B4	13°C	up	15
5	Track_5	56	0	0	0	0	0	55	0	55	19.501	5	48.12	47.191	0	0.381	0.514	0	0.402	0.094	7.741	9.922	5.816	7.846	0.861	-4.85304e-06	14-12-2019	B4	13°C	down	15
6	Track_6	56	0	0	0	0	0	55	0	55	0.01	6	30.564	36.156	0	0.009	0.024	0	0.009	0.006	6.415	6.764	6.237	6.405	0.084	-0.0494697	14-12-2019	B4	13°C	down	15
7	Track_7	55	1	1	0	0	0	55	0	55	13.869	7	61.937	57.684	0	0.335	0.742	0	0.351	0.118	11.723	13.415	9.189	11.764	0.716	0.00026162	14-12-2019	B4	13°C	up	15
8	Track_8	56	0	0	0	0	0	55	0	55	0.035	8	37.104	29.443	0	0.029	0.131	0	0.02	0.026	5.996	6.292	5.816	5.989	0.096	0.000210663	14-12-2019	B4	13°C	up	15
9	Track_9	56	0	0	0	0	0	55	0	55	0.022	9	30.166	29.631	0	0.012	0.033	0	0.01	0.009	5.29	5.596	5.06	5.282	0.114	0.0697302	14-12-2019	B4	13°C	up	15
10	Track_10	56	0	0	0	0	0	55	0	55	7.472	10	105.1	66.173	0	0.201	0.576	0	0.122	0.161	6.467	7.324	5.006	6.594	0.575	-0.0393307	14-12-2019	B4	13°C	down	15
11	Track_11	56	0	0	0	0	0	55	0	55	27.196	11	102.791	16	0	0.503	0.771	0	0.527	0.187	9.355	11.543	7.301	9.405	1.086	-0.0569417	14-12-2019	B4	13°C	down	15
12	Track_12	49	0	0	0	0	0	48	0	48	16.645	12	76.208	59.835	0	0.376	0.578	0.242	0.37	0.083	10.075	11.975	8.533	10.091	0.691	2.08476e-06	14-12-2019	B4	13°C	up	15
13	Track_13	56	0	0	0	0	0	55	0	55	0.002	13	51.258	70.235	0	0.006	0.017	0	0.006	0.004	10.029	10.405	9.78	10.03	0.093	0.000253213	14-12-2019	B4	13°C	up	15
14	Track_14	51	0	0	0	0	0	50	5	55	0.009	14	48.217	48.331	0	0.008	0.026	0	0.007	0.005	9.971	10.561	9.386	9.985	0.242	-0.000718733	14-12-2019	B4	13°C	down	15
15	Track_15	51	0	0	0	0	0	50	5	55	0.054	15	47.541	47.526	0	0.009	0.033	0	0.009	0.006	8.223	8.739	7.295	8.234	0.314	-0.0008	14-12-2019	B4	13°C	down	15
16	Track_16	51	0	0	0	0	0	50	5	55	0.041	16	44.881	51.092	0	0.009	0.033	0	0.007	0.007	9.837	10.367	9.431	9.78	0.24	0.000311131	14-12-2019	B4	13°C	up	15
17	Track_17	51	0	0	0	0	0	50	5	55	0.008	17	46.165	46.702	0	0.007	0.021	0	0.006	0.005	11.556	11.748	11.157	11.582	0.127	0.00200568	14-12-2019	B4	13°C	up	15
1	Track_1	57	0	0	0	0	0	56	0	56	18.297	1	66.075	34.973	0	0.394	0.899	0	0.29	0.261	11.719	13.081	8.179	12.053	1.038	-0.099	14-12-2019	B4	13°C	down	15
2	Track_2	57	0	0	0	0	0	56	0	56	6.637	2	116.191	68.652	0	0.185	0.265	0	0.197	0.052	8.279	9.667	6.372	8.433	0.79	0.158013	14-12-2019	B4	13°C	up	15
3	Track_3	57	0	0	0	0	0	56	0	56	25.315	3	111.343	61.936	0	0.494	0.809	0	0.478	0.117	11.394	12.737	9.429	11.342	0.629	-0.12497	14-12-2019	B4	13°C	down	15
4	Track_4	51	4	3	0	0	0	56	0	56	13.928	4	108.717	82.52	0	0.262	0.388	0	0.31	0.111	7.388	8.346	6.266	7.547	0.572	0.0206572	14-12-2019	B4	13°C	up	15
5	Track_5	57	0	0	0	0	0	56	0	56	21.364	5	119.563	61.473	0	0.428	0.903	0	0.434	0.182	9.695	11.046	8.006	9.76	0.783	-0.0466471	14-12-2019	B4	13°C	down	15
6	Track_6	35	0	0	0	0	0	34	0	34	3.77	6	84.945	83.87	0	0.288	0.611	0.07	0.245	0.141	10.051	10.859	9.118	10.062	0.433	-0.0380686	14-12-2019	B4	13°C	down	15
7	Track_7	56	1	1	0	0	0	56	0	56	11.612	7	42.345	18.039	0	0.217	0.526	0	0.204	0.078	9.43	13.911	6.127	9.379	1.724	0.112386	14-12-2019	B4	13°C	up	15
8	Track_8	57	0	0	0	0	0	56	0	56	0.007	8	33.127	34.237	0	0.009	0.019	0	0.007	0.005	7.041	7.171	6.911	7.045	0.061	-0.032321	14-12-2019	B4	13°C	down	15
9	Track_9	57	0	0	0	0	0	56	0	56	39.663	9	97.539	48.904	0	0.719	1.032	0	0.732	0.202	11.16	12.262	9.643	11.207	0.555	7.15582e-05	14-12-2019	B4	13°C	up	15
10	Track_10	57	0	0	0	0	0	56	0	56	22.846	10	39.922	36.113	0	0.419	0.667	0	0.49	0.173	11.291	12.569	9.789	11.299	0.582	0.0614675	14-12-2019	B4	13°C	up	15
11	Track_11	57	0	0	0	0	0	56	0	56	38.925	11	79.099	53.237	0	0.781	1.041	0	0.815	0.209	9.988	11.202	8.199	10.033	0.683	-0.0686197	14-12-2019	B4	13°C	down	15
12	Track_12	57	0	0	0	0	0	56	0	56	0.007	12	53.673	68.178	0	0.007	0.023	0	0.005	0.005	10.431	10.612	10.184	10.424	0.078	0.0588697	14-12-2019	B4	13°C	up	15
13	Track_13	57	0	0	0	0	0	56	0	56	14.83	13	114.346	60.629	0	0.306	0.45	0	0.356	0.116	11.388	12.831	9.895	11.305	0.701	3.43531e-05	14-12-2019	B4	13°C	up	15
14	Track_14	16	0	0	0	0	0	15	11	26	2.557	14	143.022	28.222	0	0.171	0.301	0.035	0.17	0.072	12.903	15.096	7.013	14.241	2.493	-0.0278544	14-12-2019	B4	13°C	down	15
15	Track_15	39	0	0	0	0	0	38	18	56	13.701	15	47.162	25.618	0	0.365	0.447	0	0.377	0.07	12.256	13.654	10.239	12.349	0.62	0.176659	14-12-2019	B4	13°C	up	15
16	Track_16	24	1	2	0	0	0	25	31	56	11.622	16	123.821	49.457	0	0.472	0.599	0	0.494	0.124	12.374	13.617	10.216	12.841	1.093	-0.152834	14-12-2019	B4	13°C	down	15
17	Track_17	5	1	1	0	0	0	5	51	56	0.24	17	142.616	31.714	0	0.045	0.064	0	0.061	0.03	15.485	15.637	15.317	15.424	0.129	-0.0518678	14-12-2019	B4	13°C	down	15
1	Track_1	49	1	1	0	0	0	49	0	49	26.044	1	99.527	48.69	0	0.606	1.054	0	0.597	0.191	11.661	12.236	10.242	11.789	0.413	-0.110188	14-12-2019	B5	13°C	down	15
2	Track_2	50	0	0	0	0	0	49	0	49	12.878	2	73.523	77.898	0	0.338	0.595	0	0.401	0.177	8.982	10.254	7.273	9.127	0.669	-0.0276338	14-12-2019	B5	13°C	down	15
3	Track_3	50	0	0	0	0	0	49	0	49	21.499	3	90.656	48.848	0	0.469	0.582	0	0.491	0.109	10.873	12.415	8.601	10.991	0.855	0.160175	14-12-2019	B5	13°C	up	15
4	Track_4	50	0	0	0	0	0	49	0	49	8.606	4	95.263	39.473	0	0.187	0.242	0	0.192	0.042	12.625	13.086	11.941	12.658	0.276	0.00707544	14-12-2019	B5	13°C	up	15
5	Track_5	5	0	0	0	0	0	4	0	4	3.762	5	66.489	13.932	0	0.941	0.993	0.878	0.986	0.058	8.2	8.432	7.69	8.411	0.292	-0.0337976	14-12-2019	B5	13°C	down	15
6	Track_6	50	0	0	0	0	0	49	0	49	0	6	117.99	86.209	0	0	0	0	0	0	18.77	19.451	17.604	18.816	0.252	-0.0811	14-12-2019	B5	13°C	down	15
7	Track_7	50	0	0	0	0	0	49	0	49	12.04	7	101.136	51.479	0	0.317	0.502	0	0.328	0.091	10.455	12.209	8.883	10.47	0.745	1.41862e-15	14-12-2019	B5	13°C	up	15
8	Track_8	45	3	3	0	0	0	49	0	49	13.754	8	75.138	73.214	0	0.283	0.401	0	0.299	0.085	14.297	15.136	13.358	14.287	0.319	0.000540984	14-12-2019	B5	13°C	up	15
9	Track_9	37	1	2	0	0	0	38	0	38	3.826	9	140.653	74.519	0	0.143	0.597	0.011	0.122	0.137	10.345	11.69	8.191	10.444	0.824	0.0639201	14-12-2019	B5	13°C	up	15
10	Track_10	13	0	0	0	0	0	12	0	12	4.1	10	117.295	26.173	0	0.342	0.524	0.108	0.389	0.14	11.717	12.622	9.64	11.822	0.862	0.0757675	14-12-2019	B5	13°C	up	15
11	Track_11	50	0	0	0	0	0	49	0	49	9.774	11	66.562	63.924	0	0.201	0.35	0	0.239	0.113	10.813	11.698	10.107	10.84	0.367	-0.349626	14-12-2019	B5	13°C	down	15
12	Track_12	50	0	0	0	0	0	49	0	49	0.01	12	131.665	17.276	0	0.009	0.032	0	0.007	0.008	7.999	8.195	7.843	7.994	0.072	-0.0791544	14-12-2019	B5	13°C	down	15
13	Track_13	50	0	0	0	0	0	49	0	49	0.009	13	135.783	52.782	0	0.009	0.036	0	0.007	0.008	10.173	10.343	10.021	10.174	0.082	-0.000193517	14-12-2019	B5	13°C	down	15
14	Track_14	50	0	0	0	0	0	49	0	49	13.196	14	66.231	32.205	0	0.33	0.622	0	0.329	0.146	12.347	14.007	10.633	12.441	0.849	-0.000110444	14-12-2019	B5	13°C	down	15
15	Track_15	50	0	0	0	0	0	49	0	49	18.352	15	40.605	45.764	0	0.397	0.774	0	0.399	0.174	11.629	13.063	10.559	11.735	0.571	-0.0445636	14-12-2019	B5	13°C	down	15
16	Track_16	50	0	0	0	0	0	49	0	49	10.671	16	96.975	15.16	0	0.226	0.359	0	0.23	0.084	12.692	13.159	12.071	12.7	0.291	0.21368	14-12-2019	B5	13°C	up	15
17	Track_17	50	0	0	0	0	0	49	0	49	21.319	17	43.142	59.91	0	0.437	0.862	0	0.453	0.273	11.302	12.077	10.698	11.312	0.267	-0.00983275	14-12-2019	B5	13°C	down	15
18	Track_18	50	0	0	0	0	0	49	0	49	0	18	77.259	12.603	0	0	0	0	0	0	8.103	8.579	7.797	8.095	0.182	-0.0449072	14-12-2019	B5	13°C	down	15
19	Track_19	50	0	0	0	0	0	49	0	49	0.002	19	55.217	18.537	0	0.008	0.033	0	0.004	0.008	10.988	11.171	10.87	10.98	0.061	1.18219e-16	14-12-2019	B5	13°C	up	15
20	Track_20	50	0	0	0	0	0	49	0	49	12.922	20	36.786	17.51	0	0.305	0.459	0	0.295	0.101	10.633	12.781	9.204	10.652	0.714	-9.93517e-05	14-12-2019	B5	13°C	down	15
21	Track_21	50	0	0	0	0	0	49	0	49	5.96	21	46.041	26.528	0	0.146	0.297	0	0.143	0.054	11.518	13.665	8.352	11.726	1.046	0.120438	14-12-2019	B5	13°C	up	15
22	Track_22	49	0	0	0	0	0	48	1	49	33.828	22	52.643	27.521	0	0.719	0.962	0	0.717	0.173	13.264	14.779	9.302	13.4	0.828	0.114768	14-12-2019	B5	13°C	up	15
23	Track_23	50	0	0	0	0	0	49	0	49	22.774	23	55.918	31.09	0	0.472	0.77	0	0.462	0.196	11.02	11.704	9.907	11.107	0.432	0.102496	14-12-2019	B5	13°C	up	15
24	Track_24	50	0	0	0	0	0	49	0	49	25.63	24	72.636	21.188	0	0.526	0.662	0	0.551	0.131	8.693	9.952	7.282	8.766	0.739	-0.0229029	14-12-2019	B5	13°C	down	15
25	Track_25	50	0	0	0	0	0	49	0	49	21.757	25	50.719	37.066	0	0.523	0.903	0	0.504	0.219	11.194	11.873	10.517	11.268	0.314	-0.0111023	14-12-2019	B5	13°C	down	15
26	Track_26	50	0	0	0	0	0	49	0	49	0.975	26	101.115	53.109	0	0.129	0.252	0	0.138	0.064	11.727	12.631	10.582	11.832	0.511	-0.0143693	14-12-2019	B5	13°C	down	15
27	Track_27	2	0	0	0	0	0	1	0	1	0.164	27	139.699	78.689	0	0.164	0.164	0.164	0.164	NA	9.513	9.93	9.095	9.93	0.418	0.00286286	14-12-2019	B5	13°C	up	15
28	Track_28	43	0	0	0	0	0	42	7	49	2.12	28	138.258	21.333	0	0.06	0.148	0	0.038	0.053	8.941	10.182	7.429	8.927	0.69	0.087	14-12-2019	B5	13°C	up	15
29	Track_29	36	2	4	0	0	0	40	9	49	6.652	29	35.246	34.993	0	0.282	0.447	0	0.311	0.123	14.043	14.627	12.932	14.13	0.442	-0.0158275	14-12-2019	B5	13°C	down	15
30	Track_30	26	3	1	0	0	0	28	21	49	14.059	30	38.033	13.936	0	0.485	0.896	0	0.551	0.275	9.007	10.472	7.783	8.411	1.025	0.0951928	14-12-2019	B5	13°C	up	15
31	Track_31	23	0	0	0	0	0	22	27	49	8.393	31	111.664	18.948	0	0.399	0.574	0	0.425	0.16	12.572	13.744	10.949	12.459	0.83	0.0756569	14-12-2019	B5	13°C	up	15
32	Track_32	2	0	0	0	0	0	1	38	39	0	32	45.844	12.603	0	0	0	0	0	NA	7.27	7.301	7.24	7.301	0.03	-0.240424	14-12-2019	B5	13°C	down	15
1	Track_1	51	0	0	0	0	0	50	0	50	6.76	1	118.423	83.52	0	0.159	0.257	0	0.16	0.045	12.073	12.911	10.608	12.124	0.553	-0.0588815	14-12-2019	B5	13°C	down	15
2	Track_2	51	0	0	0	0	0	50	0	50	3.792	2	64.196	29.783	0	0.179	0.322	0	0.2	0.074	12.67	13.393	11.747	12.727	0.466	0.0643537	14-12-2019	B5	13°C	up	15
3	Track_3	51	0	0	0	0	0	50	0	50	1.289	3	107.858	83.188	0	0.148	0.516	0	0.148	0.101	8.637	9.574	7.815	8.614	0.348	-0.0230623	14-12-2019	B5	13°C	down	15
4	Track_4	51	0	0	0	0	0	50	0	50	26.974	4	99.597	87.754	0	0.541	0.648	0	0.55	0.094	8.926	9.59	8.278	8.979	0.302	0.0444955	14-12-2019	B5	13°C	up	15
5	Track_5	46	0	0	0	0	0	45	0	45	9.644	5	127.279	85.127	0	0.246	0.504	0.073	0.236	0.116	11.338	13.593	7.928	11.321	1.402	0.0263965	14-12-2019	B5	13°C	up	15
6	Track_6	51	0	0	0	0	0	50	0	50	22.58	6	63.916	35.46	0	0.463	0.596	0	0.463	0.078	13.773	14.436	13.195	13.771	0.267	0.184521	14-12-2019	B5	13°C	up	15
7	Track_7	51	0	0	0	0	0	50	0	50	11.883	7	44.478	60.406	0	0.238	0.305	0	0.247	0.05	11.972	12.44	11.537	11.962	0.187	-0.0643125	14-12-2019	B5	13°C	down	15
8	Track_8	51	0	0	0	0	0	50	0	50	7.889	8	85.695	40.687	0	0.163	0.437	0	0.151	0.096	10.435	11.616	8.947	10.498	0.519	-0.0384124	14-12-2019	B5	13°C	down	15
9	Track_9	51	0	0	0	0	0	50	0	50	5.173	9	31.11	71.373	0	0.205	0.418	0	0.203	0.103	9.865	11.285	8.153	9.888	0.621	-0.117044	14-12-2019	B5	13°C	down	15
10	Track_10	51	0	0	0	0	0	50	0	50	8.119	10	34.365	34.778	0	0.168	0.254	0	0.178	0.056	10.885	12.26	9.123	10.992	0.616	-0.0866722	14-12-2019	B5	13°C	down	15
11	Track_11	51	0	0	0	0	0	50	0	50	5.654	11	112.351	57.962	0	0.175	0.363	0	0.178	0.077	11.299	12.119	10.395	11.258	0.436	0.14017	14-12-2019	B5	13°C	up	15
12	Track_12	9	1	1	0	0	0	9	0	9	2.159	12	142.627	26.603	0	0.256	0.377	0.144	0.26	0.08	10.187	14.954	8.892	9.626	1.727	0.0257325	14-12-2019	B5	13°C	up	15
13	Track_13	51	0	0	0	0	0	50	0	50	4	13	139.935	42.048	0	0.094	0.159	0	0.086	0.03	10.369	12.275	8.282	10.429	0.934	0.113822	14-12-2019	B5	13°C	up	15
14	Track_14	49	0	0	0	0	0	48	0	48	6.303	14	125.004	67.848	0	0.143	0.417	0.055	0.126	0.077	10.152	16.313	8.014	9.796	1.684	-0.0392192	14-12-2019	B5	13°C	down	15
15	Track_15	51	0	0	0	0	0	50	0	50	0.009	15	133.724	20.998	0	0.007	0.022	0	0.005	0.005	8.391	8.526	8.236	8.391	0.069	0.0642389	14-12-2019	B5	13°C	up	15
16	Track_16	6	1	1	0	0	0	6	0	6	2.001	16	137.111	52.242	0	0.344	0.414	0.306	0.313	0.049	10.76	12.794	8.589	11.3	1.466	7.71946e-05	14-12-2019	B5	13°C	up	15
17	Track_17	51	0	0	0	0	0	50	0	50	18.266	17	89.51	62.729	0	0.366	0.433	0	0.375	0.06	10.575	11.387	9.93	10.563	0.331	0.314255	14-12-2019	B5	13°C	up	15
18	Track_18	51	0	0	0	0	0	50	0	50	5.911	18	74.402	52.242	0	0.204	0.316	0	0.211	0.064	10.115	10.976	8.798	10.118	0.538	-0.0897319	14-12-2019	B5	13°C	down	15
19	Track_19	43	6	3	0	0	0	50	0	50	5.55	19	44.77	21.652	0	0.292	0.424	0	0.298	0.088	9.028	11.063	7.097	8.965	1.228	0.011375	14-12-2019	B5	13°C	up	15
20	Track_20	51	0	0	0	0	0	50	0	50	9.566	20	56.939	46.247	0	0.218	0.381	0	0.208	0.078	11.937	12.981	10.722	12.048	0.482	0.0236354	14-12-2019	B5	13°C	up	15
21	Track_21	51	0	0	0	0	0	50	0	50	12.431	21	125.186	53.109	0	0.26	0.434	0	0.25	0.063	8.984	11.857	7.434	8.792	0.802	-0.115848	14-12-2019	B5	13°C	down	15
22	Track_22	51	0	0	0	0	0	50	0	50	11.311	22	93.724	27.351	0	0.285	0.531	0	0.268	0.119	12.786	13.679	11.469	12.871	0.567	0.0137656	14-12-2019	B5	13°C	up	15
23	Track_23	41	0	0	0	0	0	40	0	40	7.22	23	47.522	29.386	0	0.192	0.266	0.137	0.193	0.025	11.423	12.25	8.767	11.565	0.681	0.0832363	14-12-2019	B5	13°C	up	15
24	Track_24	49	2	1	0	0	0	50	0	50	30.132	24	104.176	33.659	0	0.614	0.773	0	0.667	0.146	11.692	13.903	9.239	11.49	0.944	-0.0542328	14-12-2019	B5	13°C	down	15
25	Track_25	27	1	1	0	0	0	27	0	27	0.939	25	91.73	42.002	0	0.086	0.138	0.023	0.091	0.03	11.951	12.587	11.277	11.897	0.331	0.0303067	14-12-2019	B5	13°C	up	15
26	Track_26	51	0	0	0	0	0	50	0	50	3.957	26	95.881	56.106	0	0.237	0.396	0	0.26	0.103	10.391	11.679	8.886	10.477	0.657	0.0181781	14-12-2019	B5	13°C	up	15
27	Track_27	51	0	0	0	0	0	50	0	50	10.239	27	52.224	23.913	0	0.37	0.563	0	0.38	0.117	9.743	11.602	7.789	9.754	1.015	0.0176576	14-12-2019	B5	13°C	up	15
28	Track_28	27	1	6	0	0	0	32	0	32	4.451	28	135.86	78.677	0	0.177	0.42	0.091	0.163	0.07	7.598	8.263	7.056	7.52	0.326	0.15621	14-12-2019	B5	13°C	up	15
29	Track_29	48	1	3	0	0	0	50	0	50	14.401	29	104.725	89.925	0	0.292	0.501	0	0.285	0.084	8.198	8.998	7.158	8.197	0.419	0.0834655	14-12-2019	B5	13°C	up	15
30	Track_30	43	1	8	0	0	0	50	0	50	2.301	30	43.463	28.536	0	0.104	0.254	0	0.113	0.063	11.16	11.871	10.037	11.238	0.417	0.0442781	14-12-2019	B5	13°C	up	15
31	Track_31	13	0	0	0	0	0	12	1	13	0.426	31	140.741	49.499	0	0.037	0.074	0.019	0.038	0.016	7.309	7.513	7.115	7.285	0.12	-0.0302843	14-12-2019	B5	13°C	down	15
32	Track_32	2	0	0	0	0	0	1	2	3	0.745	32	101.359	92.043	0	0.745	0.745	0.745	0.745	NA	9.808	11.886	7.731	11.886	2.077	-0.0321264	14-12-2019	B5	13°C	down	15
33	Track_33	48	1	2	0	0	0	49	1	50	17.916	33	59.135	20.806	0	0.529	0.648	0	0.583	0.128	10.499	13.745	7.5	10.873	1.067	2.00972e-14	14-12-2019	B5	13°C	up	15
34	Track_34	25	2	1	0	0	0	26	24	50	0.539	34	141.174	49.229	0	0.023	0.043	0	0.026	0.01	7.53	8.04	7.04	7.511	0.318	-0.0178554	14-12-2019	B5	13°C	down	15
1	Track_1	45	1	1	0	0	0	45	0	45	16.291	1	69.006	59.454	0	0.472	1.002	0	0.457	0.226	17.124	18.437	15.1	17.251	0.768	0.133704	14-12-2019	B6-15	15°C	up	15
2	Track_2	2	0	0	0	0	0	1	0	1	0.049	2	35.605	41.728	0	0.049	0.049	0.049	0.049	NA	8.501	8.577	8.425	8.577	0.076	-0.211098	14-12-2019	B6-15	15°C	down	15
3	Track_3	41	2	3	0	0	0	45	0	45	7.116	3	125.52	96.298	0	0.292	0.543	0	0.332	0.144	14.342	16.069	10.791	14.569	1.325	-0.046	14-12-2019	B6-15	15°C	down	15
4	Track_4	46	0	0	0	0	0	45	0	45	19.813	4	106.781	78.315	0	0.542	0.686	0	0.569	0.133	16.921	18.422	14.667	17.214	1.006	0.16954	14-12-2019	B6-15	15°C	up	15
5	Track_5	35	0	0	0	0	0	34	0	34	10.687	5	40.704	32.904	0	0.321	0.469	0.23	0.319	0.06	13.444	15.213	10.684	13.448	1.034	-0.0449631	14-12-2019	B6-15	15°C	down	15
6	Track_6	45	1	1	0	0	0	45	0	45	26.117	6	70.103	62.998	0	0.598	0.787	0	0.625	0.155	16.846	18.957	14.935	17.026	1.186	0.155624	14-12-2019	B6-15	15°C	up	15
7	Track_7	15	0	0	0	0	0	14	0	14	11.107	7	125.581	46.885	0	0.801	0.986	0.572	0.828	0.096	17.827	19.136	13.486	18.199	1.355	0.107356	14-12-2019	B6-15	15°C	up	15
8	Track_8	43	1	3	0	0	0	45	0	45	35.74	8	101.853	54.844	0	0.801	1.069	0	0.833	0.229	16.203	16.928	14.353	16.279	0.501	-0.120146	14-12-2019	B6-15	15°C	down	15
9	Track_9	46	0	0	0	0	0	45	0	45	9.821	9	55.754	84.586	0	0.24	0.544	0	0.24	0.104	17.199	18.184	16.337	17.139	0.527	0.0432576	14-12-2019	B6-15	15°C	up	15
10	Track_10	39	1	1	0	0	0	39	0	39	16.568	10	108.122	99.163	0	0.778	1.065	0.095	0.856	0.203	10.729	15.887	8.445	10.251	1.937	-0.14316	14-12-2019	B6-15	15°C	down	15
11	Track_11	41	3	2	0	0	0	45	0	45	0.605	11	29.754	53.889	0	0.139	1.774	0	0.051	0.38	9.446	12.554	8.371	9.258	0.951	-0.00302485	14-12-2019	B6-15	15°C	down	15
12	Track_12	46	0	0	0	0	0	45	0	45	7.132	12	109.165	54.913	0	0.21	0.487	0	0.192	0.143	15.626	19.073	13.7	15.628	0.913	0.0186734	14-12-2019	B6-15	15°C	up	15
13	Track_13	40	2	4	0	0	0	45	0	45	12.929	13	56.479	53.704	0	0.401	0.911	0	0.294	0.259	18.737	20.015	17.334	18.788	0.662	0.0468074	14-12-2019	B6-15	15°C	up	15
14	Track_14	40	0	0	0	0	0	39	0	39	10.8	14	68.828	73.427	0	0.281	0.386	0.179	0.284	0.048	16.308	17.6	14.795	16.458	0.693	0.0246752	14-12-2019	B6-15	15°C	up	15
15	Track_15	41	1	5	0	0	0	45	0	45	18.977	15	140.841	87.385	0	0.648	1.983	0	0.649	0.334	11.768	14.113	8.762	11.511	1.359	0.104604	14-12-2019	B6-15	15°C	up	15
16	Track_16	19	1	1	0	0	0	19	0	19	12.708	16	108.189	34.897	0	0.681	0.775	0.576	0.67	0.061	8.997	9.601	8.533	8.962	0.303	-0.00641746	14-12-2019	B6-15	15°C	down	15
17	Track_17	46	0	0	0	0	0	45	0	45	12.409	17	64.298	74.469	0	0.33	0.606	0	0.358	0.155	17.429	18.595	15.059	17.582	0.874	0.0296311	14-12-2019	B6-15	15°C	up	15
18	Track_18	46	0	0	0	0	0	45	0	45	3.069	18	54.412	64.392	0	0.145	0.271	0	0.147	0.075	19.216	20.022	17.796	19.307	0.552	0.248006	14-12-2019	B6-15	15°C	up	15
19	Track_19	46	0	0	0	0	0	45	0	45	4.905	19	85.008	85.587	0	0.261	0.471	0	0.278	0.119	17.265	18.361	15.991	17.389	0.598	0.0414344	14-12-2019	B6-15	15°C	up	15
20	Track_20	44	1	2	0	0	0	45	0	45	10.38	20	72.616	59.569	0	0.868	1.332	0	0.82	0.311	16.126	19.572	11.257	17.043	2.393	-0.0541173	14-12-2019	B6-15	15°C	down	15
21	Track_21	31	0	0	0	0	0	30	0	30	23.359	21	121.368	92.125	0	0.799	1.014	0.405	0.879	0.172	15.592	18.276	10.602	16.12	1.792	-0.0852264	14-12-2019	B6-15	15°C	down	15
22	Track_22	46	0	0	0	0	0	45	0	45	10.128	22	119.117	45.172	0	0.233	0.629	0	0.222	0.165	15.23	16.512	14.316	15.228	0.544	0.461797	14-12-2019	B6-15	15°C	up	15
23	Track_23	18	1	3	0	0	0	20	0	20	9.782	23	34.729	81.185	0	0.475	0.784	0.193	0.491	0.175	16.444	20.813	8.397	17.977	3.905	-0.0191747	14-12-2019	B6-15	15°C	down	15
24	Track_24	46	0	0	0	0	0	45	0	45	35.771	24	92.825	96.256	0	0.799	1.151	0	0.886	0.302	12.53	13.627	9.471	12.544	0.647	0.009397	14-12-2019	B6-15	15°C	up	15
25	Track_25	46	0	0	0	0	0	45	0	45	29.046	25	83.855	35.878	0	0.679	0.964	0	0.69	0.205	18.35	19.499	17.298	18.323	0.472	-0.0699076	14-12-2019	B6-15	15°C	down	15
26	Track_26	43	1	3	0	0	0	45	0	45	13.907	26	84.644	40.129	0	0.382	0.848	0	0.281	0.249	19.368	20.485	17.042	19.632	0.853	0.0466934	14-12-2019	B6-15	15°C	up	15
27	Track_27	4	0	0	0	0	0	3	0	3	1.248	27	34.201	58.63	0	0.417	0.5	0.359	0.39	0.074	14.094	15.191	12.586	14.413	0.947	0.0849307	14-12-2019	B6-15	15°C	up	15
28	Track_28	44	1	2	0	0	0	45	0	45	19.307	28	52.243	49.761	0	0.431	0.673	0	0.486	0.192	20.083	21.926	18.388	20.373	1.061	0.1355	14-12-2019	B6-15	15°C	up	15
29	Track_29	2	0	0	0	0	0	1	0	1	0.024	29	145.55	69.619	0	0.024	0.024	0.024	0.024	NA	8.42	8.459	8.382	8.459	0.038	0.169594	14-12-2019	B6-15	15°C	up	15
30	Track_30	44	1	2	0	0	0	45	0	45	6.005	30	110.8	94.469	0	0.63	0.804	0	0.68	0.184	17.242	19.641	13.853	16.886	1.258	0.021	14-12-2019	B6-15	15°C	up	15
31	Track_31	46	0	0	0	0	0	45	0	45	9.526	31	142.421	73.185	0	0.271	0.692	0	0.228	0.167	18.618	19.749	16.426	18.772	0.704	0.131337	14-12-2019	B6-15	15°C	up	15
32	Track_32	46	0	0	0	0	0	45	0	45	6.797	32	47.031	83.693	0	0.27	0.701	0	0.272	0.16	17.292	18.534	15.389	17.474	0.683	0.0115073	14-12-2019	B6-15	15°C	up	15
33	Track_33	46	0	0	0	0	0	45	0	45	17.946	33	64.815	72.404	0	0.428	0.547	0	0.442	0.113	17.457	19.814	15.327	17.483	1.065	0.106844	14-12-2019	B6-15	15°C	up	15
34	Track_34	44	1	2	0	0	0	45	0	45	2.573	34	56.048	57.457	0	0.44	0.814	0	0.449	0.208	17.364	20.867	13.28	19.111	2.586	0.15263	14-12-2019	B6-15	15°C	up	15
35	Track_35	31	1	2	0	0	0	32	0	32	5.334	35	142.118	66.703	0	0.251	0.753	0.064	0.197	0.182	18.471	21.743	9.893	19.651	3.218	0.0359597	14-12-2019	B6-15	15°C	up	15
36	Track_36	41	2	3	0	0	0	45	0	45	12.47	36	75.68	32.466	0	0.385	0.654	0	0.432	0.167	18.104	19.341	16.217	18.219	0.7	0.0248284	14-12-2019	B6-15	15°C	up	15
37	Track_37	46	0	0	0	0	0	45	0	45	6.488	37	59.208	77	0	0.147	0.298	0	0.145	0.067	17.83	18.934	16.908	17.877	0.454	-0.0299719	14-12-2019	B6-15	15°C	down	15
38	Track_38	44	2	1	0	0	0	45	0	45	13.259	38	143.443	84.899	0	0.319	0.736	0	0.326	0.192	17.639	19.814	15.583	17.733	1.172	0.0742334	14-12-2019	B6-15	15°C	up	15
39	Track_39	46	0	0	0	0	0	45	0	45	31.643	39	81.975	44.755	0	0.777	1.067	0	0.921	0.292	18.188	20.717	13.502	18.94	1.957	0.00553337	14-12-2019	B6-15	15°C	up	15
40	Track_40	20	0	0	0	0	0	19	0	19	12.128	40	125.221	82.984	0	0.699	1.559	0.579	0.658	0.213	14.035	15.603	12.031	14.216	0.926	0.00848165	14-12-2019	B6-15	15°C	up	15
41	Track_41	17	0	0	0	0	0	16	0	16	0.914	41	33.766	68.073	0	0.106	0.274	0.015	0.092	0.076	9.789	11.817	8.741	9.412	0.899	0.270905	14-12-2019	B6-15	15°C	up	15
42	Track_42	46	0	0	0	0	0	45	0	45	13.01	42	52.785	45.098	0	0.333	0.465	0	0.328	0.089	18.804	20.239	16.956	18.884	0.768	-0.0808603	14-12-2019	B6-15	15°C	down	15
43	Track_43	44	1	2	0	0	0	45	0	45	15.586	43	113.218	71.764	0	0.451	0.669	0	0.488	0.141	16.383	19.641	15.367	16.231	0.938	0.255787	14-12-2019	B6-15	15°C	up	15
44	Track_44	46	0	0	0	0	0	45	0	45	12.044	44	92.871	81.65	0	0.363	0.56	0	0.383	0.111	15.66	16.761	14.261	15.65	0.543	0.173524	14-12-2019	B6-15	15°C	up	15
45	Track_45	46	0	0	0	0	0	45	0	45	16.458	45	109.653	34.921	0	0.382	0.621	0	0.399	0.139	17.35	18.26	15.743	17.465	0.555	-0.168209	14-12-2019	B6-15	15°C	down	15
46	Track_46	46	0	0	0	0	0	45	0	45	3.952	46	42.226	76.535	0	0.104	0.197	0	0.106	0.043	16.702	17.484	15.525	16.901	0.507	-0.186101	14-12-2019	B6-15	15°C	down	15
47	Track_47	46	0	0	0	0	0	45	0	45	57.225	47	79.015	30.876	0	1.275	1.567	0	1.325	0.303	14.898	17.885	12.404	14.444	1.2	-0.100768	14-12-2019	B6-15	15°C	down	15
48	Track_48	44	1	2	0	0	0	45	0	45	16.279	48	99.301	45.819	0	0.527	0.979	0	0.369	0.342	16.98	18.679	14.947	17.202	0.94	-0.0170821	14-12-2019	B6-15	15°C	down	15
49	Track_49	46	0	0	0	0	0	45	0	45	19.846	49	98.672	87.223	0	0.456	0.673	0	0.534	0.188	17.584	18.936	16.143	17.605	0.56	-0.0796669	14-12-2019	B6-15	15°C	down	15
50	Track_50	44	1	2	0	0	0	45	0	45	15.394	50	94.164	67.119	0	0.452	0.701	0	0.463	0.155	18.82	19.931	14.944	19.032	0.901	-0.0626345	14-12-2019	B6-15	15°C	down	15
51	Track_51	11	1	1	0	0	0	11	0	11	1.565	51	93.702	100.431	0	0.769	1.107	0.485	0.758	0.225	12.311	16.372	9.362	11.175	2.46	-0.00602572	14-12-2019	B6-15	15°C	down	15
52	Track_52	46	0	0	0	0	0	45	0	45	14.656	52	88.873	88.925	0	0.331	0.629	0	0.306	0.163	15.913	16.53	14.261	16.097	0.531	-0.186876	14-12-2019	B6-15	15°C	down	15
53	Track_53	45	1	1	0	0	0	45	0	45	41.815	53	90.333	42.74	0	0.932	1.118	0	0.981	0.226	17.668	19.26	16.448	17.564	0.646	-0.00245372	14-12-2019	B6-15	15°C	down	15
54	Track_54	46	0	0	0	0	0	45	0	45	10.499	54	54.033	83.994	0	0.273	0.512	0	0.277	0.113	18.863	19.387	17.323	18.917	0.339	-0.0457244	14-12-2019	B6-15	15°C	down	15
55	Track_55	43	2	2	0	0	0	45	0	45	3.751	55	101.714	44.33	0	0.391	1.033	0	0.302	0.281	11.617	18.999	8.796	9.673	3.825	0.144933	14-12-2019	B6-15	15°C	up	15
56	Track_56	46	0	0	0	0	0	45	0	45	2.586	56	64.023	91.568	0	0.122	0.297	0	0.117	0.072	18.055	18.995	16.856	18.111	0.533	0.0167756	14-12-2019	B6-15	15°C	up	15
57	Track_57	43	1	3	0	0	0	45	0	45	7.949	57	65.393	64.958	0	0.308	0.495	0	0.34	0.115	17.977	19.565	15.156	18.494	1.249	0.0647882	14-12-2019	B6-15	15°C	up	15
58	Track_58	46	0	0	0	0	0	45	0	45	15.82	58	114.458	65.251	0	0.355	0.571	0	0.378	0.121	14.448	15.741	13.357	14.397	0.653	0.1297	14-12-2019	B6-15	15°C	up	15
59	Track_59	46	0	0	0	0	0	45	0	45	15.769	59	114.562	33.574	0	0.469	0.817	0	0.503	0.215	16.309	17.499	14.396	16.277	0.612	0.143512	14-12-2019	B6-15	15°C	up	15
60	Track_60	46	0	0	0	0	0	45	0	45	2.246	60	118.021	43.393	0	0.278	0.606	0	0.265	0.164	15.016	15.913	13.978	15.01	0.459	-0.234972	14-12-2019	B6-15	15°C	down	15
61	Track_61	46	0	0	0	0	0	45	0	45	11.44	61	51.896	61.906	0	0.301	0.764	0	0.264	0.164	16.941	18.578	15.895	16.926	0.741	-0.00174493	14-12-2019	B6-15	15°C	down	15
62	Track_62	7	1	2	0	0	0	8	0	8	1.547	62	145.479	66.75	0	0.256	0.486	0.137	0.283	0.128	12.32	14.811	8.666	12.017	1.926	0.0213842	14-12-2019	B6-15	15°C	up	15
63	Track_63	2	0	0	0	0	0	1	0	1	0.314	63	28.656	72.639	0	0.314	0.314	0.314	0.314	NA	8.809	9.071	8.548	9.071	0.262	-0.132024	14-12-2019	B6-15	15°C	down	15
64	Track_64	42	1	4	0	0	0	45	0	45	6.935	64	59.041	64.916	0	0.247	0.452	0	0.241	0.098	17.562	20.063	14.804	17.606	1.135	0.299	14-12-2019	B6-15	15°C	up	15
65	Track_65	45	1	1	0	0	0	45	0	45	35.693	65	90.229	75.145	0	0.802	1.045	0	0.897	0.23	12.182	13.729	9.713	12.331	0.944	0.175167	14-12-2019	B6-15	15°C	up	15
66	Track_66	32	0	0	0	0	0	31	0	31	17.737	66	52.488	91.764	0	0.607	0.746	0.467	0.6	0.083	11.719	13.648	8.534	12.063	1.479	-0.132646	14-12-2019	B6-15	15°C	down	15
67	Track_67	37	2	6	0	0	0	45	0	45	16.004	67	88.466	46.265	0	0.52	0.827	0	0.612	0.264	16.349	19.149	8.791	17.829	3.071	0.532319	14-12-2019	B6-15	15°C	up	15
68	Track_68	44	0	0	0	0	0	43	2	45	24.135	68	105.1	93.714	0	0.573	0.816	0	0.591	0.174	17.962	19.454	16.073	18.355	0.973	-0.0976625	14-12-2019	B6-15	15°C	down	15
69	Track_69	31	2	7	0	0	0	43	2	45	4.728	69	28.874	60.924	0	0.2	0.771	0	0.202	0.178	12.895	16.677	8.717	13.34	2.419	-0.071868	14-12-2019	B6-15	15°C	down	15
70	Track_70	36	2	7	0	0	0	43	2	45	15.151	70	152.287	53.66	0	0.391	1.212	0	0.202	0.417	14.006	19.948	9.48	13.473	2.943	0.0941407	14-12-2019	B6-15	15°C	up	15
71	Track_71	4	0	0	0	0	0	3	3	6	0.825	71	144.128	51.261	0	0.29	0.33	0.262	0.278	0.036	20.693	21.214	20.29	20.677	0.333	0.446459	14-12-2019	B6-15	15°C	up	15
72	Track_72	11	0	0	0	0	0	10	2	12	5.217	72	45.488	39.67	0	0.526	0.651	0.3	0.56	0.104	19.979	20.72	18.158	20.392	0.741	-0.0039	14-12-2019	B6-15	15°C	down	15
73	Track_73	27	6	5	0	0	0	39	6	45	7.764	73	110.155	61.88	0	0.499	0.784	0	0.536	0.226	9.153	10.822	8.455	8.905	0.561	0.243	14-12-2019	B6-15	15°C	up	15
74	Track_74	15	0	0	0	0	0	14	13	27	8.294	74	135.307	44.171	0	0.597	0.807	0.445	0.579	0.094	19.498	20.846	17.27	19.681	0.961	0.28491	14-12-2019	B6-15	15°C	up	15
75	Track_75	31	0	0	0	0	0	30	15	45	17.524	75	88.807	77.452	0	0.607	0.876	0	0.668	0.189	17.953	18.711	16.642	18.037	0.563	-0.245436	14-12-2019	B6-15	15°C	down	15
76	Track_76	22	1	6	0	0	0	27	18	45	2.218	76	30.56	60.964	0	0.247	0.593	0	0.227	0.159	9.744	11.399	8.471	9.746	0.882	-0.139601	14-12-2019	B6-15	15°C	down	15
77	Track_77	2	0	0	0	0	0	1	19	20	0.149	77	148.446	63.704	0	0.149	0.149	0.149	0.149	NA	20.309	21.345	19.273	21.345	1.036	0.096925	14-12-2019	B6-15	15°C	up	15
78	Track_78	27	0	0	0	0	0	26	19	45	10.066	78	137.699	85.935	0	0.39	0.576	0	0.422	0.146	14.778	16.474	12.693	15.3	1.186	0.132	14-12-2019	B6-15	15°C	up	15
79	Track_79	27	0	0	0	0	0	26	19	45	20.024	79	63.887	45.526	0	0.774	0.966	0	0.85	0.242	18.956	19.986	16.851	19.183	0.741	0.0226502	14-12-2019	B6-15	15°C	up	15
80	Track_80	26	0	0	0	0	0	25	20	45	2.737	80	55.393	31.612	0	0.129	0.259	0	0.134	0.072	14.069	15.537	11.663	14.696	1.246	0.157158	14-12-2019	B6-15	15°C	up	15
81	Track_81	19	1	2	0	0	0	20	25	45	6.733	81	120.961	30.077	0	0.341	0.525	0	0.391	0.173	9.752	12.062	8.474	9.272	1.218	0.108575	14-12-2019	B6-15	15°C	up	15
82	Track_82	3	0	0	0	0	0	2	29	31	0.606	82	146.208	98.28	0	0.306	0.375	0.237	0.375	0.098	8.692	8.763	8.632	8.68	0.054	-0.233427	14-12-2019	B6-15	15°C	down	15
83	Track_83	11	1	1	0	0	0	11	29	40	3.978	83	131.177	100.539	0	0.433	1.104	0.261	0.367	0.242	12.789	16.475	9.741	12.778	2.014	-0.0745	14-12-2019	B6-15	15°C	down	15
84	Track_84	16	0	0	0	0	0	15	30	45	1.766	84	39.206	95.388	0	0.21	0.454	0	0.214	0.127	20.136	20.989	19.063	20.245	0.457	0.315974	14-12-2019	B6-15	15°C	up	15
85	Track_85	4	0	0	0	0	0	3	31	34	0.27	85	148.426	62.713	0	0.355	0.534	0.134	0.396	0.203	20.268	23.996	17.823	21.376	2.589	-0.124243	14-12-2019	B6-15	15°C	down	15
86	Track_86	10	1	3	0	0	0	12	33	45	0.878	86	36.645	54.687	0	0.066	0.106	0	0.087	0.041	16.247	16.518	16.025	16.242	0.155	-0.0559	14-12-2019	B6-15	15°C	down	15
87	Track_87	13	0	0	0	0	0	12	33	45	2.951	87	80.067	100.34	0	0.248	0.491	0	0.246	0.147	16.028	16.979	14.15	16.013	0.78	-0.0782029	14-12-2019	B6-15	15°C	down	15
88	Track_88	6	1	1	0	0	0	6	35	41	2.646	88	143.491	40.436	0	0.447	0.491	0.414	0.433	0.032	19.754	20.116	19.247	19.997	0.359	-0.19117	14-12-2019	B6-15	15°C	down	15
89	Track_89	9	0	0	0	0	0	8	37	45	5.38	89	76.43	33.068	0	0.676	1.018	0	0.863	0.423	14.74	15.945	9.753	15.669	1.91	-0.141214	14-12-2019	B6-15	15°C	down	15
90	Track_90	6	0	0	0	0	0	5	40	45	0.593	90	94.352	101.332	0	0.119	0.262	0	0.146	0.117	15.692	16.078	14.775	16.078	0.482	0.683217	14-12-2019	B6-15	15°C	up	15
1	Track_1	44	0	0	0	0	0	43	0	43	8.792	1	89.009	77.265	0	0.247	0.668	0	0.195	0.188	19.425	20.441	16.04	19.493	0.727	-0.0598443	14-12-2019	B6-15	15°C	down	15
2	Track_2	44	0	0	0	0	0	43	0	43	5.948	2	78.496	98.7	0	0.326	0.606	0	0.313	0.15	14.422	18.178	8.582	14.533	2.437	0.0197132	14-12-2019	B6-15	15°C	up	15
3	Track_3	43	1	1	0	0	0	43	0	43	12.277	3	79.264	32.483	0	0.402	0.843	0	0.4	0.164	17.461	21.521	13.831	17.697	1.524	-0.0547142	14-12-2019	B6-15	15°C	down	15
4	Track_4	44	0	0	0	0	0	43	0	43	20.501	4	118.286	76.662	0	0.505	0.927	0	0.501	0.136	17.226	18.412	13.893	17.471	1.058	-0.0584404	14-12-2019	B6-15	15°C	down	15
5	Track_5	15	0	0	0	0	0	14	0	14	6.083	5	38.022	36.263	0	0.455	0.632	0.25	0.47	0.082	16.886	17.545	15.8	16.949	0.484	-0.00785377	14-12-2019	B6-15	15°C	down	15
6	Track_6	44	0	0	0	0	0	43	0	43	18.186	6	65.996	37.072	0	0.44	0.826	0	0.457	0.111	15.198	16.713	13.846	15.123	0.715	0.432796	14-12-2019	B6-15	15°C	up	15
7	Track_7	44	0	0	0	0	0	43	0	43	7.575	7	125.404	96.608	0	0.197	0.651	0	0.193	0.108	15.69	17.076	14.107	15.85	0.751	0.082258	14-12-2019	B6-15	15°C	up	15
8	Track_8	44	0	0	0	0	0	43	0	43	7.217	8	94.849	45.725	0	0.401	0.689	0	0.405	0.168	15.936	17.852	12.285	16.014	1.316	0.0413381	14-12-2019	B6-15	15°C	up	15
9	Track_9	33	2	8	0	0	0	43	0	43	6.907	9	53.824	100.025	0	0.29	0.582	0	0.307	0.122	15.356	16.57	13.538	15.662	0.949	-0.00553326	14-12-2019	B6-15	15°C	down	15
10	Track_10	44	0	0	0	0	0	43	0	43	15.628	10	110.572	89.325	0	0.373	0.756	0	0.375	0.123	14.427	17.63	12.825	14.172	1.04	-0.0770317	14-12-2019	B6-15	15°C	down	15
11	Track_11	32	3	9	0	0	0	43	0	43	7.344	11	93.284	102.377	0	0.339	0.75	0	0.358	0.18	16.325	19.538	8.691	16.691	2.161	0.000652008	14-12-2019	B6-15	15°C	up	15
12	Track_12	16	0	0	0	0	0	15	0	15	4.228	12	128.463	75.396	0	0.319	0.599	0.25	0.285	0.09	15.326	16.635	11.621	15.608	1.131	0.00182299	14-12-2019	B6-15	15°C	up	15
13	Track_13	7	0	0	0	0	0	6	0	6	2.888	13	39.442	93.74	0	0.482	0.587	0.202	0.539	0.142	19.114	19.776	18.555	19.161	0.381	-0.0319882	14-12-2019	B6-15	15°C	down	15
14	Track_14	44	0	0	0	0	0	43	0	43	15.54	14	88.638	75.522	0	0.377	0.694	0	0.368	0.095	15.474	22.351	12.961	15.438	1.515	-0.04225	14-12-2019	B6-15	15°C	down	15
15	Track_15	44	0	0	0	0	0	43	0	43	11.1	15	49.112	60.049	0	0.295	0.597	0	0.318	0.122	17.925	19.297	16.495	18.061	0.635	-0.0208092	14-12-2019	B6-15	15°C	down	15
16	Track_16	44	0	0	0	0	0	43	0	43	5.578	16	95.383	99.048	0	0.17	0.431	0	0.169	0.103	17.257	18.688	16.39	17.203	0.55	0.157505	14-12-2019	B6-15	15°C	up	15
17	Track_17	44	0	0	0	0	0	43	0	43	13.361	17	67.441	62.788	0	0.328	0.605	0	0.335	0.086	18.845	20.496	15.727	18.869	1.197	-0.0218562	14-12-2019	B6-15	15°C	down	15
18	Track_18	43	1	1	0	0	0	43	0	43	20.626	18	108.765	101.055	0	0.55	0.817	0	0.567	0.142	15.144	16.985	12.232	15.153	0.93	-0.0781616	14-12-2019	B6-15	15°C	down	15
19	Track_19	44	0	0	0	0	0	43	0	43	28.77	19	110.297	62.897	0	0.681	1.108	0	0.694	0.139	16.288	17.607	14.792	16.387	0.744	0.0410434	14-12-2019	B6-15	15°C	up	15
20	Track_20	43	1	1	0	0	0	43	0	43	14.562	20	131.954	36.818	0	0.412	2.094	0	0.369	0.327	17.232	19.957	10.81	17.384	1.451	-0.0504439	14-12-2019	B6-15	15°C	down	15
21	Track_21	39	1	5	0	0	0	43	0	43	6.163	21	67.214	78.703	0	0.316	0.684	0	0.328	0.155	17.02	18.56	14.385	17.012	1.021	-0.0849369	14-12-2019	B6-15	15°C	down	15
22	Track_22	28	0	0	0	0	0	27	0	27	15.743	22	124.549	42.54	0	0.616	0.97	0.348	0.628	0.114	16.551	18.482	9.991	16.676	1.683	-0.0697444	14-12-2019	B6-15	15°C	down	15
23	Track_23	42	1	2	0	0	0	43	0	43	9.118	23	127.955	79.546	0	0.368	0.729	0	0.403	0.155	13.919	16.191	8.009	14.464	2.205	-0.193081	14-12-2019	B6-15	15°C	down	15
24	Track_24	32	0	0	0	0	0	31	0	31	28.007	24	86.397	61.854	0	0.91	1.238	0.591	0.899	0.107	14.473	15.713	12.066	14.616	0.792	-0.01309	14-12-2019	B6-15	15°C	down	15
25	Track_25	44	0	0	0	0	0	43	0	43	11.144	25	133.209	44.281	0	0.275	0.804	0	0.241	0.198	15.572	17.409	14.558	15.571	0.606	0.785345	14-12-2019	B6-15	15°C	up	15
26	Track_26	44	0	0	0	0	0	43	0	43	1.381	26	53.331	69.834	0	0.105	0.421	0	0.096	0.071	16.657	18.98	15.591	16.324	0.893	-0.0187699	14-12-2019	B6-15	15°C	down	15
27	Track_27	44	0	0	0	0	0	43	0	43	8.946	27	66.185	80.216	0	0.256	0.657	0	0.235	0.119	17.447	25.318	13.59	17.348	2.359	0.0320345	14-12-2019	B6-15	15°C	up	15
28	Track_28	44	0	0	0	0	0	43	0	43	17.846	28	86.153	86.693	0	0.425	0.77	0	0.424	0.098	18.518	19.295	17.503	18.566	0.474	-0.0791154	14-12-2019	B6-15	15°C	down	15
29	Track_29	44	0	0	0	0	0	43	0	43	3.412	29	43.828	76.404	0	0.104	0.454	0	0.087	0.076	17.01	17.87	15.736	17.064	0.485	-0.0439069	14-12-2019	B6-15	15°C	down	15
30	Track_30	44	0	0	0	0	0	43	0	43	3.104	30	111.268	43.008	0	0.313	0.856	0	0.332	0.155	14.667	16.231	12.138	14.802	0.789	0.0760209	14-12-2019	B6-15	15°C	up	15
31	Track_31	44	0	0	0	0	0	43	0	43	17.001	31	69.925	42.564	0	0.423	0.88	0	0.407	0.133	18.573	20.719	16.928	18.488	0.884	-0.0158557	14-12-2019	B6-15	15°C	down	15
32	Track_32	44	0	0	0	0	0	43	0	43	24.778	32	94.576	74.741	0	0.597	0.983	0	0.606	0.119	16.396	18.191	14.329	16.249	0.771	0.00989218	14-12-2019	B6-15	15°C	up	15
33	Track_33	7	0	0	0	0	0	6	0	6	4.607	33	128.973	97.591	0	0.769	0.812	0.668	0.795	0.053	9.216	10.685	8.065	8.711	0.967	-0.00234764	14-12-2019	B6-15	15°C	down	15
34	Track_34	44	0	0	0	0	0	43	0	43	3.296	34	108.966	53.343	0	0.117	0.485	0	0.096	0.091	14.594	16.662	12.014	14.595	1.114	-0.667	14-12-2019	B6-15	15°C	down	15
35	Track_35	44	0	0	0	0	0	43	0	43	4.157	35	63.532	61.243	0	0.219	0.777	0	0.171	0.17	16.192	18.327	14.234	16.217	0.944	-0.0711123	14-12-2019	B6-15	15°C	down	15
36	Track_36	44	0	0	0	0	0	43	0	43	13.346	36	70.322	84.584	0	0.339	0.666	0	0.343	0.082	16.269	19.125	13.312	15.797	1.797	-0.051791	14-12-2019	B6-15	15°C	down	15
37	Track_37	30	0	0	0	0	0	29	0	29	20.647	37	133.616	72.755	0	0.72	1.872	0.446	0.646	0.278	12.63	15.572	8.894	12.269	1.525	-0.0519688	14-12-2019	B6-15	15°C	down	15
38	Track_38	44	0	0	0	0	0	43	0	43	8.061	38	79.669	65.797	0	0.255	0.499	0	0.254	0.117	15.445	17.271	13.623	15.295	1.083	-0.0751279	14-12-2019	B6-15	15°C	down	15
39	Track_39	44	0	0	0	0	0	43	0	43	5.92	39	126.229	65.793	0	0.161	0.547	0	0.151	0.088	13.286	15.025	10.549	13.555	1.107	-0.0659103	14-12-2019	B6-15	15°C	down	15
40	Track_40	44	0	0	0	0	0	43	0	43	13.045	40	61.895	90.428	0	0.35	0.758	0	0.334	0.149	15.782	18.1	12.116	16.081	1.152	-0.0886316	14-12-2019	B6-15	15°C	down	15
41	Track_41	34	1	1	0	0	0	34	0	34	17.602	41	134.434	97.997	0	0.538	1.848	0.197	0.442	0.299	10.4	13.348	7.739	10.668	1.551	-0.0938582	14-12-2019	B6-15	15°C	down	15
42	Track_42	44	0	0	0	0	0	43	0	43	11.776	42	63.633	54.592	0	0.34	0.597	0	0.34	0.088	19.359	20.487	17.856	19.293	0.583	0.0630026	14-12-2019	B6-15	15°C	up	15
43	Track_43	44	0	0	0	0	0	43	0	43	2.299	43	82.792	84.782	0	0.15	0.418	0	0.131	0.086	17.546	18.746	16.881	17.495	0.396	-0.0114941	14-12-2019	B6-15	15°C	down	15
44	Track_44	8	0	0	0	0	0	7	0	7	1.169	44	133.667	103.593	0	0.197	0.631	0	0.203	0.233	16.541	21.017	11.988	17.018	2.654	-0.0264261	14-12-2019	B6-15	15°C	down	15
45	Track_45	44	0	0	0	0	0	43	0	43	26.069	45	95.503	47.65	0	0.618	0.973	0	0.627	0.119	17.146	19.097	15.383	16.998	0.972	0.110869	14-12-2019	B6-15	15°C	up	15
46	Track_46	44	0	0	0	0	0	43	0	43	0.452	46	82.497	67.252	0	0.14	0.467	0	0.136	0.084	17.475	18.057	15.323	17.639	0.517	-0.0529128	14-12-2019	B6-15	15°C	down	15
47	Track_47	27	0	0	0	0	0	26	0	26	7.334	47	41.321	94.829	0	0.299	0.67	0.172	0.29	0.089	18.54	19.515	17.617	18.559	0.51	0.00705292	14-12-2019	B6-15	15°C	up	15
48	Track_48	43	1	1	0	0	0	43	0	43	17.447	48	131.073	38.659	0	0.517	3.062	0	0.483	0.425	16.427	18.539	8.494	16.696	1.971	-0.100941	14-12-2019	B6-15	15°C	down	15
49	Track_49	41	0	0	0	0	0	40	0	40	6.427	49	41.103	85.286	0	0.295	0.628	0.1	0.306	0.116	16.609	18.853	14.032	16.676	0.904	-0.100155	14-12-2019	B6-15	15°C	down	15
50	Track_50	44	0	0	0	0	0	43	0	43	20.36	50	82.558	96.466	0	0.483	0.836	0	0.473	0.123	17.239	18.721	15.867	17.171	0.675	0.0260145	14-12-2019	B6-15	15°C	up	15
51	Track_51	12	0	0	0	0	0	11	0	11	4.687	51	39.729	54.723	0	0.429	0.476	0.401	0.428	0.024	20.052	21.055	18.469	20.362	0.745	-0.024776	14-12-2019	B6-15	15°C	down	15
52	Track_52	44	0	0	0	0	0	43	0	43	0.377	52	62.765	78.429	0	0.063	0.388	0	0.042	0.078	16.849	19.356	15.649	16.229	1.102	0.242486	14-12-2019	B6-15	15°C	up	15
53	Track_53	44	0	0	0	0	0	43	0	43	17.901	53	77.652	54.304	0	0.43	0.733	0	0.422	0.098	17.653	19.983	16.076	17.253	1.173	-0.0104567	14-12-2019	B6-15	15°C	down	15
54	Track_54	44	0	0	0	0	0	43	0	43	16.494	54	133.298	50.174	0	0.392	1.001	0	0.372	0.135	15.426	16.735	11.947	15.702	1.017	-0.0132877	14-12-2019	B6-15	15°C	down	15
55	Track_55	39	0	0	0	0	0	38	0	38	11.951	55	43.873	60.628	0	0.421	0.701	0.194	0.43	0.114	15.476	18.874	11.016	15.273	1.692	-0.171591	14-12-2019	B6-15	15°C	down	15
56	Track_56	25	0	0	0	0	0	24	0	24	13.421	56	111.935	32.944	0	0.585	0.952	0.385	0.566	0.119	17.466	20.398	15.459	17.221	0.998	0.138629	14-12-2019	B6-15	15°C	up	15
57	Track_57	34	4	4	0	0	0	42	1	43	12.018	57	113.147	77.088	0	0.435	0.962	0	0.446	0.17	8.592	9.554	7.729	8.593	0.488	-0.129372	14-12-2019	B6-15	15°C	down	15
58	Track_58	44	0	0	0	0	0	43	0	43	3.835	58	88.092	79.643	0	0.198	0.434	0	0.193	0.099	16.353	17.164	15.456	16.393	0.426	0.260364	14-12-2019	B6-15	15°C	up	15
59	Track_59	44	0	0	0	0	0	43	0	43	13.084	59	84.342	82.706	0	0.386	0.551	0	0.456	0.141	17.562	19.014	16.13	17.6	0.68	0.0429685	14-12-2019	B6-15	15°C	up	15
60	Track_60	42	2	1	0	0	0	43	0	43	20.363	60	74.398	42.526	0	0.471	0.656	0	0.487	0.101	9.622	11.219	7.7	9.968	1.107	0.0119856	14-12-2019	B6-15	15°C	up	15
61	Track_61	40	0	0	0	0	0	39	4	43	10.574	61	42.518	98.651	0	0.39	0.771	0	0.377	0.145	9.554	11.401	8.08	9.4	0.865	-0.0307131	14-12-2019	B6-15	15°C	down	15
62	Track_62	23	0	0	0	0	0	22	5	27	17.657	62	137.22	89.049	0	0.818	1.07	0.701	0.789	0.095	12.813	16.33	9.863	12.711	1.979	-0.0903093	14-12-2019	B6-15	15°C	down	15
63	Track_63	30	0	0	0	0	0	29	14	43	5.884	63	68.235	100.944	0	0.224	0.37	0	0.238	0.065	15.418	16.663	13.454	15.776	0.902	-0.640142	14-12-2019	B6-15	15°C	down	15
64	Track_64	25	0	0	0	0	0	24	14	38	6.862	64	135.764	35.069	0	0.323	0.584	0.127	0.34	0.115	17.159	18.544	13.197	17.795	1.277	-0.0653524	14-12-2019	B6-15	15°C	down	15
65	Track_65	29	0	0	0	0	0	28	15	43	5.042	65	134.194	74.078	0	0.192	0.379	0	0.19	0.069	14.532	15.63	11.05	14.695	0.811	-0.124341	14-12-2019	B6-15	15°C	down	15
66	Track_66	18	1	8	0	0	0	25	18	43	5.207	66	53.925	100.828	0	0.229	0.311	0	0.25	0.083	14.399	15.717	13.44	14.5	0.65	-0.065602	14-12-2019	B6-15	15°C	down	15
67	Track_67	15	0	0	0	0	0	14	29	43	4.138	67	132.398	79.493	0	0.302	0.538	0	0.306	0.154	14.67	15.897	9.454	15.515	1.603	-0.0996149	14-12-2019	B6-15	15°C	down	15
68	Track_68	10	0	0	0	0	0	9	34	43	7.719	68	94.626	81.1	0	0.858	1.105	0	0.933	0.328	14.651	15.482	13.801	14.915	0.618	-0.328468	14-12-2019	B6-15	15°C	down	15
1	Track_1	45	0	0	0	0	0	44	0	44	1.978	1	135.429	71.211	0	0.088	0.205	0	0.076	0.051	14.717	15.733	13.999	14.683	0.383	0.0691377	14-12-2019	B6-15	15°C	up	15
2	Track_2	34	3	7	0	0	0	44	0	44	10.114	2	65.014	93.931	0	0.305	0.598	0	0.306	0.137	13.947	21.281	9.399	13.947	2.667	-0.0157639	14-12-2019	B6-15	15°C	down	15
3	Track_3	34	1	2	0	0	0	35	0	35	16.728	3	122.005	43.087	0	0.512	0.654	0.214	0.539	0.108	15.432	17.68	10.128	15.579	1.436	-0.0557726	14-12-2019	B6-15	15°C	down	15
4	Track_4	45	0	0	0	0	0	44	0	44	11.369	4	93.673	81	0	0.318	0.45	0	0.315	0.08	15.271	16.484	13.848	15.195	0.649	-0.120407	14-12-2019	B6-15	15°C	down	15
5	Track_5	45	0	0	0	0	0	44	0	44	13.099	5	98.869	41.367	0	0.381	0.504	0	0.427	0.108	13.947	15.51	12.513	13.861	0.789	0.0682686	14-12-2019	B6-15	15°C	up	15
6	Track_6	45	0	0	0	0	0	44	0	44	19.841	6	86.145	59.018	0	0.457	0.611	0	0.462	0.095	17.033	18.35	15.509	17.103	0.695	-0.0732667	14-12-2019	B6-15	15°C	down	15
7	Track_7	7	0	0	0	0	0	6	0	6	2.008	7	59.674	41.765	0	0.336	0.389	0.301	0.344	0.031	9.299	10.094	8.497	9.167	0.491	-0.0498656	14-12-2019	B6-15	15°C	down	15
8	Track_8	21	0	0	0	0	0	20	0	20	3.131	8	141.34	42.908	0	0.235	0.587	0.008	0.212	0.146	14.372	18.541	11.538	13.961	1.578	0.0309286	14-12-2019	B6-15	15°C	up	15
9	Track_9	5	1	1	0	0	0	5	0	5	0.756	9	128.919	74.784	0	0.199	0.332	0.077	0.195	0.105	11.86	14.994	8.784	11.369	2.096	-0.0676571	14-12-2019	B6-15	15°C	down	15
10	Track_10	12	0	0	0	0	0	11	0	11	11.308	10	95.973	98.695	0	1.03	1.135	0.937	1.033	0.054	13.494	15.261	11.092	13.784	1.228	0.0445814	14-12-2019	B6-15	15°C	up	15
11	Track_11	38	2	1	0	0	0	39	0	39	10.686	11	54.555	94.446	0	0.399	0.58	0.173	0.397	0.101	8.918	9.472	8.335	8.947	0.309	1.02491	14-12-2019	B6-15	15°C	up	15
12	Track_12	2	0	0	0	0	0	1	0	1	0.713	12	132.419	31.269	0	0.713	0.713	0.713	0.713	NA	16.347	20.229	12.465	20.229	3.882	-0.0492169	14-12-2019	B6-15	15°C	down	15
13	Track_13	45	0	0	0	0	0	44	0	44	7.893	13	134.851	74.567	0	0.221	0.412	0	0.22	0.082	16.893	19.048	13.929	17.084	1.204	-0.544	14-12-2019	B6-15	15°C	down	15
14	Track_14	39	0	0	0	0	0	38	0	38	15.904	14	136.808	57.887	0	0.446	1.544	0.192	0.428	0.21	16.728	20.497	14.396	16.956	1.469	-0.00377207	14-12-2019	B6-15	15°C	down	15
15	Track_15	45	0	0	0	0	0	44	0	44	2.468	15	45.509	78.094	0	0.062	0.11	0	0.06	0.024	16.23	16.763	15.71	16.176	0.27	-0.109478	14-12-2019	B6-15	15°C	down	15
16	Track_16	8	0	0	0	0	0	7	0	7	1	16	37.11	63.86	0	0.263	0.57	0	0.2	0.178	17.082	19.323	12.087	18.543	2.311	0.032249	14-12-2019	B6-15	15°C	up	15
17	Track_17	45	0	0	0	0	0	44	0	44	10.602	17	93.627	61.659	0	0.28	0.506	0	0.385	0.16	15.191	16.559	13.296	15.416	0.911	0.135333	14-12-2019	B6-15	15°C	up	15
18	Track_18	43	0	0	0	0	0	42	0	42	18.21	18	120.126	74.422	0	0.447	0.573	0.207	0.45	0.076	15.029	16.396	10.372	15.183	0.919	-0.0742372	14-12-2019	B6-15	15°C	down	15
19	Track_19	45	0	0	0	0	0	44	0	44	0.091	19	61.61	77.08	0	0.031	0.074	0	0.029	0.018	15.307	15.953	14.958	15.25	0.259	0.0226205	14-12-2019	B6-15	15°C	up	15
20	Track_20	45	0	0	0	0	0	44	0	44	21.158	20	89.877	36.732	0	0.483	0.607	0	0.494	0.084	13.773	14.562	12.989	13.776	0.36	-0.00256588	14-12-2019	B6-15	15°C	down	15
21	Track_21	36	0	0	0	0	0	35	0	35	3.318	21	128.416	60.87	0	0.143	1.145	0.036	0.109	0.179	12.832	14.963	8.162	13.311	1.739	-0.0386133	14-12-2019	B6-15	15°C	down	15
22	Track_22	45	0	0	0	0	0	44	0	44	8.228	22	73.944	75.194	0	0.33	0.566	0	0.329	0.116	13.924	15.825	12.02	13.843	1.145	-0.0711102	14-12-2019	B6-15	15°C	down	15
23	Track_23	45	0	0	0	0	0	44	0	44	12.191	23	100.438	77.193	0	0.291	0.713	0	0.285	0.174	19.192	20.17	18.386	19.157	0.394	-0.0407547	14-12-2019	B6-15	15°C	down	15
24	Track_24	13	0	0	0	0	0	12	0	12	5.775	24	126.871	52.824	0	0.509	0.673	0.134	0.561	0.138	13.949	16.127	9.799	14.458	1.944	0.0134701	14-12-2019	B6-15	15°C	up	15
25	Track_25	43	1	2	0	0	0	44	0	44	5.165	25	139.383	40.643	0	0.234	0.756	0	0.242	0.139	13.516	14.957	11.923	13.592	0.706	-0.137027	14-12-2019	B6-15	15°C	down	15
26	Track_26	5	1	1	0	0	0	5	0	5	5.063	26	102.55	106.85	0	1.02	1.075	0.966	1.051	0.051	9.13	9.743	8.51	9.191	0.492	-0.114687	14-12-2019	B6-15	15°C	down	15
27	Track_27	45	0	0	0	0	0	44	0	44	21.822	27	108.73	83.274	0	0.507	0.734	0	0.517	0.147	16.849	18.124	16.114	16.817	0.44	-0.0024186	14-12-2019	B6-15	15°C	down	15
28	Track_28	42	1	3	0	0	0	44	0	44	0.935	28	83.711	100.083	0	0.368	0.715	0	0.287	0.184	14.658	16.11	13.111	14.884	0.787	0.101233	14-12-2019	B6-15	15°C	up	15
29	Track_29	45	0	0	0	0	0	44	0	44	3.986	29	109.094	49.714	0	0.117	0.203	0	0.115	0.043	12.687	14.056	10.597	12.778	0.892	-0.0112731	14-12-2019	B6-15	15°C	down	15
30	Track_30	38	2	5	0	0	0	44	0	44	3.896	30	65.705	95.089	0	0.154	0.328	0	0.147	0.074	16.556	21.401	14.796	16.542	1.34	-0.0518477	14-12-2019	B6-15	15°C	down	15
31	Track_31	21	1	3	0	0	0	23	0	23	3.471	31	76.231	100.406	0	0.405	0.634	0.216	0.281	0.167	12.855	13.522	12.376	12.839	0.29	-0.00426924	14-12-2019	B6-15	15°C	down	15
32	Track_32	5	0	0	0	0	0	4	0	4	2.279	32	115.377	84.448	0	0.571	0.603	0.533	0.591	0.032	8.602	9.045	8.195	8.647	0.334	-0.0150497	14-12-2019	B6-15	15°C	down	15
33	Track_33	45	0	0	0	0	0	44	0	44	16.582	33	79.53	52.424	0	0.418	0.538	0	0.438	0.09	16.263	17.318	14.62	16.316	0.631	0.4942	14-12-2019	B6-15	15°C	up	15
34	Track_34	45	0	0	0	0	0	44	0	44	10.267	34	77.877	97.489	0	0.236	0.319	0	0.239	0.046	15.099	16.322	13.918	15.032	0.622	-0.0388095	14-12-2019	B6-15	15°C	down	15
35	Track_35	17	0	0	0	0	0	16	0	16	3.341	35	57.464	99.537	0	0.211	0.271	0.136	0.219	0.035	14.788	15.562	13.306	15.167	0.827	-0.0280174	14-12-2019	B6-15	15°C	down	15
36	Track_36	45	0	0	0	0	0	44	0	44	14.091	36	47.247	87.164	0	0.346	0.628	0	0.344	0.137	14.167	15.777	11.983	14.632	1.054	0.147208	14-12-2019	B6-15	15°C	up	15
37	Track_37	45	0	0	0	0	0	44	0	44	15.656	37	106.841	73.596	0	0.358	0.451	0	0.37	0.063	14.66	15.525	13.826	14.664	0.327	-0.0613418	14-12-2019	B6-15	15°C	down	15
38	Track_38	45	0	0	0	0	0	44	0	44	18.594	38	81.781	76.09	0	0.434	0.578	0	0.457	0.088	14.511	16.042	11.844	14.775	1.19	-0.0175918	14-12-2019	B6-15	15°C	down	15
39	Track_39	45	0	0	0	0	0	44	0	44	18.412	39	110.665	98.254	0	0.424	0.514	0	0.441	0.078	16.284	16.981	14.391	16.376	0.561	-0.0250086	14-12-2019	B6-15	15°C	down	15
40	Track_40	45	0	0	0	0	0	44	0	44	23.374	40	103.147	51.066	0	0.536	0.655	0	0.551	0.089	15.13	17.304	12.229	15.345	1.187	0.0315784	14-12-2019	B6-15	15°C	up	15
41	Track_41	45	0	0	0	0	0	44	0	44	15.69	41	95.204	83.392	0	0.363	0.459	0	0.377	0.068	17.025	17.602	16.383	17.046	0.353	-0.071219	14-12-2019	B6-15	15°C	down	15
42	Track_42	45	0	0	0	0	0	44	0	44	7.032	42	50.868	95.75	0	0.272	0.504	0	0.298	0.112	15.904	16.693	14.89	15.91	0.448	-0.00685231	14-12-2019	B6-15	15°C	down	15
43	Track_43	45	0	0	0	0	0	44	0	44	1.505	43	65.759	58.743	0	0.199	0.483	0	0.197	0.107	15.297	16.336	14.35	15.257	0.46	-0.080981	14-12-2019	B6-15	15°C	down	15
44	Track_44	45	0	0	0	0	0	44	0	44	2.513	44	133.45	77.338	0	0.231	0.456	0	0.245	0.116	15.392	16.834	13.478	15.395	0.912	-0.00116364	14-12-2019	B6-15	15°C	down	15
45	Track_45	45	0	0	0	0	0	44	0	44	9.252	45	57.491	45.277	0	0.243	0.341	0	0.263	0.066	19.149	20.177	17.375	19.339	0.67	-0.018536	14-12-2019	B6-15	15°C	down	15
46	Track_46	45	0	0	0	0	0	44	0	44	15.293	46	86.517	81.471	0	0.364	0.456	0	0.374	0.064	15.686	16.95	13.65	15.822	0.744	0.21236	14-12-2019	B6-15	15°C	up	15
47	Track_47	45	0	0	0	0	0	44	0	44	6.479	47	123.49	99.053	0	0.199	0.389	0	0.2	0.098	13.67	16.227	11.764	13.416	1.303	-0.0237818	14-12-2019	B6-15	15°C	down	15
48	Track_48	45	0	0	0	0	0	44	0	44	7.696	48	56.972	70.744	0	0.18	0.294	0	0.191	0.056	15.503	16.314	14.661	15.515	0.435	0.0388383	14-12-2019	B6-15	15°C	up	15
49	Track_49	45	0	0	0	0	0	44	0	44	15.38	49	107.206	85.268	0	0.353	0.499	0	0.362	0.084	17.71	18.477	16.559	17.737	0.394	0.0401711	14-12-2019	B6-15	15°C	up	15
50	Track_50	45	0	0	0	0	0	44	0	44	12.43	50	89.996	65.574	0	0.299	0.401	0	0.304	0.071	17.544	18.208	16.92	17.534	0.316	0.0202111	14-12-2019	B6-15	15°C	up	15
51	Track_51	45	0	0	0	0	0	44	0	44	8.196	51	80.616	45.163	0	0.288	0.537	0	0.285	0.116	15.532	17.438	13.192	15.485	1.063	-0.039549	14-12-2019	B6-15	15°C	down	15
52	Track_52	45	0	0	0	0	0	44	0	44	8.168	52	122.901	88.067	0	0.236	0.698	0	0.178	0.191	13.194	14.325	12.205	13.196	0.471	-0.0120507	14-12-2019	B6-15	15°C	down	15
53	Track_53	45	0	0	0	0	0	44	0	44	13.917	53	108.85	103.024	0	0.352	0.498	0	0.354	0.097	14.589	16.467	13.22	14.653	0.727	-0.00328274	14-12-2019	B6-15	15°C	down	15
54	Track_54	36	0	0	0	0	0	35	9	44	13.922	54	137.35	49.957	0	0.408	0.623	0	0.419	0.108	17.477	20.493	9.968	17.277	2.137	0.0286121	14-12-2019	B6-15	15°C	up	15
55	Track_55	13	1	6	0	0	0	18	12	30	2.833	55	38.806	103.743	0	0.264	0.864	0.042	0.171	0.238	10.895	13.218	8.48	10.911	1.501	-0.145744	14-12-2019	B6-15	15°C	down	15
56	Track_56	32	0	0	0	0	0	31	13	44	22.193	56	130.369	96.781	0	0.724	0.911	0	0.76	0.189	14.053	16.942	11.161	14.353	1.344	-0.0161138	14-12-2019	B6-15	15°C	down	15
57	Track_57	13	2	4	0	0	0	18	15	33	5.427	57	118.656	91.686	0	0.406	0.579	0.167	0.488	0.152	9.089	9.851	8.217	9.265	0.54	0.145503	14-12-2019	B6-15	15°C	up	15
58	Track_58	28	0	0	0	0	0	27	17	44	6.727	58	49.178	99.494	0	0.253	0.332	0	0.263	0.059	14.88	15.865	13.544	14.955	0.644	0.103607	14-12-2019	B6-15	15°C	up	15
59	Track_59	7	0	0	0	0	0	6	29	35	2.553	59	67.975	100.454	0	0.43	0.485	0.383	0.439	0.042	13.562	14.137	12.777	13.665	0.469	-0.0830599	14-12-2019	B6-15	15°C	down	15
60	Track_60	2	0	0	0	0	0	1	31	32	0.482	60	143.253	58.178	0	0.482	0.482	0.482	0.482	NA	19.866	20.045	19.687	20.045	0.179	-0.0411786	14-12-2019	B6-15	15°C	down	15
61	Track_61	14	0	0	0	0	0	13	31	44	2.5	61	50.707	43.797	0	0.195	0.26	0	0.216	0.065	8.706	9.326	8.242	8.68	0.322	-0.479	14-12-2019	B6-15	15°C	down	15
62	Track_62	14	0	0	0	0	0	13	31	44	3.904	62	131.742	40.349	0	0.345	0.523	0	0.364	0.13	16.872	18.251	15.325	17.241	0.774	0.0712022	14-12-2019	B6-15	15°C	up	15
63	Track_63	13	0	0	0	0	0	12	32	44	1.418	63	131.029	59.272	0	0.132	0.275	0	0.141	0.071	13.429	14.137	12.584	13.496	0.407	-0.142123	14-12-2019	B6-15	15°C	down	15
64	Track_64	10	0	0	0	0	0	9	35	44	3.625	64	46.286	31.952	0	0.433	0.781	0	0.429	0.201	16.005	22.239	13.79	15.967	2.215	-0.0820714	14-12-2019	B6-15	15°C	down	15
65	Track_65	4	0	0	0	0	0	3	37	40	0.577	65	140.412	103.021	0	0.192	0.208	0.181	0.189	0.014	8.848	9.079	8.464	9.072	0.253	0.243727	14-12-2019	B6-15	15°C	up	15
66	Track_66	5	0	0	0	0	0	4	40	44	0.8	66	58.875	30.997	0	0.2	0.4	0	0.2	0.163	18.601	22.305	13.498	20.108	3.749	-0.0977	14-12-2019	B6-15	15°C	down	15
67	Track_67	3	0	0	0	0	0	2	42	44	0.09	67	129.953	74.478	0	0.045	0.09	0	0.09	0.064	14.094	14.918	12.445	14.918	1.165	0	14-12-2019	B6-15	15°C	up	15
1	Track_1	41	0	0	0	0	0	40	0	40	43.237	1	101.689	73.232	0	1.084	1.379	0	1.173	0.308	12.082	13.991	10.531	11.96	0.678	0.0869237	14-12-2019	B6	13°C	up	15
2	Track_2	37	2	3	0	0	0	40	0	40	24.006	2	26.983	39.125	0	0.614	0.764	0	0.673	0.168	11.156	13.283	8.924	10.914	1.338	-0.0268068	14-12-2019	B6	13°C	down	15
3	Track_3	41	0	0	0	0	0	40	0	40	9.272	3	86.195	29.115	0	0.234	0.364	0	0.23	0.079	15.881	16.609	14.919	15.836	0.405	0.613319	14-12-2019	B6	13°C	up	15
4	Track_4	41	0	0	0	0	0	40	0	40	33.976	4	62.192	58.715	0	0.878	1.212	0	0.939	0.23	14.445	15.939	10.179	14.482	0.881	-0.108972	14-12-2019	B6	13°C	down	15
5	Track_5	40	1	1	0	0	0	40	0	40	14.05	5	116.373	32.832	0	0.405	0.792	0	0.4	0.213	11.04	13.076	8.756	11.034	0.972	0.171847	14-12-2019	B6	13°C	up	15
6	Track_6	41	0	0	0	0	0	40	0	40	29.41	6	95.276	41.584	0	0.74	1.031	0	0.779	0.215	11.87	14.504	9.958	12.119	0.928	-0.255679	14-12-2019	B6	13°C	down	15
7	Track_7	41	0	0	0	0	0	40	0	40	14.542	7	34.484	34.039	0	0.43	0.694	0	0.458	0.166	15.245	16.141	14.059	15.314	0.458	-0.072472	14-12-2019	B6	13°C	down	15
8	Track_8	38	2	2	0	0	0	40	0	40	8.472	8	28.589	67.125	0	0.409	0.785	0	0.422	0.185	14.487	16.926	11.474	14.686	1.465	0.40152	14-12-2019	B6	13°C	up	15
9	Track_9	41	0	0	0	0	0	40	0	40	12.179	9	44.724	51.31	0	0.398	0.664	0	0.44	0.175	11.714	13.747	9.816	11.859	0.863	0.150673	14-12-2019	B6	13°C	up	15
10	Track_10	12	1	5	0	0	0	16	0	16	10.082	10	41.549	80.089	0	0.665	0.763	0.565	0.673	0.059	9.036	9.402	8.366	9.187	0.302	0.099404	14-12-2019	B6	13°C	up	15
11	Track_11	41	0	0	0	0	0	40	0	40	0.079	11	51.152	74.185	0	0.009	0.024	0	0.008	0.006	11.446	11.688	11.263	11.435	0.096	0.213863	14-12-2019	B6	13°C	up	15
12	Track_12	41	0	0	0	0	0	40	0	40	1.092	12	108.09	18.745	0	0.115	0.24	0	0.124	0.062	16.106	16.997	15.537	16.12	0.38	-5.34843e-05	14-12-2019	B6	13°C	down	15
13	Track_13	41	0	0	0	0	0	40	0	40	4.074	13	66.886	56.923	0	0.147	0.304	0	0.138	0.079	12.717	14.26	11.854	12.525	0.62	0.00522195	14-12-2019	B6	13°C	up	15
14	Track_14	41	0	0	0	0	0	40	0	40	2.334	14	105.36	50.333	0	0.128	0.285	0	0.12	0.073	11.055	11.767	10.031	11.096	0.385	-0.0240659	14-12-2019	B6	13°C	down	15
15	Track_15	41	0	0	0	0	0	40	0	40	45.939	15	92.408	70.025	0	1.15	1.374	0	1.223	0.287	13.422	14.749	12.455	13.273	0.583	-0.0137362	14-12-2019	B6	13°C	down	15
16	Track_16	41	0	0	0	0	0	40	0	40	19.076	16	74.664	65.091	0	0.49	0.702	0	0.562	0.197	17.094	17.845	15.885	17.223	0.433	0.0237929	14-12-2019	B6	13°C	up	15
17	Track_17	39	1	2	0	0	0	40	0	40	6.066	17	29.324	69.323	0	0.26	0.497	0	0.266	0.12	12.219	14.19	10.058	12.582	1.093	-0.162733	14-12-2019	B6	13°C	down	15
18	Track_18	21	4	5	0	0	0	33	0	33	12.509	18	25.358	44.14	0	0.474	1.058	0.022	0.422	0.315	10.546	12.759	8.438	10.476	1.164	0.0795565	14-12-2019	B6	13°C	up	15
19	Track_19	41	0	0	0	0	0	40	0	40	21.207	19	61.661	30.849	0	0.533	0.674	0	0.595	0.151	16.039	17.056	15.483	15.973	0.33	0.324757	14-12-2019	B6	13°C	up	15
20	Track_20	7	1	8	0	0	0	14	2	16	1.125	20	137.239	29.864	0	0.104	0.187	0	0.187	0.094	16.136	19.14	9.22	18.138	3.781	-0.0118056	14-12-2019	B6	13°C	down	15
21	Track_21	39	0	0	0	0	0	38	2	40	0.022	21	76.203	21.377	0	0.009	0.027	0	0.008	0.006	9.076	9.37	8.713	9.135	0.199	-0.0776103	14-12-2019	B6	13°C	down	15
22	Track_22	13	1	1	0	0	0	13	23	36	5.04	22	22.873	44.785	0	0.404	0.633	0.198	0.418	0.161	10.376	12.124	8.492	10.505	1.041	-0.00021498	14-12-2019	B6	13°C	down	15
23	Track_23	10	3	4	0	0	0	17	23	40	13.226	23	59.489	82.797	0	0.697	1.072	0	0.834	0.407	8.506	8.723	8.339	8.553	0.124	0.420507	14-12-2019	B6	13°C	up	15
1	Track_1	40	1	2	0	0	0	41	0	41	32.375	1	66.115	72.678	0	0.848	1.178	0	1.002	0.388	12.696	15.316	10.472	12.742	1.198	-0.0672607	14-12-2019	B6	13°C	down	15
2	Track_2	42	0	0	0	0	0	41	0	41	16.42	2	48.516	49.356	0	0.447	0.633	0	0.446	0.097	14.329	15.068	13.559	14.367	0.403	-0.0656787	14-12-2019	B6	13°C	down	15
3	Track_3	42	0	0	0	0	0	41	0	41	24.726	3	92.084	27.26	0	0.604	0.661	0	0.616	0.098	15.675	16.378	15.151	15.682	0.296	0.101882	14-12-2019	B6	13°C	up	15
4	Track_4	42	0	0	0	0	0	41	0	41	0.053	4	137.742	37.12	0	0.401	0.638	0	0.46	0.194	17.081	20.08	12.687	17.281	2.353	-0.0636568	14-12-2019	B6	13°C	down	15
5	Track_5	42	0	0	0	0	0	41	0	41	9.639	5	129.276	67.641	0	0.252	0.489	0	0.261	0.117	12.325	13.584	11.49	12.278	0.456	0.0156717	14-12-2019	B6	13°C	up	15
6	Track_6	17	2	3	0	0	0	20	0	20	6.724	6	49.061	73.043	0	0.348	1.08	0.0009479	0.011	0.474	11.363	14.369	10.377	10.625	1.339	-0.0255359	14-12-2019	B6	13°C	down	15
7	Track_7	42	0	0	0	0	0	41	0	41	4.174	7	73.189	23.961	0	0.135	0.31	0	0.1	0.086	14.032	15.524	12.642	14.12	0.695	0.0411405	14-12-2019	B6	13°C	up	15
8	Track_8	26	1	4	0	0	0	29	0	29	14.412	8	74.609	71.01	0	0.499	0.55	0.479	0.496	0.014	17.291	17.769	16.443	17.298	0.284	-0.0567134	14-12-2019	B6	13°C	down	15
9	Track_9	40	2	1	0	0	0	41	0	41	11.236	9	61.416	53.501	0	0.288	0.407	0	0.297	0.078	11.707	12.872	10.522	11.714	0.601	0.362972	14-12-2019	B6	13°C	up	15
10	Track_10	42	0	0	0	0	0	41	0	41	29.933	10	47.486	37.143	0	0.737	1.052	0	0.883	0.294	12.632	14.026	11.441	12.503	0.629	-0.0744003	14-12-2019	B6	13°C	down	15
11	Track_11	29	8	4	0	0	0	41	0	41	2.252	11	106.875	48.973	0	0.114	0.236	0	0.123	0.067	10.663	11.061	10.343	10.626	0.205	-0.0735798	14-12-2019	B6	13°C	down	15
12	Track_12	3	0	0	0	0	0	2	2	4	0.262	12	37.334	70.963	0	0.132	0.144	0.12	0.144	0.017	10.511	10.552	10.445	10.534	0.047	-0.0110791	14-12-2019	B6	13°C	down	15
13	Track_13	9	2	4	0	0	0	16	1	17	2.956	13	127.903	70.736	0	0.198	0.295	0.133	0.192	0.061	10.51	10.958	10.285	10.431	0.215	0.0735	14-12-2019	B6	13°C	up	15
14	Track_14	37	2	1	0	0	0	38	3	41	4.589	14	40.539	55.962	0	0.263	0.491	0	0.28	0.132	11.901	13.079	10.497	11.995	0.596	-0.03442	14-12-2019	B6	13°C	down	15
15	Track_15	26	10	2	0	0	0	38	1	39	38.281	15	81.032	26.207	0	1.039	1.153	0.85	1.046	0.073	11.199	12.188	10.285	11.109	0.541	0.102382	14-12-2019	B6	13°C	up	15
16	Track_16	2	0	0	0	0	0	1	5	6	0	16	52.037	19.815	0	0	0	0	0	NA	10.38	10.426	10.333	10.426	0.046	-0.0294221	14-12-2019	B6	13°C	down	15
17	Track_17	22	0	0	0	0	0	21	20	41	3.207	17	41.878	72.622	0	0.153	0.198	0	0.173	0.047	10.739	11.22	10.357	10.812	0.247	0	14-12-2019	B6	13°C	up	15
18	Track_18	2	0	0	0	0	0	1	40	41	0	18	129.489	71.271	0	0	0	0	0	NA	10.57	10.57	10.57	10.57	0	0.0310858	14-12-2019	B6	13°C	up	15
1	Track_1	48	0	0	0	0	0	47	0	47	10.602	1	35.166	69.001	0	0.226	0.363	0	0.211	0.085	11.715	12.257	10.963	11.821	0.39	0.00681709	14-12-2019	B6	13°C	up	15
2	Track_2	48	0	0	0	0	0	47	0	47	4.761	2	93.704	93.237	0	0.14	0.26	0	0.141	0.056	12.575	13.532	11.591	12.66	0.517	-0.016977	14-12-2019	B6	13°C	down	15
3	Track_3	48	0	0	0	0	0	47	0	47	19.454	3	50.851	28.304	0	0.42	0.661	0	0.524	0.182	15.25	16.837	13.126	15.246	0.864	0.00252915	14-12-2019	B6	13°C	up	15
4	Track_4	48	0	0	0	0	0	47	0	47	5.503	4	78.905	55.23	0	0.125	0.174	0	0.13	0.03	15.063	15.834	13.876	15.152	0.491	0.350719	14-12-2019	B6	13°C	up	15
5	Track_5	48	0	0	0	0	0	47	0	47	13.723	5	82.656	69.913	0	0.314	0.584	0	0.329	0.151	13.573	15.053	12.004	13.849	0.769	0.0718951	14-12-2019	B6	13°C	up	15
6	Track_6	41	1	7	0	0	0	47	0	47	0.013	6	75.428	19.825	0	0.006	0.031	0	0.005	0.006	10.69	10.855	10.24	10.725	0.156	0.211375	14-12-2019	B6	13°C	up	15
7	Track_7	48	0	0	0	0	0	47	0	47	2.365	7	42.39	75.597	0	0.133	0.311	0	0.121	0.083	15.578	16.225	14.786	15.617	0.321	0.000142393	14-12-2019	B6	13°C	up	15
8	Track_8	48	0	0	0	0	0	47	0	47	9.972	8	55.953	39.073	0	0.226	0.391	0	0.219	0.075	11.594	12.335	10.741	11.565	0.407	-0.0719081	14-12-2019	B6	13°C	down	15
9	Track_9	33	0	0	0	0	0	32	0	32	3.668	9	133.854	44.873	0	0.139	0.313	0.072	0.12	0.056	16.233	17.495	14.708	16.409	0.724	-0.0353101	14-12-2019	B6	13°C	down	15
10	Track_10	5	1	6	0	0	0	10	0	10	1.659	10	108.329	86.89	0	0.221	0.289	0.163	0.258	0.062	10.425	10.691	10.288	10.392	0.14	-0.0603125	14-12-2019	B6	13°C	down	15
11	Track_11	48	0	0	0	0	0	47	0	47	9.013	11	82.7	64.122	0	0.197	0.34	0	0.185	0.06	14.294	15.17	13.183	14.276	0.404	0.000251121	14-12-2019	B6	13°C	up	15
12	Track_12	48	0	0	0	0	0	47	0	47	16.362	12	37.465	61.364	0	0.415	0.668	0	0.424	0.138	16.141	17.29	13.275	16.354	0.833	0.140899	14-12-2019	B6	13°C	up	15
13	Track_13	18	0	0	0	0	0	17	0	17	5.931	13	27.439	68.041	0	0.357	0.651	0.14	0.369	0.106	14.194	18.825	12.606	14.014	1.236	-0.134683	14-12-2019	B6	13°C	down	15
14	Track_14	48	0	0	0	0	0	47	0	47	17.971	14	28.183	36.704	0	0.402	0.753	0	0.344	0.206	14.108	17.403	12.072	14.017	1.107	-0.209617	14-12-2019	B6	13°C	down	15
15	Track_15	46	2	1	0	0	0	47	0	47	0	15	118.148	96.667	0	0	0	0	0	0	10.436	10.703	10.232	10.461	0.122	0.350794	14-12-2019	B6	13°C	up	15
16	Track_16	9	1	4	0	0	0	12	0	12	6.565	16	27.123	44.229	0	0.567	0.68	0.37	0.592	0.094	11.921	14.879	10.237	11.802	1.324	2.07189e-15	14-12-2019	B6	13°C	up	15
17	Track_17	10	0	0	0	0	0	9	0	9	0.791	17	134.901	35.373	0	0.237	0.368	0.077	0.224	0.097	12.126	12.759	11.011	12.283	0.562	0.4743	14-12-2019	B6	13°C	up	15
18	Track_18	46	2	1	0	0	0	47	0	47	7.218	18	52.151	82.935	0	0.284	0.553	0	0.284	0.122	12.413	15.66	10.271	12.446	1.078	-0.0016	14-12-2019	B6	13°C	down	15
19	Track_19	35	1	7	0	0	0	41	6	47	9.281	19	122.098	42.461	0	0.215	0.308	0	0.218	0.074	11.268	12.871	10.223	11.374	0.753	0.0153301	14-12-2019	B6	13°C	up	15
20	Track_20	22	8	7	0	0	0	37	6	43	13.867	20	34.091	23.176	0	0.458	0.846	0.122	0.459	0.216	11.264	12.147	10.34	11.26	0.522	-0.011629	14-12-2019	B6	13°C	down	15
21	Track_21	37	0	0	0	0	0	36	11	47	0.025	21	49.596	70.975	0	0.011	0.051	0	0.01	0.011	10.636	10.996	10.247	10.627	0.186	0.0941258	14-12-2019	B6	13°C	up	15
22	Track_22	2	0	0	0	0	0	1	11	12	0.447	22	90.225	89.361	0	0.447	0.447	0.447	0.447	NA	10.401	10.504	10.297	10.504	0.103	-0.000144144	14-12-2019	B6	13°C	down	15
23	Track_23	5	1	9	0	0	0	13	17	30	3.297	23	68.337	35.201	0	0.247	0.303	0.159	0.271	0.062	10.363	10.541	10.243	10.326	0.115	-0.152	14-12-2019	B6	13°C	down	15
24	Track_24	7	0	0	0	0	0	6	25	31	1.077	24	108.629	86.51	0	0.197	0.261	0.157	0.19	0.04	10.45	10.781	10.248	10.413	0.156	-0.207304	14-12-2019	B6	13°C	down	15
25	Track_25	4	1	1	0	0	0	4	29	33	0.472	25	34.638	82.031	0	0.243	0.373	0.152	0.204	0.115	10.734	11.372	10.405	10.719	0.388	0.0721429	14-12-2019	B6	13°C	up	15
26	Track_26	10	0	0	0	0	0	9	31	40	0.523	26	84.818	91.015	0	0.066	0.135	0.013	0.053	0.039	11.371	11.743	11.091	11.334	0.217	-0.1224	14-12-2019	B6	13°C	down	15
1	Track_1	37	1	4	0	0	0	40	0	40	12.921	1	68.342	76.405	0	0.252	1.305	0	0.011	0.493	8.228	13.805	6.251	6.971	2.517	-0.0013315	14-12-2019	B7-15	15°C	down	15
2	Track_2	41	0	0	0	0	0	40	0	40	11.789	2	92.377	69.551	0	0.748	1.409	0	0.808	0.372	12.365	14.425	7.929	13.098	1.959	-0.00410973	14-12-2019	B7-15	15°C	down	15
3	Track_3	9	0	0	0	0	0	8	0	8	6.366	3	116.966	23.088	0	0.802	0.994	0.546	0.897	0.164	7.484	8.503	6.53	7.379	0.576	0.0052892	14-12-2019	B7-15	15°C	up	15
4	Track_4	25	1	7	0	0	0	31	0	31	18.812	4	121.395	26.827	0	0.648	0.836	0.382	0.66	0.118	11.561	12.762	9.356	11.752	0.774	-0.466033	14-12-2019	B7-15	15°C	down	15
5	Track_5	40	1	1	0	0	0	40	0	40	31.136	5	60.633	69.901	0	0.985	1.568	0	1.022	0.423	10.821	13.648	8.248	10.533	1.747	-0.41731	14-12-2019	B7-15	15°C	down	15
6	Track_6	39	1	2	0	0	0	40	0	40	8.938	6	97.881	26.761	0	0.558	0.975	0	0.568	0.246	11.484	13.283	10.06	11.423	0.912	-0.0240558	14-12-2019	B7-15	15°C	down	15
7	Track_7	22	1	2	0	0	0	23	0	23	13.24	7	109.188	83.455	0	0.581	0.685	0.522	0.576	0.038	10.537	11.063	9.483	10.666	0.415	-0.223082	14-12-2019	B7-15	15°C	down	15
8	Track_8	38	0	0	0	0	0	37	0	37	31.42	8	103.291	85.381	0	0.893	1.544	0.275	0.845	0.456	8.735	10.001	6.815	8.756	0.684	0.569711	14-12-2019	B7-15	15°C	up	15
9	Track_9	37	1	4	0	0	0	40	0	40	2.312	9	118.521	57.657	0	0.321	0.516	0	0.367	0.13	11.859	12.8	10.77	11.884	0.53	0.21969	14-12-2019	B7-15	15°C	up	15
10	Track_10	41	0	0	0	0	0	40	0	40	9.911	10	105.227	54.11	0	0.329	0.529	0	0.316	0.137	10.136	10.919	9.222	10.174	0.457	-0.0594231	14-12-2019	B7-15	15°C	down	15
11	Track_11	41	0	0	0	0	0	40	0	40	47.381	11	59.167	61.346	0	1.193	1.491	0	1.178	0.234	8.901	9.839	7.948	8.962	0.593	-0.158262	14-12-2019	B7-15	15°C	down	15
12	Track_12	41	0	0	0	0	0	40	0	40	0	12	132.946	22.475	0	0	0	0	0	0	7.493	7.722	7.267	7.496	0.102	0.13352	14-12-2019	B7-15	15°C	up	15
13	Track_13	41	0	0	0	0	0	40	0	40	11.799	13	107.271	51.138	0	0.424	0.724	0	0.429	0.15	11.947	12.933	10.873	11.942	0.503	0	14-12-2019	B7-15	15°C	up	15
14	Track_14	41	0	0	0	0	0	40	0	40	34.076	14	88.377	58.536	0	0.944	1.237	0	0.938	0.194	13.569	15.176	11.634	13.429	0.826	-0.215496	14-12-2019	B7-15	15°C	down	15
15	Track_15	41	0	0	0	0	0	40	0	40	10.678	15	123.39	53.3	0	0.284	0.698	0	0.198	0.191	11.708	13.12	10.275	11.888	0.764	-0.137728	14-12-2019	B7-15	15°C	down	15
16	Track_16	41	0	0	0	0	0	40	0	40	15.142	16	69.291	48.453	0	0.544	0.972	0	0.627	0.253	11.022	11.7	8.88	11.246	0.653	-0.167131	14-12-2019	B7-15	15°C	down	15
17	Track_17	39	2	1	0	0	0	40	0	40	11.597	17	128.239	74.736	0	0.301	0.676	0	0.257	0.16	11.398	14.492	8.99	11.428	1.312	-0.332355	14-12-2019	B7-15	15°C	down	15
18	Track_18	10	1	1	0	0	0	10	0	10	8.957	18	105.933	80.265	0	0.949	1.172	0.761	0.949	0.141	9.253	11.209	7.533	9.573	1.092	0.129423	14-12-2019	B7-15	15°C	up	15
19	Track_19	41	0	0	0	0	0	40	0	40	30.591	19	97.513	39.455	0	0.779	0.972	0	0.794	0.156	8.595	9.89	7.558	8.434	0.645	0.171701	14-12-2019	B7-15	15°C	up	15
20	Track_20	35	2	3	0	0	0	40	0	40	16.591	20	101.702	79.853	0	0.635	0.845	0	0.696	0.197	7.765	9.405	6.1	7.757	0.858	-0.327959	14-12-2019	B7-15	15°C	down	15
21	Track_21	2	0	0	0	0	0	1	3	4	0.422	21	126.19	19.337	0	0.422	0.422	0.422	0.422	NA	12.44	12.808	12.071	12.808	0.369	0.121217	14-12-2019	B7-15	15°C	up	15
22	Track_22	40	1	1	0	0	0	40	0	40	3.597	22	66.362	27.699	0	1.232	1.602	0	1.332	0.331	11.356	13.452	6.32	11.535	1.456	-0.422	14-12-2019	B7-15	15°C	down	15
23	Track_23	18	0	0	0	0	0	17	0	17	7.23	23	104.932	21.248	0	0.469	0.645	0.295	0.477	0.109	7.619	11.654	6.404	7.369	1.127	-0.0580751	14-12-2019	B7-15	15°C	down	15
24	Track_24	37	1	4	0	0	0	40	0	40	8.589	24	119.804	55.41	0	0.322	0.598	0	0.268	0.159	12.258	13.17	10.599	12.409	0.585	-0.331405	14-12-2019	B7-15	15°C	down	15
25	Track_25	41	0	0	0	0	0	40	0	40	22.803	25	95.749	43.761	0	0.572	1.012	0	0.706	0.305	11.123	12.554	9.404	11.094	0.744	-0.108241	14-12-2019	B7-15	15°C	down	15
26	Track_26	41	0	0	0	0	0	40	0	40	19.76	26	87.459	51.407	0	0.514	0.87	0	0.566	0.243	10.929	12.552	9.053	10.975	0.82	-0.374266	14-12-2019	B7-15	15°C	down	15
27	Track_27	39	1	2	0	0	0	40	0	40	15.407	27	79.04	25.61	0	0.802	1.095	0	0.847	0.279	11.555	12.428	10.618	11.6	0.422	-0.0307237	14-12-2019	B7-15	15°C	down	15
28	Track_28	7	1	1	0	0	0	7	0	7	9.579	28	26.945	54.352	0	1.404	1.653	1.081	1.503	0.229	12.849	14.311	11.026	13.048	1.018	-0.0669895	14-12-2019	B7-15	15°C	down	15
29	Track_29	41	0	0	0	0	0	40	0	40	4.123	29	37.88	74.223	0	0.271	0.591	0	0.256	0.142	9.385	10.368	8.416	9.427	0.436	0.21446	14-12-2019	B7-15	15°C	up	15
30	Track_30	6	0	0	0	0	0	5	0	5	3.271	30	119.864	85.168	0	0.655	0.741	0.495	0.682	0.099	12.576	12.976	12.227	12.641	0.261	-0.0423193	14-12-2019	B7-15	15°C	down	15
31	Track_31	29	2	6	0	0	0	35	0	35	5.054	31	89.533	50.648	0	0.315	0.608	0.159	0.31	0.109	13.346	14.315	11.84	13.319	0.512	0.562571	14-12-2019	B7-15	15°C	up	15
32	Track_32	41	0	0	0	0	0	40	0	40	35.446	32	46.479	56.983	0	0.887	1.272	0	1.024	0.328	11.73	12.368	10.851	11.748	0.343	-0.137704	14-12-2019	B7-15	15°C	down	15
33	Track_33	41	0	0	0	0	0	40	0	40	25.058	33	101.733	31.855	0	0.676	1.133	0	0.694	0.248	11.955	13.344	9.956	12.045	0.8	-0.0877591	14-12-2019	B7-15	15°C	down	15
34	Track_34	4	1	3	0	0	0	6	2	8	0.01	34	64.115	78.767	0	0.006	0.008	0.003	0.006	0.002	7.669	7.712	7.633	7.672	0.029	-0.376543	14-12-2019	B7-15	15°C	down	15
35	Track_35	15	1	2	0	0	0	16	7	23	0.074	35	24.621	37.501	0	0.089	0.27	0.018	0.083	0.076	5.863	6.032	5.712	5.845	0.084	-0.000846154	14-12-2019	B7-15	15°C	down	15
36	Track_36	28	2	4	0	0	0	33	7	40	26.599	36	57.966	76.799	0	0.816	1.415	0	1.193	0.606	11.121	14.142	6.965	13.087	3.035	0.00273859	14-12-2019	B7-15	15°C	up	15
37	Track_37	31	1	1	0	0	0	31	9	40	6.443	37	45.102	24.725	0	0.978	1.387	0	1.031	0.296	11.736	13.979	8.606	12.128	1.371	-0.0710795	14-12-2019	B7-15	15°C	down	15
38	Track_38	2	0	0	0	0	0	1	10	11	1.08	38	37.917	86.149	0	1.08	1.08	1.08	1.08	NA	5.982	6.24	5.723	6.24	0.258	0.166965	14-12-2019	B7-15	15°C	up	15
39	Track_39	28	0	0	0	0	0	27	13	40	18.718	39	38.422	27.594	0	0.706	1.158	0	0.682	0.296	9.848	11.788	7.699	10.066	1.092	0.123	14-12-2019	B7-15	15°C	up	15
40	Track_40	3	0	0	0	0	0	2	18	20	2.162	40	91.241	82.54	0	1.087	1.105	1.069	1.105	0.026	9.885	10.407	9.312	9.938	0.449	0.669551	14-12-2019	B7-15	15°C	up	15
41	Track_41	21	0	0	0	0	0	20	20	40	26.478	41	77.97	79.972	0	1.337	1.538	0	1.453	0.328	10.284	11.573	8.544	10.398	0.771	-0.0655	14-12-2019	B7-15	15°C	down	15
42	Track_42	14	1	4	0	0	0	17	23	40	8.562	42	29.238	22.293	0	0.832	1.156	0	0.941	0.341	10.82	12.263	8.348	11.507	1.377	0.00129221	14-12-2019	B7-15	15°C	up	15
43	Track_43	7	0	0	0	0	0	6	22	28	3.722	43	28.188	85.593	0	0.642	0.911	0.365	0.692	0.212	6.06	6.461	5.71	6.079	0.222	0.482879	14-12-2019	B7-15	15°C	up	15
44	Track_44	8	0	0	0	0	0	7	29	36	7.396	44	76.67	82.545	0	1.096	1.187	0.947	1.129	0.084	10.34	11.043	8.924	10.727	0.712	-0.247786	14-12-2019	B7-15	15°C	down	15
45	Track_45	5	0	0	0	0	0	4	36	40	3.206	45	27.114	25.713	0	0.802	1.143	0	1.123	0.542	11.989	12.646	10.961	12.446	0.733	0.113512	14-12-2019	B7-15	15°C	up	15
46	Track_46	3	0	0	0	0	0	2	38	40	0.628	46	24.526	20.793	0	0.314	0.628	0	0.628	0.444	8.284	8.811	7.231	8.811	0.745	0.8398	14-12-2019	B7-15	15°C	up	15
47	Track_47	2	0	0	0	0	0	1	39	40	0	47	27.237	18.285	0	0	0	0	0	NA	7.105	7.105	7.105	7.105	0	0.2755	14-12-2019	B7-15	15°C	up	15
1	Track_1	9	0	0	0	0	0	8	0	8	4.468	1	27.05	27.699	0	0.56	0.629	0.468	0.583	0.066	8.552	9.69	8.15	8.402	0.446	-0.00126246	14-12-2019	B7-15	15°C	down	15
2	Track_2	35	0	0	0	0	0	34	0	34	2.261	2	82.172	49.035	0	0.152	0.28	0	0.15	0.078	13.904	14.508	13.288	13.947	0.342	0.556983	14-12-2019	B7-15	15°C	up	15
3	Track_3	5	0	0	0	0	0	4	0	4	1.72	3	125.53	16.281	0	0.43	0.436	0.422	0.431	0.006	10.715	11.491	9.495	11.099	0.726	-0.0598067	14-12-2019	B7-15	15°C	down	15
4	Track_4	35	0	0	0	0	0	34	0	34	16.322	4	29.602	25.171	0	0.491	0.748	0	0.558	0.193	11.57	12.349	10.551	11.755	0.488	-0.0953	14-12-2019	B7-15	15°C	down	15
5	Track_5	35	0	0	0	0	0	34	0	34	30.697	5	107.787	28.602	0	0.906	1.274	0	0.972	0.312	13.298	13.942	12.515	13.342	0.429	0.474387	14-12-2019	B7-15	15°C	up	15
6	Track_6	35	0	0	0	0	0	34	0	34	13.578	6	101.52	53.21	0	0.404	0.571	0	0.423	0.135	11.446	12.334	9.644	11.609	0.612	0.0158193	14-12-2019	B7-15	15°C	up	15
7	Track_7	35	0	0	0	0	0	34	0	34	7.868	7	120.458	31.535	0	0.279	0.589	0	0.273	0.182	9.508	10.652	8.03	9.49	0.696	0.0299381	14-12-2019	B7-15	15°C	up	15
8	Track_8	35	0	0	0	0	0	34	0	34	7.161	8	105.014	53.021	0	0.278	0.459	0	0.293	0.101	10.895	12.107	8.959	10.993	0.697	-0.13254	14-12-2019	B7-15	15°C	down	15
9	Track_9	19	5	4	0	0	0	31	0	31	0.19	9	24.189	78.623	0	0.805	2.667	0	0.571	0.894	8.457	9.734	7.907	8.446	0.359	0.0415989	14-12-2019	B7-15	15°C	up	15
10	Track_10	30	2	3	0	0	0	34	0	34	5.004	10	102.278	70.172	0	0.16	0.608	0	0.075	0.174	9.664	11.094	7.879	10.041	0.912	0.0106723	14-12-2019	B7-15	15°C	up	15
11	Track_11	35	0	0	0	0	0	34	0	34	8.937	11	92.94	75.913	0	0.359	0.687	0	0.354	0.159	12.482	14.205	10.848	12.381	0.721	-0.0044684	14-12-2019	B7-15	15°C	down	15
12	Track_12	35	0	0	0	0	0	34	0	34	14.065	12	53.673	82.272	0	0.498	0.9	0	0.504	0.192	11.013	12.56	8.564	11.072	0.923	-0.0259731	14-12-2019	B7-15	15°C	down	15
13	Track_13	22	0	0	0	0	0	21	0	21	5.647	13	26.668	57.062	0	0.276	0.392	0	0.28	0.075	11.681	15.179	9.502	11.863	1.286	0.0222384	14-12-2019	B7-15	15°C	up	15
14	Track_14	22	2	7	0	0	0	29	0	29	2.512	14	41.845	73.776	0	0.201	0.358	0.073	0.222	0.095	8.865	9.977	7.936	9.045	0.666	0.0937058	14-12-2019	B7-15	15°C	up	15
15	Track_15	35	0	0	0	0	0	34	0	34	21.558	15	80.407	83.223	0	0.636	1.029	0	0.611	0.25	11.786	12.441	10.731	11.752	0.436	0.0419453	14-12-2019	B7-15	15°C	up	15
16	Track_16	21	1	1	0	0	0	21	0	21	13.357	16	113.612	19.444	0	0.642	0.762	0.422	0.667	0.087	12.614	13.558	10.364	12.655	0.702	-0.0135283	14-12-2019	B7-15	15°C	down	15
17	Track_17	35	0	0	0	0	0	34	0	34	6.416	17	107.759	38.016	0	0.213	0.324	0	0.243	0.092	11.89	13.054	10.871	11.847	0.515	-0.194516	14-12-2019	B7-15	15°C	down	15
18	Track_18	30	4	2	0	0	0	34	0	34	11.165	18	99.368	62.305	0	0.342	0.731	0	0.27	0.198	8.458	9.113	7.89	8.457	0.34	0.0146737	14-12-2019	B7-15	15°C	up	15
19	Track_19	35	0	0	0	0	0	34	0	34	16.845	19	110.265	80.637	0	0.545	0.961	0	0.54	0.234	10.262	12.173	8.854	10.196	0.8	-0.0221734	14-12-2019	B7-15	15°C	down	15
20	Track_20	35	0	0	0	0	0	34	0	34	6.796	20	34.867	30.384	0	0.363	0.775	0	0.332	0.221	10.983	12.407	8.271	11.004	0.942	0.0703246	14-12-2019	B7-15	15°C	up	15
21	Track_21	35	0	0	0	0	0	34	0	34	15.94	21	25.329	42.422	0	0.472	0.733	0	0.493	0.191	11.683	13.467	9.589	11.329	1.159	0.219461	14-12-2019	B7-15	15°C	up	15
22	Track_22	35	0	0	0	0	0	34	0	34	12.412	22	68.287	23.943	0	0.367	0.612	0	0.324	0.14	11.097	11.585	10.323	11.137	0.29	0.479347	14-12-2019	B7-15	15°C	up	15
23	Track_23	35	0	0	0	0	0	34	0	34	10.632	23	41.436	37.185	0	0.407	0.798	0	0.379	0.211	10.598	11.774	8.962	10.674	0.694	-0.0396824	14-12-2019	B7-15	15°C	down	15
24	Track_24	33	2	1	0	0	0	34	0	34	9.124	24	38.223	42.685	0	0.347	0.759	0	0.32	0.168	9.988	11.511	8.033	9.947	1.048	0.22217	14-12-2019	B7-15	15°C	up	15
25	Track_25	35	0	0	0	0	0	34	0	34	6.617	25	111.239	57.908	0	0.278	0.458	0	0.273	0.112	11.706	12.383	10.632	11.633	0.385	0.177085	14-12-2019	B7-15	15°C	up	15
26	Track_26	35	0	0	0	0	0	34	0	34	15.311	26	47.254	36.62	0	0.53	0.803	0	0.562	0.201	11.382	12.212	9.606	11.408	0.615	0.0261345	14-12-2019	B7-15	15°C	up	15
27	Track_27	35	0	0	0	0	0	34	0	34	13.498	27	86.463	51.324	0	0.398	0.496	0	0.452	0.118	11.134	12.029	10.146	10.991	0.515	-0.136934	14-12-2019	B7-15	15°C	down	15
28	Track_28	34	1	1	0	0	0	34	0	34	5.57	28	109.182	20.269	0	0.319	0.735	0	0.285	0.189	12.224	14.038	10.223	12.366	0.914	-0.0473681	14-12-2019	B7-15	15°C	down	15
29	Track_29	35	0	0	0	0	0	34	0	34	17.246	29	55.622	51.346	0	0.625	0.99	0	0.675	0.216	13.124	14.245	11.464	13.177	0.693	-0.0964395	14-12-2019	B7-15	15°C	down	15
30	Track_30	35	0	0	0	0	0	34	0	34	9.86	30	88.978	48.501	0	0.31	0.565	0	0.329	0.129	12.523	13.55	11.685	12.51	0.458	-0.154303	14-12-2019	B7-15	15°C	down	15
31	Track_31	34	0	0	0	0	0	33	1	34	11.076	31	61.42	67.279	0	0.336	0.438	0	0.377	0.108	13.454	14.334	12.228	13.489	0.478	-0.0142359	14-12-2019	B7-15	15°C	down	15
32	Track_32	34	0	0	0	0	0	33	1	34	20.219	32	54.911	69.255	0	0.614	0.876	0	0.611	0.201	13.547	15.228	11.018	13.431	0.929	-0.109304	14-12-2019	B7-15	15°C	down	15
33	Track_33	4	0	0	0	0	0	3	4	7	1.498	33	81.686	80.843	0	0.554	0.59	0.502	0.571	0.046	8.318	8.729	7.954	8.308	0.275	-0.0546474	14-12-2019	B7-15	15°C	down	15
34	Track_34	5	0	0	0	0	0	4	23	27	1.887	34	24.222	38.251	0	0.479	0.571	0.381	0.571	0.107	9.865	11.162	8.605	10.05	0.879	-0.0457	14-12-2019	B7-15	15°C	down	15
35	Track_35	5	0	0	0	0	0	4	30	34	0.415	35	73.059	79.189	0	0.128	0.37	0	0.142	0.175	8.251	8.406	7.949	8.299	0.156	0.471	14-12-2019	B7-15	15°C	up	15
36	Track_36	4	0	0	0	0	0	3	31	34	1.333	36	33.094	15.428	0	0.444	1.333	0	0	0.77	14.443	16.54	8.151	16.54	3.632	-0.0872	14-12-2019	B7-15	15°C	down	15
1	Track_1	34	0	0	0	0	0	33	0	33	0.443	1	29.356	73.591	0	0.046	0.133	0	0.033	0.036	9.982	10.712	9.193	10.089	0.436	0.0940376	14-12-2019	B7-15	15°C	up	15
2	Track_2	33	1	1	0	0	0	33	0	33	9.896	2	50.831	70.288	0	0.396	0.557	0	0.423	0.098	5.726	6.708	4.606	5.647	0.555	-0.00235615	14-12-2019	B7-15	15°C	down	15
3	Track_3	11	2	4	0	0	0	15	0	15	8.105	3	34.536	80.991	0	0.183	1.624	0.006	0.023	0.507	4.639	5.119	4.415	4.56	0.216	0.000518693	14-12-2019	B7-15	15°C	up	15
4	Track_4	34	0	0	0	0	0	33	0	33	5.13	4	119.984	27.234	0	0.17	0.248	0	0.167	0.052	10.042	11.618	8.833	10.062	0.693	-0.449841	14-12-2019	B7-15	15°C	down	15
5	Track_5	34	0	0	0	0	0	33	0	33	2.905	5	109.229	57.944	0	0.174	0.354	0	0.161	0.103	7.089	8.427	5.538	7.249	0.855	-0.155641	14-12-2019	B7-15	15°C	down	15
6	Track_6	29	1	5	0	0	0	33	0	33	3.347	6	115.592	71.185	0	0.132	0.333	0	0.109	0.081	5.863	7.609	4.411	5.903	0.825	0.0900989	14-12-2019	B7-15	15°C	up	15
7	Track_7	34	0	0	0	0	0	33	0	33	0.035	7	55.534	81.909	0	0.035	0.111	0	0.026	0.027	5.514	5.682	5.387	5.525	0.072	0.0491517	14-12-2019	B7-15	15°C	up	15
8	Track_8	34	0	0	0	0	0	33	0	33	9.713	8	64.731	35.031	0	0.324	0.509	0	0.34	0.106	7.513	8.986	6.34	7.618	0.771	0.000194652	14-12-2019	B7-15	15°C	up	15
9	Track_9	34	0	0	0	0	0	33	0	33	2.523	9	57.037	62.171	0	0.108	0.165	0	0.116	0.044	8.981	10.159	8.079	9.01	0.41	0.289149	14-12-2019	B7-15	15°C	up	15
10	Track_10	34	0	0	0	0	0	33	0	33	0.007	10	63.827	76.525	0	0.014	0.031	0	0.014	0.008	6.945	7.105	6.751	6.965	0.094	-0.0177484	14-12-2019	B7-15	15°C	down	15
11	Track_11	34	0	0	0	0	0	33	0	33	0.01	11	65.847	74.271	0	0.016	0.057	0	0.013	0.014	6.249	6.453	6.097	6.248	0.096	-5.22536e-05	14-12-2019	B7-15	15°C	down	15
12	Track_12	32	2	1	0	0	0	33	0	33	11.802	12	35.592	80.052	0	0.406	8.972	0	0.041	1.597	4.613	4.936	4.401	4.581	0.131	-5.08785e-05	14-12-2019	B7-15	15°C	down	15
13	Track_13	34	0	0	0	0	0	33	0	33	2.349	13	47.819	37.336	0	0.309	0.609	0	0.306	0.153	9.295	10.448	7.331	9.417	0.654	0.287832	14-12-2019	B7-15	15°C	up	15
14	Track_14	34	0	0	0	0	0	33	0	33	3.335	14	27.968	47.095	0	0.13	0.285	0	0.115	0.08	7.461	8.3	6.553	7.451	0.472	-0.0342209	14-12-2019	B7-15	15°C	down	15
15	Track_15	34	0	0	0	0	0	33	0	33	2.857	15	88.445	49.805	0	0.16	0.368	0	0.145	0.093	10.307	11.394	8.767	10.41	0.608	0.0880321	14-12-2019	B7-15	15°C	up	15
16	Track_16	27	4	2	0	0	0	31	0	31	4.794	16	40.258	36.676	0	0.366	0.645	0.055	0.366	0.18	6.703	7.898	4.819	6.792	0.608	0.0839422	14-12-2019	B7-15	15°C	up	15
17	Track_17	34	0	0	0	0	0	33	0	33	6.11	17	85.417	43.663	0	0.187	0.299	0	0.191	0.054	8.964	10.206	7.049	9.334	0.891	-0.118237	14-12-2019	B7-15	15°C	down	15
18	Track_18	34	0	0	0	0	0	33	0	33	2.754	18	77.689	49.851	0	0.129	0.211	0	0.131	0.041	6.931	8.209	5.951	6.869	0.568	0.0239164	14-12-2019	B7-15	15°C	up	15
19	Track_19	34	0	0	0	0	0	33	0	33	9.121	19	96.364	43.483	0	0.279	0.397	0	0.284	0.066	6.214	7.861	4.405	6.292	0.786	0.0871089	14-12-2019	B7-15	15°C	up	15
20	Track_20	34	0	0	0	0	0	33	0	33	0.464	20	35.189	19.917	0	0.298	0.467	0	0.338	0.124	8.441	9.368	7.172	8.544	0.58	0.0127089	14-12-2019	B7-15	15°C	up	15
21	Track_21	32	2	1	0	0	0	33	0	33	4.865	21	44.221	86.444	0	0.323	0.53	0	0.363	0.134	5.674	6.827	4.458	5.636	0.614	-0.00865286	14-12-2019	B7-15	15°C	down	15
22	Track_22	34	0	0	0	0	0	33	0	33	4.555	22	108.018	43.014	0	0.183	0.342	0	0.175	0.113	8.195	9.337	7.045	8.303	0.624	-0.0387626	14-12-2019	B7-15	15°C	down	15
24	Track_24	34	0	0	0	0	0	33	0	33	9.974	24	112.871	82.134	0	0.335	0.484	0	0.339	0.073	8.433	10.148	6.634	8.585	0.938	0.0780779	14-12-2019	B7-15	15°C	up	15
25	Track_25	34	0	0	0	0	0	33	0	33	11.215	25	98.501	48.396	0	0.344	0.413	0	0.357	0.069	6.673	7.725	6.06	6.633	0.409	-0.00734041	14-12-2019	B7-15	15°C	down	15
26	Track_26	34	0	0	0	0	0	33	0	33	12.585	26	88.375	54.624	0	0.397	0.589	0	0.391	0.111	8.02	9.637	7.048	7.935	0.533	0.00474561	14-12-2019	B7-15	15°C	up	15
27	Track_27	34	0	0	0	0	0	33	0	33	1.408	27	94.769	21.916	0	0.281	0.542	0	0.314	0.135	7.546	9.238	5.708	7.68	0.934	0.0385114	14-12-2019	B7-15	15°C	up	15
28	Track_28	34	0	0	0	0	0	33	0	33	1.308	28	95.426	17.516	0	0.171	0.494	0	0.151	0.094	10.805	11.685	9.72	10.763	0.504	-0.0111872	14-12-2019	B7-15	15°C	down	15
29	Track_29	34	0	0	0	0	0	33	0	33	4.42	29	112.223	76.051	0	0.294	0.557	0	0.288	0.125	9.388	10.289	8.296	9.509	0.581	0.0341355	14-12-2019	B7-15	15°C	up	15
30	Track_30	32	2	1	0	0	0	33	0	33	4.056	30	122.271	63.781	0	0.143	0.28	0	0.127	0.06	5.009	5.813	4.388	5.05	0.412	0.0452359	14-12-2019	B7-15	15°C	up	15
32	Track_32	20	2	2	0	0	0	22	11	33	1.514	32	131.898	18.137	0	0.28	0.749	0	0.246	0.187	10.904	15.128	6.776	11.082	2.6	0.0369825	14-12-2019	B7-15	15°C	up	15
1	Track_1	57	0	0	0	0	0	56	0	56	51.203	1	85.718	46.182	0	0.93	1.476	0.029	1.052	0.427	23.832	26.714	17.369	23.954	1.463	-0.000453526	2019-03-12	B2-15	15°C	down	4
2	Track_2	64	0	0	0	0	0	63	0	63	23.015	2	67.838	56.418	0	0.594	1.047	0	0.608	0.228	26.842	29.346	23.742	26.828	1.177	-0.0510489	2019-03-12	B2-15	15°C	down	4
3	Track_3	64	0	0	0	0	0	63	0	63	9.404	3	20.591	25.119	0	0.167	0.616	0	0.025	0.227	24.062	27.041	17.608	24.19	1.555	-0.352939	2019-03-12	B2-15	15°C	down	4
4	Track_4	64	0	0	0	0	0	63	0	63	8.413	4	96.297	67.015	0	0.169	0.346	0	0.167	0.089	22.258	23.915	19.742	22.372	0.933	0.0481047	2019-03-12	B2-15	15°C	up	4
5	Track_5	11	0	0	0	0	0	10	0	10	6.799	5	42.476	18.605	0	0.688	0.955	0.369	0.764	0.205	21.725	26.976	16.944	21.093	3.094	0.0572485	2019-03-12	B2-15	15°C	up	4
6	Track_6	64	0	0	0	0	0	63	0	63	3.918	6	55.914	31.795	0	0.103	0.2	0	0.098	0.052	27.056	28.668	25.245	27.14	0.704	-0.0881364	2019-03-12	B2-15	15°C	down	4
7	Track_7	53	0	0	0	0	0	52	0	52	16.618	7	111.122	36.673	0	0.392	0.873	0.158	0.373	0.167	25.458	28.895	20.923	25.372	1.44	-0.048631	2019-03-12	B2-15	15°C	down	4
8	Track_8	7	0	0	0	0	0	6	0	6	3.742	8	115.874	53.09	0	0.629	0.707	0.54	0.622	0.056	27.129	30.112	25.172	27.013	1.437	0.120258	2019-03-12	B2-15	15°C	up	4
9	Track_9	64	0	0	0	0	0	63	0	63	19.55	9	66.47	71.54	0	0.459	0.83	0	0.472	0.175	19.463	22.259	16.041	19.73	1.507	0.416357	2019-03-12	B2-15	15°C	up	4
10	Track_10	64	0	0	0	0	0	63	0	63	7.792	10	112.417	35.194	0	0.408	1.125	0	0.358	0.263	24.232	28.502	19.751	24.107	1.853	-0.262447	2019-03-12	B2-15	15°C	down	4
11	Track_11	63	1	1	0	0	0	63	0	63	20.981	11	108.135	40.697	0	0.566	1.355	0	0.26	0.5	27.919	32.606	24.371	27.258	2.267	-0.0644456	2019-03-12	B2-15	15°C	down	4
12	Track_12	26	1	1	0	0	0	26	0	26	2.345	12	115.941	41.798	0	0.123	0.93	0.03	0.062	0.198	27.499	34.176	22.459	27.486	2.013	0.0533779	2019-03-12	B2-15	15°C	up	4
13	Track_13	21	0	0	0	0	0	20	0	20	26.444	13	104.4	38.861	0	1.325	1.564	0.923	1.382	0.168	29.675	31.198	25.727	29.793	1.219	0.0519195	2019-03-12	B2-15	15°C	up	4
14	Track_14	64	0	0	0	0	0	63	0	63	5.353	14	19.446	77.14	0	0.086	0.14	0	0.09	0.031	37.662	39.871	35.033	37.854	1.111	0.266652	2019-03-12	B2-15	15°C	up	4
15	Track_15	64	0	0	0	0	0	63	0	63	19.611	15	22.768	69.112	0	0.327	0.918	0	0.036	0.393	27.258	34.291	15.994	28.616	4.462	-0.090538	2019-03-12	B2-15	15°C	down	4
16	Track_16	2	0	0	0	0	0	1	5	6	0.078	16	18.213	93.042	0	0.078	0.078	0.078	0.078	NA	15.689	15.759	15.619	15.759	0.07	-0.139579	2019-03-12	B2-15	15°C	down	4
17	Track_17	29	2	4	0	0	0	34	3	37	9.545	17	25.076	30.023	0	0.355	0.708	0.038	0.336	0.231	17.804	21.796	15.596	17.307	1.679	-0.076	2019-03-12	B2-15	15°C	down	4
18	Track_18	3	0	0	0	0	0	2	3	5	0.013	18	22.269	19.398	0	0.031	0.037	0.026	0.037	0.008	17.512	18.639	16.269	17.628	0.971	0.0272439	2019-03-12	B2-15	15°C	up	4
19	Track_19	50	0	0	0	0	0	49	14	63	3.245	19	18.279	90.366	0	0.069	0.165	0	0.067	0.045	18.201	21.048	15.83	17.989	1.395	-0.001	2019-03-12	B2-15	15°C	down	4
20	Track_20	17	1	1	0	0	0	17	15	32	12.287	20	26.005	19.422	0	0.764	1.146	0.048	0.821	0.291	21.807	29.101	15.643	22.598	4.764	-0.0673703	2019-03-12	B2-15	15°C	down	4
21	Track_21	3	0	0	0	0	0	2	26	28	0	21	17.579	67.451	0	0	0	0	0	0	15.908	16.144	15.681	15.898	0.189	0.179201	2019-03-12	B2-15	15°C	up	4
22	Track_22	4	0	0	0	0	0	3	48	51	0.464	22	21.511	31.973	0	0.156	0.167	0.138	0.162	0.015	17.875	19.161	15.977	18.322	1.171	-1.2307e-14	2019-03-12	B2-15	15°C	down	4
23	Track_23	16	0	0	0	0	0	15	48	63	6.577	23	114.25	73.505	0	0.45	0.761	0	0.475	0.205	28.301	30.429	24.029	28.366	1.438	0.1558	2019-03-12	B2-15	15°C	up	4
24	Track_24	5	0	0	0	0	0	4	59	63	0.136	24	19.282	33.839	0	0.041	0.13	0	0.033	0.062	17.748	17.952	17.547	17.747	0.128	0.248419	2019-03-12	B2-15	15°C	up	4
1	Track_1	40	0	0	0	0	0	39	0	39	6.863	1	121.274	49.149	0	0.215	0.287	0	0.225	0.054	26.378	31.555	22.023	26.28	2.623	-0.0170467	2019-03-12	B2-15	15°C	down	4
2	Track_2	33	3	4	0	0	0	39	0	39	8.517	2	96.459	55.71	0	0.257	0.553	0	0.251	0.167	19.964	21.509	18.586	19.916	0.711	0.0226366	2019-03-12	B2-15	15°C	up	4
3	Track_3	40	0	0	0	0	0	39	0	39	4.573	3	20.776	39.295	0	0.126	0.292	0	0.121	0.083	24.745	26.927	22.275	24.942	0.972	-0.104329	2019-03-12	B2-15	15°C	down	4
4	Track_4	39	1	1	0	0	0	39	0	39	9.302	4	110.664	66.173	0	0.255	0.354	0	0.272	0.074	20.298	21.832	18.73	20.141	0.748	0.119321	2019-03-12	B2-15	15°C	up	4
5	Track_5	40	0	0	0	0	0	39	0	39	21.656	5	100.173	44.744	0	0.558	0.635	0	0.575	0.097	24.018	26.848	22.24	23.877	1.159	-0.0168323	2019-03-12	B2-15	15°C	down	4
6	Track_6	40	0	0	0	0	0	39	0	39	0.09	6	18.983	65.343	0	0.007	0.026	0	0.005	0.007	28.235	29.208	26.91	28.479	0.627	0.0068878	2019-03-12	B2-15	15°C	up	4
7	Track_7	40	0	0	0	0	0	39	0	39	0.016	7	17.911	64.699	0	0.008	0.033	0	0.004	0.008	24.538	25.685	23.732	24.534	0.409	-0.002447	2019-03-12	B2-15	15°C	down	4
8	Track_8	40	0	0	0	0	0	39	0	39	1.489	8	19.144	71.161	0	0.04	0.067	0	0.042	0.02	33.745	35.187	31.438	33.888	0.893	0.000237711	2019-03-12	B2-15	15°C	up	4
9	Track_9	40	0	0	0	0	0	39	0	39	11.919	9	91.439	74.075	0	0.317	0.435	0	0.318	0.091	26.417	28.778	24.579	26.508	0.953	-0.0402941	2019-03-12	B2-15	15°C	down	4
10	Track_10	40	0	0	0	0	0	39	0	39	16.63	10	102.566	38.164	0	0.429	0.509	0	0.444	0.078	24.061	25.656	22.464	24.165	0.67	-0.0577074	2019-03-12	B2-15	15°C	down	4
11	Track_11	40	0	0	0	0	0	39	0	39	12.723	11	92.017	38.36	0	0.327	0.366	0	0.335	0.056	25.212	26.845	22.583	25.28	0.912	-0.0122264	2019-03-12	B2-15	15°C	down	4
12	Track_12	40	0	0	0	0	0	39	0	39	0.263	12	18.582	25.803	0	0.011	0.032	0	0.01	0.007	23.015	24.548	21.685	22.758	0.847	-0.0367561	2019-03-12	B2-15	15°C	down	4
13	Track_13	40	0	0	0	0	0	39	0	39	3.423	13	51.043	28.626	0	0.118	0.158	0	0.126	0.028	26.147	27.832	23.752	26.468	1.049	0.00673114	2019-03-12	B2-15	15°C	up	4
14	Track_14	40	0	0	0	0	0	39	0	39	8.751	14	116.84	29.896	0	0.285	0.55	0	0.245	0.157	27.877	30.348	24.892	28.182	1.433	0.0212145	2019-03-12	B2-15	15°C	up	4
15	Track_15	40	0	0	0	0	0	39	0	39	10.485	15	96.793	36.749	0	0.27	0.513	0	0.264	0.14	27.028	28.97	24.727	27.133	1.056	-0.184107	2019-03-12	B2-15	15°C	down	4
16	Track_16	37	0	0	0	0	0	36	3	39	17.264	16	81.877	30.095	0	0.48	0.577	0	0.496	0.099	20.554	22.17	18.957	20.755	0.846	-0.0713996	2019-03-12	B2-15	15°C	down	4
17	Track_17	3	0	0	0	0	0	2	5	7	0.009	17	125.978	96.474	0	0.024	0.026	0.021	0.026	0.003	22.138	22.445	21.917	22.053	0.224	-0.0118959	2019-03-12	B2-15	15°C	down	4
18	Track_18	2	0	0	0	0	0	1	10	11	0.068	18	20.894	87.888	0	0.068	0.068	0.068	0.068	NA	18.687	18.826	18.548	18.826	0.139	-0.0035	2019-03-12	B2-15	15°C	down	4
19	Track_19	27	0	0	0	0	0	26	13	39	9.955	19	28.106	31.798	0	0.388	0.598	0	0.402	0.134	20.398	21.865	19.15	20.382	0.8	-0.048	2019-03-12	B2-15	15°C	down	4
20	Track_20	20	0	0	0	0	0	19	20	39	0.972	20	20.781	86.943	0	0.054	0.11	0	0.058	0.038	20.529	22.127	18.895	20.521	0.826	0.298469	2019-03-12	B2-15	15°C	up	4
21	Track_21	9	0	0	0	0	0	8	31	39	0.009	21	116.638	35.423	0	0.009	0.021	0	0.008	0.008	18.986	19.473	18.527	18.81	0.353	-0.0536068	2019-03-12	B2-15	15°C	down	4
22	Track_22	2	0	0	0	0	0	1	33	34	0.013	22	125.994	96.473	0	0.013	0.013	0.013	0.013	NA	21.884	21.907	21.861	21.907	0.023	-0.00108333	2019-03-12	B2-15	15°C	down	4
1	Track_1	57	0	0	0	0	0	56	0	56	0.225	1	16.488	15.714	0	0.013	0.279	0	0.007	0.037	26.206	26.679	25.677	26.231	0.258	0.0612069	2019-03-12	B2-15	15°C	up	4
2	Track_2	57	0	0	0	0	0	56	0	56	47.967	2	77.103	13.742	0	0.858	1.198	0	0.879	0.24	24.438	27.577	21.485	24.16	1.468	0.000764649	2019-03-12	B2-15	15°C	up	4
3	Track_3	57	0	0	0	0	0	56	0	56	22.278	3	70.214	41.871	0	0.507	0.958	0	0.558	0.243	23.12	24.82	21.569	23.271	0.81	0.0623887	2019-03-12	B2-15	15°C	up	4
4	Track_4	43	2	2	0	0	0	45	0	45	10.084	4	25.271	37.874	0	0.271	0.461	0.074	0.311	0.108	19.77	23.719	16.402	19.918	1.997	0.170306	2019-03-12	B2-15	15°C	up	4
5	Track_5	31	9	4	0	0	0	50	0	50	0.045	5	14.282	12.739	0	0.04	0.185	0.001	0.03	0.041	16.547	17.089	16.306	16.524	0.163	0.195246	2019-03-12	B2-15	15°C	up	4
6	Track_6	57	0	0	0	0	0	56	0	56	30.026	6	98.566	88.879	0	0.543	0.763	0	0.542	0.137	22.654	24.936	19.891	22.719	1.098	0.000218262	2019-03-12	B2-15	15°C	up	4
7	Track_7	57	0	0	0	0	0	56	0	56	4.273	7	60.732	79.697	0	0.146	0.443	0	0.12	0.105	22.583	26.138	19.824	22.306	1.486	-0.00170541	2019-03-12	B2-15	15°C	down	4
8	Track_8	2	0	0	0	0	0	1	0	1	0.428	8	80.404	87.167	0	0.428	0.428	0.428	0.428	NA	21.682	21.979	21.385	21.979	0.297	-0.00860902	2019-03-12	B2-15	15°C	down	4
9	Track_9	57	0	0	0	0	0	56	0	56	21.547	9	103.417	80.864	0	0.408	0.605	0	0.432	0.125	19.953	22.565	16.594	20.133	1.257	0.01	2019-03-12	B2-15	15°C	up	4
10	Track_10	13	0	0	0	0	0	12	0	12	10.454	10	30.425	68.825	0	0.871	0.916	0.839	0.873	0.02	18.211	20.09	16.537	18.249	1.039	0.0860998	2019-03-12	B2-15	15°C	up	4
11	Track_11	57	0	0	0	0	0	56	0	56	10.971	11	111.657	24.601	0	0.3	0.459	0	0.32	0.134	27.015	28.97	24.732	27.083	1.029	-0.0214835	2019-03-12	B2-15	15°C	down	4
12	Track_12	57	0	0	0	0	0	56	0	56	12.769	12	79.044	42.15	0	0.317	0.684	0	0.273	0.182	20.926	23.356	17.755	21.066	1.153	-0.199873	2019-03-12	B2-15	15°C	down	4
13	Track_13	57	0	0	0	0	0	56	0	56	6.781	13	64.347	50.531	0	0.17	0.373	0	0.164	0.091	21.945	23.669	20.296	21.96	0.902	0.085487	2019-03-12	B2-15	15°C	up	4
14	Track_14	57	0	0	0	0	0	56	0	56	0.403	14	19.934	35.981	0	0.024	0.247	0	0.02	0.032	19.309	23.198	16.662	18.999	1.687	0.0314715	2019-03-12	B2-15	15°C	up	4
15	Track_15	57	0	0	0	0	0	56	0	56	2.329	15	16.72	43.258	0	0.052	0.232	0	0.052	0.037	29.987	31.379	28.204	29.925	0.743	0.0127368	2019-03-12	B2-15	15°C	up	4
16	Track_16	57	0	0	0	0	0	56	0	56	13.232	16	37.45	18.228	0	0.289	0.513	0	0.279	0.096	21.044	23.382	18.983	21.109	0.952	0.0457077	2019-03-12	B2-15	15°C	up	4
17	Track_17	56	0	0	0	0	0	55	1	56	0.277	17	114.665	14.257	0	0.015	0.216	0	0.009	0.029	19.639	20.356	18.341	19.711	0.394	-0.0274501	2019-03-12	B2-15	15°C	down	4
18	Track_18	56	0	0	0	0	0	55	1	56	0.267	18	116.362	14.424	0	0.014	0.208	0	0.008	0.028	19.906	20.667	19.012	19.946	0.416	-0.000507109	2019-03-12	B2-15	15°C	down	4
19	Track_19	8	0	0	0	0	0	7	1	8	0.11	19	14.458	48.073	0	0.028	0.049	0.005	0.029	0.013	17.692	19.301	16.859	17.246	0.827	-0.000597573	2019-03-12	B2-15	15°C	down	4
20	Track_20	56	0	0	0	0	0	55	1	56	0.197	20	125.52	86.118	0	0.01	0.149	0	0.006	0.02	20.504	21.003	19.493	20.516	0.286	-0.0158095	2019-03-12	B2-15	15°C	down	4
21	Track_21	44	0	0	0	0	0	43	13	56	5.979	21	30.568	62.256	0	0.147	0.219	0	0.161	0.051	19.135	21.174	17.142	19.259	1.081	-0.000462543	2019-03-12	B2-15	15°C	down	4
22	Track_22	19	2	3	0	0	0	23	18	41	0.939	22	20.189	68.427	0	0.059	0.498	0.002	0.012	0.13	17.481	19.244	16.312	17.122	1.048	0.0136992	2019-03-12	B2-15	15°C	up	4
23	Track_23	26	0	0	0	0	0	25	31	56	14.524	23	54.874	87.662	0	0.585	0.665	0	0.613	0.126	23.044	24.614	21.618	23.18	0.809	-0.00319434	2019-03-12	B2-15	15°C	down	4
24	Track_24	4	0	0	0	0	0	3	33	36	0.709	24	96.411	84.025	0	0.239	0.266	0.205	0.246	0.031	17.107	18.111	16.325	17.376	0.695	-0.0167371	2019-03-12	B2-15	15°C	down	4
25	Track_25	2	0	0	0	0	0	1	41	42	0.264	25	94.712	84.543	0	0.264	0.264	0.264	0.264	NA	16.673	16.955	16.392	16.955	0.281	-0.1332	2019-03-12	B2-15	15°C	down	4
26	Track_26	11	1	1	0	0	0	11	45	56	2.124	26	23.064	8.523	0	0.191	0.387	0	0.19	0.122	17.489	18.664	16.45	17.065	0.828	-0.082	2019-03-12	B2-15	15°C	down	4
27	Track_27	11	0	0	0	0	0	10	46	56	0.234	27	14.893	49.319	0	0.045	0.186	0	0.031	0.054	19.91	21.077	17.643	20.14	0.936	0.217977	2019-03-12	B2-15	15°C	up	4
28	Track_28	3	0	0	0	0	0	2	51	53	0.899	28	90.65	84.669	0	0.451	0.457	0.444	0.457	0.009	17.202	17.882	16.849	16.874	0.481	0.00996364	2019-03-12	B2-15	15°C	up	4
29	Track_29	6	0	0	0	0	0	5	51	56	0.171	29	23.195	43.729	0	0.082	0.169	0	0.072	0.064	19.186	19.981	16.386	19.804	1.279	-0.084	2019-03-12	B2-15	15°C	down	4
30	Track_30	4	0	0	0	0	0	3	53	56	0.249	30	20.17	68.265	0	0.091	0.247	0	0.027	0.136	17.421	18.026	16.774	18.026	0.606	0.0226857	2019-03-12	B2-15	15°C	up	4
31	Track_31	2	0	0	0	0	0	1	55	56	0	31	11.667	76.296	0	0	0	0	0	NA	19.445	19.445	19.445	19.445	0	-0.0901	2019-03-12	B2-15	15°C	down	4
1	Track_1	64	0	0	0	0	0	63	0	63	2.477	1	9.993	58.015	0	0.046	0.636	0	0.007	0.135	24.128	26.504	21.664	24.192	1.112	-0.121758	2019-03-12	B2	13°C	down	4
2	Track_2	25	0	0	0	0	0	24	0	24	0.016	2	12.843	38.196	0	0.007	0.021	0.0006928	0.006	0.005	16.468	16.889	15.997	16.497	0.22	0.00111538	2019-03-12	B2	13°C	up	4
3	Track_3	43	0	0	0	0	0	42	0	42	0.59	3	13.422	34.63	0	0.056	0.19	0.007	0.047	0.038	23.082	24.928	21.202	23.177	0.871	-7.61538e-05	2019-03-12	B2	13°C	down	4
4	Track_4	64	0	0	0	0	0	63	0	63	1.339	4	9.758	77.289	0	0.043	0.096	0	0.037	0.025	22.682	24.284	20.104	22.768	1.029	-0.0060444	2019-03-12	B2	13°C	down	4
5	Track_5	64	0	0	0	0	0	63	0	63	3.861	5	7.438	53.631	0	0.086	0.238	0	0.071	0.056	18.497	21.94	15.377	18.749	1.914	-0.0174723	2019-03-12	B2	13°C	down	4
6	Track_6	64	0	0	0	0	0	63	0	63	0.166	6	7.525	62.312	0	0.008	0.036	0	0.006	0.006	26.972	28.047	25.172	27.328	0.805	-0.059186	2019-03-12	B2	13°C	down	4
7	Track_7	55	5	3	0	0	0	63	0	63	0.048	7	126.499	51.197	0	0.012	0.038	0	0.01	0.009	15.283	15.673	15.045	15.27	0.132	0.00281628	2019-03-12	B2	13°C	up	4
8	Track_8	25	2	1	0	0	0	26	0	26	1.582	8	12.531	47.772	0	0.082	0.98	0.001	0.007	0.249	23.03	24.588	16.606	24.204	2.713	-1.97447e-05	2019-03-12	B2	13°C	down	4
9	Track_9	64	0	0	0	0	0	63	0	63	7.64	9	11.938	77.557	0	0.149	0.407	0	0.104	0.129	20.208	22.886	15.035	20.819	1.711	0.00277149	2019-03-12	B2	13°C	up	4
10	Track_10	29	0	0	0	0	0	28	0	28	0.037	10	12.996	50.983	0	0.34	4.539	0.002	0.019	1.183	25.26	26.589	15.802	25.569	1.843	-0.0288632	2019-03-12	B2	13°C	down	4
11	Track_11	64	0	0	0	0	0	63	0	63	0.012	11	11.241	50.904	0	0.017	0.047	0	0.016	0.009	18.107	19.244	17.463	18.097	0.437	-0.00137685	2019-03-12	B2	13°C	down	4
12	Track_12	64	0	0	0	0	0	63	0	63	4.027	12	73.634	63.163	0	0.074	0.161	0	0.071	0.04	26.771	28.799	24.673	26.867	0.991	-0.00130018	2019-03-12	B2	13°C	down	4
13	Track_13	64	0	0	0	0	0	63	0	63	0.111	13	8.648	42.833	0	0.008	0.044	0	0.006	0.007	24.525	24.997	23.722	24.619	0.296	0.0153462	2019-03-12	B2	13°C	up	4
14	Track_14	64	0	0	0	0	0	63	0	63	0.057	14	10.444	73.685	0	0.007	0.027	0	0.005	0.006	21.514	22.013	20.969	21.525	0.205	-0.0018438	2019-03-12	B2	13°C	down	4
15	Track_15	64	0	0	0	0	0	63	0	63	7.844	15	60.537	19.11	0	0.182	0.656	0	0.173	0.113	22.778	25.675	20.42	22.53	1.187	0.000537752	2019-03-12	B2	13°C	up	4
16	Track_16	64	0	0	0	0	0	63	0	63	20.492	16	41.312	35.46	0	0.379	0.793	0	0.357	0.105	22.806	25.614	19.85	22.749	1.232	-0.0317111	2019-03-12	B2	13°C	down	4
17	Track_17	64	0	0	0	0	0	63	0	63	20.471	17	89.202	56.406	0	0.349	0.737	0	0.306	0.165	26.834	29.009	23.369	26.954	1.103	0.159212	2019-03-12	B2	13°C	up	4
18	Track_18	64	0	0	0	0	0	63	0	63	37.387	18	82.441	67.933	0	0.596	0.757	0	0.627	0.129	27.892	30.303	26.009	27.811	1.026	0.309275	2019-03-12	B2	13°C	up	4
19	Track_19	14	0	0	0	0	0	13	0	13	0.137	19	8.225	77.596	0	0.038	0.064	0.003	0.039	0.02	17.016	18.52	15.384	17.087	0.883	0.0851062	2019-03-12	B2	13°C	up	4
20	Track_20	63	1	1	0	0	0	63	0	63	14.392	20	96.072	23.773	0	0.251	0.548	0	0.22	0.156	27.084	28.921	23.167	27.39	1.264	7.25275e-05	2019-03-12	B2	13°C	up	4
21	Track_21	64	0	0	0	0	0	63	0	63	0.061	21	12.968	19.398	0	0.008	0.029	0	0.007	0.005	16.031	16.935	15.334	15.956	0.448	-0.14885	2019-03-12	B2	13°C	down	4
22	Track_22	58	3	3	0	0	0	63	0	63	8.646	22	8.658	77.112	0	0.201	1.65	0	0.067	0.313	16.599	20.478	15.109	16.333	1.153	0.000847253	2019-03-12	B2	13°C	up	4
23	Track_23	64	0	0	0	0	0	63	0	63	0.097	23	12.743	42.345	0	0.007	0.038	0	0.005	0.007	20.872	21.558	20.26	20.894	0.314	-0.00724126	2019-03-12	B2	13°C	down	4
24	Track_24	60	1	4	0	0	0	63	0	63	8.226	24	13.736	37.318	0	0.164	0.38	0	0.21	0.127	21.213	24.178	16.831	21.041	1.598	-0.00160291	2019-03-12	B2	13°C	down	4
25	Track_25	64	0	0	0	0	0	63	0	63	0.416	25	6.835	59.745	0	0.011	0.049	0	0.007	0.011	19.876	20.883	18.734	19.812	0.418	0.00855301	2019-03-12	B2	13°C	up	4
26	Track_26	60	1	4	0	0	0	63	0	63	3.129	26	9.845	47.315	0	0.023	0.519	0	0.009	0.077	21.988	23.718	18.734	22.111	1.215	-0.00447349	2019-03-12	B2	13°C	down	4
27	Track_27	9	1	1	0	0	0	9	0	9	2.249	27	17.602	54.271	0	0.243	0.312	0.191	0.242	0.044	15.726	16.619	15.041	15.622	0.501	-0.00215716	2019-03-12	B2	13°C	down	4
28	Track_28	61	1	3	0	0	0	63	0	63	2.921	28	11.262	47.771	0	0.04	0.705	0	0.005	0.142	17.289	20.784	15.078	17.229	0.697	-0.242007	2019-03-12	B2	13°C	down	4
29	Track_29	61	0	0	0	0	0	60	3	63	0.631	29	8.252	58.013	0	0.018	0.439	0	0.006	0.061	19.121	20.561	17.813	18.945	0.726	0.00200076	2019-03-12	B2	13°C	up	4
30	Track_30	58	2	1	0	0	0	59	4	63	23.936	30	27.275	84.988	0	0.413	0.572	0	0.481	0.136	21.905	24.6	16.257	22.063	1.213	0.00116362	2019-03-12	B2	13°C	up	4
31	Track_31	52	0	0	0	0	0	51	6	57	0.306	31	8.163	47.295	0	0.014	0.296	0.0004688	0.007	0.041	16.643	17.755	15.189	16.697	0.569	-0.108084	2019-03-12	B2	13°C	down	4
32	Track_32	23	0	0	0	0	0	22	15	37	0.037	32	108.422	32.902	0	0.009	0.035	0.001	0.007	0.008	16.818	18.571	15.347	16.697	0.733	0.000208059	2019-03-12	B2	13°C	up	4
33	Track_33	35	4	4	0	0	0	42	19	61	4.037	33	13.631	50.493	0	0.396	4.665	0.003	0.019	1.072	23.596	27.148	15.028	25.179	4.053	-0.00117292	2019-03-12	B2	13°C	down	4
34	Track_34	4	1	3	0	0	0	6	20	26	0.251	34	10.378	89.676	0	0.061	0.095	0.041	0.046	0.03	18.594	19.96	17.344	18.753	0.94	0.00139854	2019-03-12	B2	13°C	up	4
35	Track_35	16	0	0	0	0	0	15	34	49	0.022	35	12.785	47.788	0	0.006	0.013	0.000311	0.004	0.004	24.76	25.096	24.4	24.889	0.244	0.00226923	2019-03-12	B2	13°C	up	4
36	Track_36	31	0	0	0	0	0	30	33	63	0.004	36	12.864	38.193	0	0.005	0.015	0	0.005	0.004	15.977	16.305	15.157	16.024	0.217	-0.000580882	2019-03-12	B2	13°C	down	4
37	Track_37	6	0	0	0	0	0	5	38	43	0.44	37	16.881	48.404	0	0.089	0.135	0.055	0.1	0.034	16.494	17.403	15.322	16.902	0.846	0.000381452	2019-03-12	B2	13°C	up	4
38	Track_38	23	0	0	0	0	0	22	41	63	0.302	38	9.033	37.236	0	0.024	0.059	0	0.023	0.018	16.814	18.294	15.555	16.717	0.955	-0.0794571	2019-03-12	B2	13°C	down	4
39	Track_39	2	0	0	0	0	0	1	46	47	0.044	39	9.968	88.946	0	0.044	0.044	0.044	0.044	NA	18.853	18.993	18.713	18.993	0.14	-0.0162974	2019-03-12	B2	13°C	down	4
40	Track_40	9	0	0	0	0	0	8	55	63	0.175	40	9.989	33.649	0	0.031	0.095	0	0.022	0.03	16.194	16.969	15.017	16.266	0.641	-0.038	2019-03-12	B2	13°C	down	4
1	Track_1	55	1	1	0	0	0	55	0	55	10.889	1	26.735	40.06	0	0.234	0.509	0	0.209	0.156	20.945	22.506	18.554	21.094	0.991	-0.212719	2019-03-12	B2	13°C	down	4
2	Track_2	56	0	0	0	0	0	55	0	55	3.923	2	65.515	58.128	0	0.105	0.273	0	0.089	0.073	20.873	23.084	18.951	20.78	1.075	0.14621	2019-03-12	B2	13°C	up	4
3	Track_3	45	4	4	0	0	0	55	0	55	20.217	3	21.545	89.206	0	0.357	0.57	0	0.346	0.088	19.992	21.867	18.303	20.148	1.017	0.0584767	2019-03-12	B2	13°C	up	4
4	Track_4	6	0	0	0	0	0	5	0	5	3.284	4	9.019	63.727	0	0.657	0.709	0.567	0.675	0.055	21.554	23.324	18.984	22.37	1.443	-0.0828604	2019-03-12	B2	13°C	down	4
5	Track_5	56	0	0	0	0	0	55	0	55	0.056	5	11.833	73.375	0	0.015	0.028	0	0.015	0.007	21.358	22.374	20.302	21.4	0.543	0.0657429	2019-03-12	B2	13°C	up	4
6	Track_6	48	1	1	0	0	0	48	0	48	19.876	6	26.452	38.979	0	0.427	0.697	0.171	0.424	0.175	20.515	22.25	18.419	20.494	1.019	-0.00108339	2019-03-12	B2	13°C	down	4
7	Track_7	38	0	0	0	0	0	37	0	37	17.685	7	23.412	92.786	0	0.482	0.654	0.321	0.501	0.076	21.367	23.454	18.256	21.438	0.952	0.273382	2019-03-12	B2	13°C	up	4
8	Track_8	51	2	3	0	0	0	55	0	55	30.709	8	22.699	26.33	0	0.716	3.158	0	0.67	0.565	21.206	25.034	18.257	21.159	1.662	-0.0214523	2019-03-12	B2	13°C	down	4
9	Track_9	56	0	0	0	0	0	55	0	55	0.069	9	13.435	73.376	0	0.016	0.035	0	0.015	0.008	28.365	29.817	26.518	28.406	0.947	0.356975	2019-03-12	B2	13°C	up	4
10	Track_10	56	0	0	0	0	0	55	0	55	1.362	10	38.505	60.64	0	0.034	0.068	0	0.035	0.019	21.617	22.738	20.493	21.672	0.552	-0.00112567	2019-03-12	B2	13°C	down	4
11	Track_11	56	0	0	0	0	0	55	0	55	4.007	11	25.328	80.396	0	0.14	0.258	0	0.144	0.063	22.094	24.306	20.165	22.077	0.779	0.0156763	2019-03-12	B2	13°C	up	4
12	Track_12	56	0	0	0	0	0	55	0	55	10.286	12	10.718	49.781	0	0.2	0.424	0	0.231	0.141	21.918	27.667	18.4	21.091	2.215	-0.0706659	2019-03-12	B2	13°C	down	4
13	Track_13	53	2	2	0	0	0	55	0	55	3.718	13	30.917	30.583	0	0.09	0.165	0	0.089	0.036	19.455	20.614	18.315	19.46	0.565	0.104075	2019-03-12	B2	13°C	up	4
14	Track_14	56	0	0	0	0	0	55	0	55	10.418	14	12.361	28.115	0	0.446	2.904	0	0.192	0.751	21.665	28.156	18.262	21.705	1.818	0.00122768	2019-03-12	B2	13°C	up	4
15	Track_15	56	0	0	0	0	0	55	0	55	3.209	15	17.485	34.116	0	0.091	0.149	0	0.093	0.035	27.227	29.5	25.25	27.192	0.916	0.198326	2019-03-12	B2	13°C	up	4
16	Track_16	56	0	0	0	0	0	55	0	55	0.012	16	128.731	54.264	0	0.009	0.023	0	0.009	0.005	22.146	22.464	21.822	22.149	0.134	0.0397611	2019-03-12	B2	13°C	up	4
17	Track_17	56	0	0	0	0	0	55	0	55	9.715	17	15.003	44.834	0	0.185	0.635	0	0.022	0.254	25.155	28.941	21.701	25.433	1.41	-2.27273e-05	2019-03-12	B2	13°C	down	4
18	Track_18	56	0	0	0	0	0	55	0	55	0.18	18	13.403	39.862	0	0.009	0.034	0	0.007	0.007	24.226	24.906	23.212	24.312	0.405	0.0298564	2019-03-12	B2	13°C	up	4
19	Track_19	56	0	0	0	0	0	55	0	55	6.878	19	17.978	77.852	0	0.143	0.359	0	0.11	0.089	22.976	25.403	21.295	22.806	0.996	0.00353401	2019-03-12	B2	13°C	up	4
20	Track_20	37	1	1	0	0	0	37	0	37	4.03	20	8.471	40.9	0	0.116	0.683	0.0005722	0.01	0.237	19.512	24.288	18.312	19.099	1.488	-0.105948	2019-03-12	B2	13°C	down	4
21	Track_21	56	0	0	0	0	0	55	0	55	0.128	21	12.908	42.28	0	0.009	0.039	0	0.007	0.007	26.328	27.577	24.261	26.579	0.826	0.011795	2019-03-12	B2	13°C	up	4
22	Track_22	56	0	0	0	0	0	55	0	55	0.132	22	11.291	42.269	0	0.009	0.034	0	0.008	0.007	21.103	22.143	19.659	21.226	0.584	0.00338701	2019-03-12	B2	13°C	up	4
23	Track_23	56	0	0	0	0	0	55	0	55	10.511	23	59.429	59.669	0	0.21	0.381	0	0.202	0.092	28.664	30.542	25.554	28.825	1.104	0.00346456	2019-03-12	B2	13°C	up	4
24	Track_24	56	0	0	0	0	0	55	0	55	2.909	24	25.397	75.831	0	0.113	0.279	0	0.091	0.055	19.913	20.789	18.374	19.953	0.544	0.0785031	2019-03-12	B2	13°C	up	4
25	Track_25	43	7	3	0	0	0	54	1	55	3.648	25	13.924	28.646	0	0.822	3.757	0	0.056	1.361	18.663	23.263	18.254	18.403	0.844	-0.0444123	2019-03-12	B2	13°C	down	4
26	Track_26	56	0	0	0	0	0	55	0	55	10.846	26	120.508	63.44	0	0.199	0.297	0	0.208	0.056	31.605	35.133	28.035	31.491	1.719	-0.0433641	2019-03-12	B2	13°C	down	4
27	Track_27	51	2	3	0	0	0	55	0	55	0.033	27	12.918	77.767	0	0.014	0.072	0	0.008	0.017	24.882	29.849	21.473	24.845	1.432	-0.198811	2019-03-12	B2	13°C	down	4
28	Track_28	56	0	0	0	0	0	55	0	55	0.099	28	8.299	78.621	0	0.012	0.043	0	0.009	0.011	29.774	33.71	26.64	29.878	1.175	-9.40161e-05	2019-03-12	B2	13°C	down	4
29	Track_29	56	0	0	0	0	0	55	0	55	31.214	29	84.142	16.472	0	0.57	0.755	0	0.566	0.098	27.367	29.949	22.239	27.744	1.838	-0.00166459	2019-03-12	B2	13°C	down	4
30	Track_30	56	0	0	0	0	0	55	0	55	0.012	30	8.299	72.393	0	0.007	0.026	0	0.005	0.006	29.261	30.028	28.243	29.308	0.372	-0.080201	2019-03-12	B2	13°C	down	4
31	Track_31	5	0	0	0	0	0	4	0	4	0.04	31	9.538	92.808	0	0.011	0.016	0.007	0.011	0.004	18.613	18.906	18.385	18.651	0.189	-0.000111996	2019-03-12	B2	13°C	down	4
32	Track_32	56	0	0	0	0	0	55	0	55	12.254	32	29.391	53.178	0	0.255	0.331	0	0.257	0.042	20.844	22.792	18.443	20.992	1.006	-0.01	2019-03-12	B2	13°C	down	4
33	Track_33	56	0	0	0	0	0	55	0	55	8.639	33	23.543	60.257	0	0.245	0.339	0	0.247	0.058	22.467	24.257	20.355	22.497	0.842	0.121341	2019-03-12	B2	13°C	up	4
34	Track_34	56	0	0	0	0	0	55	0	55	18.428	34	74.364	54.326	0	0.338	0.533	0	0.332	0.079	24.292	26.347	22.217	24.353	0.924	0.139787	2019-03-12	B2	13°C	up	4
35	Track_35	48	4	4	0	0	0	55	0	55	17.088	35	17.1	43.53	0	0.294	0.467	0	0.387	0.173	20.809	24.37	18.283	20.783	1.503	-0.0210018	2019-03-12	B2	13°C	down	4
36	Track_36	11	1	2	0	0	0	12	4	16	0.799	36	13.204	16.885	0	0.099	0.374	0.013	0.052	0.108	18.925	20.023	18.331	18.841	0.488	0.19069	2019-03-12	B2	13°C	up	4
37	Track_37	11	0	0	0	0	0	10	6	16	5.458	37	18.952	93	0	0.546	0.589	0.513	0.546	0.03	20.067	21.399	18.776	20.228	0.85	-0.0538875	2019-03-12	B2	13°C	down	4
38	Track_38	4	1	2	0	0	0	5	9	14	3.639	38	29.098	21.132	0	0.725	0.738	0.704	0.733	0.018	18.819	19.254	18.425	18.874	0.298	-0.0381909	2019-03-12	B2	13°C	down	4
39	Track_39	17	1	1	0	0	0	17	9	26	1.529	39	36.061	50.392	0	0.098	0.148	0.042	0.11	0.028	19.052	20.02	18.276	18.903	0.506	0.200118	2019-03-12	B2	13°C	up	4
40	Track_40	44	1	1	0	0	0	44	11	55	0.151	40	9.548	92.901	0	0.009	0.059	0	0.007	0.01	19.749	21.674	18.287	19.49	1.128	0.011405	2019-03-12	B2	13°C	up	4
41	Track_41	40	4	1	0	0	0	43	12	55	0.007	41	70.811	88.664	0	0.008	0.024	0	0.007	0.005	18.467	18.944	18.255	18.457	0.14	0.00405139	2019-03-12	B2	13°C	up	4
42	Track_42	11	0	0	0	0	0	10	14	24	1.191	42	12.682	18.577	0	0.12	0.251	0.027	0.106	0.081	21.841	23.402	18.624	22.207	1.633	8.34252e-06	2019-03-12	B2	13°C	up	4
43	Track_43	22	3	3	0	0	0	26	21	47	19.13	43	44.765	91.807	0	0.736	0.847	0.467	0.739	0.091	19.343	20.462	18.363	19.294	0.542	0.0993727	2019-03-12	B2	13°C	up	4
44	Track_44	33	1	1	0	0	0	33	22	55	7.016	44	12.717	20.757	0	0.175	1.612	0	0.134	0.272	21.901	28.05	18.519	21.398	2.45	0.0047325	2019-03-12	B2	13°C	up	4
45	Track_45	17	1	3	0	0	0	19	22	41	10.744	45	18.463	28.043	0	0.568	0.864	0.446	0.572	0.103	20.023	22.857	18.296	20.026	1.522	0.229009	2019-03-12	B2	13°C	up	4
46	Track_46	3	0	0	0	0	0	2	28	30	0.022	46	11.997	45.129	0	0.012	0.017	0.006	0.017	0.008	18.421	18.662	18.264	18.337	0.173	0.417471	2019-03-12	B2	13°C	up	4
47	Track_47	8	1	1	0	0	0	8	29	37	4.45	47	18.227	13.376	0	0.603	0.823	0.36	0.589	0.151	22.315	29.224	19.376	20.762	3.696	0.011	2019-03-12	B2	13°C	up	4
48	Track_48	5	0	0	0	0	0	4	32	36	0.715	48	13.228	78.86	0	0.179	0.237	0.139	0.179	0.042	20.76	21.893	19.947	20.807	0.671	0.271414	2019-03-12	B2	13°C	up	4
49	Track_49	17	0	0	0	0	0	16	32	48	2.512	49	38.862	51.152	0	0.16	0.187	0.137	0.163	0.014	19.403	20.483	18.598	19.428	0.543	-0.1745	2019-03-12	B2	13°C	down	4
50	Track_50	9	0	0	0	0	0	8	35	43	1.286	50	14.033	17.105	0	0.292	1.631	0.006	0.033	0.575	19.277	19.955	18.802	19.083	0.396	0.0465931	2019-03-12	B2	13°C	up	4
51	Track_51	17	2	2	0	0	0	19	36	55	0.056	51	11.84	39.941	0	0.008	0.021	0	0.005	0.006	18.647	19.232	18.32	18.691	0.235	-0.05315	2019-03-12	B2	13°C	down	4
52	Track_52	11	2	2	0	0	0	13	37	50	3.612	52	14.045	26.405	0	0.158	1.224	0.003	0.044	0.376	18.399	18.729	18.256	18.374	0.141	0.00364243	2019-03-12	B2	13°C	up	4
53	Track_53	11	0	0	0	0	0	10	43	53	0.07	53	8.061	41.153	0	0.013	0.026	0.004	0.014	0.007	18.51	18.832	18.302	18.509	0.159	0.253578	2019-03-12	B2	13°C	up	4
54	Track_54	11	0	0	0	0	0	10	45	55	1.394	54	12.804	76.504	0	0.14	0.209	0	0.163	0.062	21.636	23.244	19.932	21.737	0.844	0.00784545	2019-03-12	B2	13°C	up	4
55	Track_55	3	0	0	0	0	0	2	53	55	0.85	55	29.066	91.839	0	0.425	0.85	0	0.85	0.601	18.936	19.063	18.873	18.873	0.09	-0.140764	2019-03-12	B2	13°C	down	4
56	Track_56	2	0	0	0	0	0	1	54	55	0	56	15.387	51.036	0	0	0	0	0	NA	18.728	18.728	18.728	18.728	0	0.027	2019-03-12	B2	13°C	up	4
1	Track_1	56	0	0	0	0	0	55	0	55	4.473	1	16.135	72.502	0	0.083	0.171	0	0.075	0.033	20.157	22.398	18.584	20.033	0.875	0.0127384	2019-03-12	B2	13°C	up	4
2	Track_2	38	2	3	0	0	0	41	0	41	12.257	2	14.458	79.356	0	0.306	0.488	0.118	0.313	0.094	21.164	23.705	18.581	21.246	1.138	-0.0715396	2019-03-12	B2	13°C	down	4
3	Track_3	56	0	0	0	0	0	55	0	55	0.029	3	109.621	34.249	0	0.008	0.036	0	0.005	0.008	25.37	26.685	24.422	25.353	0.664	-0.303533	2019-03-12	B2	13°C	down	4
4	Track_4	39	5	4	0	0	0	51	1	52	5.582	4	22.076	30.983	0	0.123	0.18	0.06	0.126	0.036	19.026	19.715	18.382	18.969	0.413	0.000363329	2019-03-12	B2	13°C	up	4
5	Track_5	55	1	1	0	0	0	55	0	55	6.253	5	114.939	52.982	0	0.119	0.183	0	0.12	0.034	32.952	35.501	31.042	32.7	0.911	-0.00140396	2019-03-12	B2	13°C	down	4
6	Track_6	56	0	0	0	0	0	55	0	55	8.196	6	33.422	76.149	0	0.164	0.277	0	0.167	0.061	23.103	24.087	21.815	23.148	0.546	-0.0663312	2019-03-12	B2	13°C	down	4
7	Track_7	56	0	0	0	0	0	55	0	55	3.862	7	12.007	29.146	0	0.076	0.189	0	0.072	0.055	22.503	24.757	19.826	22.625	1.037	-0.0882417	2019-03-12	B2	13°C	down	4
8	Track_8	53	1	3	0	0	0	55	0	55	0.033	8	8.359	78.505	0	0.008	0.032	0	0.006	0.008	28.134	28.822	25.857	28.267	0.512	0.0748051	2019-03-12	B2	13°C	up	4
9	Track_9	56	0	0	0	0	0	55	0	55	1.615	9	42.288	61.917	0	0.045	0.108	0	0.041	0.024	22.083	23.315	21.079	22.131	0.466	-0.000382857	2019-03-12	B2	13°C	down	4
10	Track_10	54	1	2	0	0	0	55	0	55	9.289	10	50.436	55.153	0	0.171	0.215	0	0.178	0.04	20.329	22.074	18.717	20.366	0.683	0.0147962	2019-03-12	B2	13°C	up	4
11	Track_11	25	2	3	0	0	0	29	0	29	2.219	11	11.423	41.858	0	0.04	0.606	0.001	0.013	0.121	20.535	22.154	18.455	20.861	1.236	0.0626309	2019-03-12	B2	13°C	up	4
12	Track_12	12	0	0	0	0	0	11	0	11	0.023	12	13.576	45.498	0	0.011	0.028	0.0008338	0.007	0.01	25.069	25.33	24.739	25.065	0.169	-0.0786019	2019-03-12	B2	13°C	down	4
13	Track_13	56	0	0	0	0	0	55	0	55	0.174	13	7.849	51.759	0	0.016	0.174	0	0	0.051	25.535	26.914	23.881	25.706	0.777	-0.00142657	2019-03-12	B2	13°C	down	4
14	Track_14	56	0	0	0	0	0	55	0	55	0.174	14	7.849	41.35	0	0.01	0.174	0	0	0.04	22.788	23.674	21.872	22.893	0.524	0.00343896	2019-03-12	B2	13°C	up	4
15	Track_15	53	1	3	0	0	0	55	0	55	0.228	15	12.933	42.389	0	0.01	0.042	0	0.009	0.009	25.957	27.026	23.363	26.231	0.992	0.00123206	2019-03-12	B2	13°C	up	4
16	Track_16	56	0	0	0	0	0	55	0	55	0.109	16	9.382	56.134	0	0.009	0.034	0	0.006	0.009	23.602	24.334	22.179	23.835	0.572	0.00380666	2019-03-12	B2	13°C	up	4
17	Track_17	56	0	0	0	0	0	55	0	55	1.034	17	66.636	54.574	0	0.045	0.121	0	0.043	0.029	22.427	23.585	20.515	22.438	0.681	0.00160694	2019-03-12	B2	13°C	up	4
18	Track_18	56	0	0	0	0	0	55	0	55	6.458	18	58.15	59.69	0	0.119	0.164	0	0.133	0.036	28.545	30.219	26.277	28.578	0.908	-0.0107942	2019-03-12	B2	13°C	down	4
19	Track_19	16	0	0	0	0	0	15	0	15	5.188	19	9.868	58.125	0	0.356	0.544	0	0.383	0.128	22.798	25.682	18.469	23.54	2.234	0.0271972	2019-03-12	B2	13°C	up	4
20	Track_20	55	1	1	0	0	0	55	0	55	3.544	20	8.516	82.127	0	0.067	0.138	0	0.068	0.043	26.03	27.846	23.608	26.151	0.899	0.168385	2019-03-12	B2	13°C	up	4
21	Track_21	51	2	3	0	0	0	55	0	55	7.174	21	12.622	43.337	0	0.14	1.581	0	0.137	0.221	23.182	29.319	19.508	23.483	1.955	-0.0688479	2019-03-12	B2	13°C	down	4
22	Track_22	56	0	0	0	0	0	55	0	55	5.845	22	31.082	74.538	0	0.108	0.157	0	0.112	0.031	20.324	21.979	19.151	20.285	0.702	0.141015	2019-03-12	B2	13°C	up	4
23	Track_23	56	0	0	0	0	0	55	0	55	14.119	23	51.676	50.681	0	0.26	0.36	0	0.277	0.061	21.864	23.989	19.47	21.878	0.922	-0.058236	2019-03-12	B2	13°C	down	4
24	Track_24	47	0	0	0	0	0	46	0	46	3.436	24	12.739	46.68	0	0.093	2.792	0.001	0.006	0.436	20.681	25.438	18.748	20.748	1.058	0.0515389	2019-03-12	B2	13°C	up	4
25	Track_25	52	1	4	0	0	0	55	0	55	33.264	25	19.298	20.533	0	0.64	1.393	0	0.776	0.524	23.333	26.909	20.225	23.599	1.395	-0.00361818	2019-03-12	B2	13°C	down	4
26	Track_26	56	0	0	0	0	0	55	0	55	8.576	26	32.711	70.294	0	0.162	0.236	0	0.175	0.049	24.479	26.17	22.371	24.668	0.812	0.292234	2019-03-12	B2	13°C	up	4
27	Track_27	55	0	0	0	0	0	54	1	55	5.525	27	12.104	69.784	0	0.103	0.184	0	0.11	0.038	26.508	29.028	20.954	26.562	1.641	-0.0466563	2019-03-12	B2	13°C	down	4
28	Track_28	56	0	0	0	0	0	55	0	55	5.065	28	23.11	36.648	0	0.103	0.175	0	0.103	0.033	22.628	24.534	20.065	22.835	1.074	-0.104028	2019-03-12	B2	13°C	down	4
29	Track_29	49	3	3	0	0	0	53	2	55	0.126	29	8.335	72.387	0	0.014	0.046	0	0.01	0.012	25.846	29.073	22.483	26.108	1.427	0.0132617	2019-03-12	B2	13°C	up	4
30	Track_30	54	0	0	0	0	0	53	2	55	0.155	30	11.887	73.178	0	0.017	0.055	0	0.016	0.011	20.75	22.223	18.605	20.722	0.763	-0.00190704	2019-03-12	B2	13°C	down	4
31	Track_31	4	0	0	0	0	0	3	17	20	0.011	31	13.597	45.5	0	0.005	0.006	0.004	0.005	0.0009022	25.565	25.737	25.472	25.533	0.102	-0.00321128	2019-03-12	B2	13°C	down	4
32	Track_32	26	2	3	0	0	0	29	26	55	2.16	32	8.197	84.801	0	0.08	0.156	0	0.07	0.053	25.032	26.416	24.182	24.926	0.561	0.0036	2019-03-12	B2	13°C	up	4
33	Track_33	16	0	0	0	0	0	15	26	41	2.977	33	11.46	42.756	0	0.203	2.769	0.004	0.01	0.711	20.33	22.631	18.507	20.357	0.974	-0.0789121	2019-03-12	B2	13°C	down	4
34	Track_34	5	0	0	0	0	0	4	31	35	0.349	34	7.849	69.209	0	0.087	0.174	0	0.174	0.101	19.451	20.031	18.937	19.257	0.46	0.114241	2019-03-12	B2	13°C	up	4
35	Track_35	5	0	0	0	0	0	4	33	37	0.093	35	13.57	45.753	0	0.024	0.039	0.004	0.031	0.015	24.56	25.353	23.893	24.472	0.604	-0.0872	2019-03-12	B2	13°C	down	4
36	Track_36	16	2	4	0	0	0	20	35	55	2.842	36	12.826	39.115	0	0.465	2.446	0	0.026	0.895	19.481	22.584	18.398	19.335	1.147	0.023	2019-03-12	B2	13°C	up	4
37	Track_37	2	0	0	0	0	0	1	32	33	0.183	37	9.36	44.007	0	0.183	0.183	0.183	0.183	NA	18.996	19.26	18.731	19.26	0.264	-0.166141	2019-03-12	B2	13°C	down	4
38	Track_38	17	0	0	0	0	0	16	39	55	2.428	38	11.444	42.507	0	0.589	3.475	0	0.005	1.276	20.408	26.721	18.895	20.139	1.619	0.182	2019-03-12	B2	13°C	up	4
39	Track_39	2	0	0	0	0	0	1	41	42	0.202	39	9.417	45.289	0	0.202	0.202	0.202	0.202	NA	18.833	19.041	18.625	19.041	0.208	0.0219902	2019-03-12	B2	13°C	up	4
40	Track_40	9	0	0	0	0	0	8	47	55	0.861	40	13.61	71.765	0	0.109	0.243	0	0.102	0.083	23.601	25.041	19.188	24.16	1.773	0.202	2019-03-12	B2	13°C	up	4
41	Track_41	6	0	0	0	0	0	5	50	55	0	41	7.849	60.698	0	0	0	0	0	0	19.337	19.743	18.405	19.464	0.429	-0.116283	2019-03-12	B2	13°C	down	4
1	Track_1	53	0	0	0	0	0	52	0	52	37.228	1	79.996	53.126	0	0.719	0.843	0	0.732	0.12	48.658	53.561	42.229	48.728	2.181	-0.0743491	2019-04-12	B4-15	15°C	down	4
2	Track_2	53	0	0	0	0	0	52	0	52	2.619	2	53.538	74.994	0	0.15	0.268	0	0.17	0.066	36.864	41.646	32.162	36.813	1.898	0.0594852	2019-04-12	B4-15	15°C	up	4
3	Track_3	53	0	0	0	0	0	52	0	52	22.162	3	62.777	19.123	0	0.434	0.527	0	0.456	0.089	45.915	50.035	43.09	45.978	1.617	0.0100705	2019-04-12	B4-15	15°C	up	4
4	Track_4	53	0	0	0	0	0	52	0	52	31.046	4	93.415	56.089	0	0.639	0.824	0	0.65	0.11	34.036	38.507	26.235	34.384	2.727	0.00685833	2019-04-12	B4-15	15°C	up	4
5	Track_5	53	0	0	0	0	0	52	0	52	3.691	5	126.396	71.744	0	0.071	0.204	0	0.059	0.044	31.557	33.384	28.229	31.71	1.275	0.213137	2019-04-12	B4-15	15°C	up	4
6	Track_6	53	0	0	0	0	0	52	0	52	0.012	6	91.983	82.558	0	0.015	0.053	0	0.013	0.012	26.857	27.518	26.07	26.933	0.369	0.0642178	2019-04-12	B4-15	15°C	up	4
7	Track_7	53	0	0	0	0	0	52	0	52	0.03	7	121.726	85.905	0	0.01	0.03	0	0.01	0.006	22.075	22.944	20.98	22.107	0.389	-0.00014159	2019-04-12	B4-15	15°C	down	4
8	Track_8	53	0	0	0	0	0	52	0	52	3.887	8	85.265	47.539	0	0.141	0.483	0	0.105	0.104	46.311	49.462	41.421	46.586	1.726	-0.000424045	2019-04-12	B4-15	15°C	down	4
9	Track_9	6	0	0	0	0	0	5	0	5	4.171	9	93.729	76.15	0	0.834	0.856	0.805	0.846	0.022	47.159	50.504	45.019	47.134	1.902	-0.00450323	2019-04-12	B4-15	15°C	down	4
10	Track_10	53	0	0	0	0	0	52	0	52	14.31	10	38.76	31.664	0	0.283	0.404	0	0.293	0.07	41.849	43.929	38.067	41.668	1.227	0.166971	2019-04-12	B4-15	15°C	up	4
11	Track_11	40	0	0	0	0	0	39	0	39	25.339	11	26.68	59.311	0	0.659	0.783	0.469	0.695	0.095	41.586	44.913	37.183	42.027	2.129	-0.0228333	2019-04-12	B4-15	15°C	down	4
12	Track_12	51	2	1	0	0	0	52	0	52	5.962	12	78.407	77.863	0	0.225	0.437	0	0.242	0.126	39.82	43.721	34.85	39.97	2.163	-0.398292	2019-04-12	B4-15	15°C	down	4
13	Track_13	23	2	3	0	0	0	26	0	26	10.684	13	18.83	80.367	0	0.413	0.595	0.204	0.42	0.133	45.117	47.608	41.977	45.479	1.349	0.0311395	2019-04-12	B4-15	15°C	up	4
14	Track_14	11	1	1	0	0	0	11	0	11	9.7	14	22.755	32.148	0	0.887	0.986	0.781	0.886	0.066	49.241	52.689	43.626	49.689	2.404	-0.398059	2019-04-12	B4-15	15°C	down	4
15	Track_15	7	0	0	0	0	0	6	0	6	1.249	15	44.894	65.78	0	0.209	0.23	0.17	0.216	0.023	44.531	45.868	43.223	44.206	0.97	0.0858682	2019-04-12	B4-15	15°C	up	4
16	Track_16	12	0	0	0	0	0	11	0	11	8.347	16	20.458	81.823	0	0.76	0.906	0.576	0.776	0.109	36.844	41.602	27.997	38.286	3.589	-0.0785714	2019-04-12	B4-15	15°C	down	4
17	Track_17	53	0	0	0	0	0	52	0	52	7.452	17	87.422	38.579	0	0.183	0.263	0	0.202	0.058	48.897	52.844	44.27	49.08	2.132	-0.33285	2019-04-12	B4-15	15°C	down	4
18	Track_18	52	0	0	0	0	0	51	1	52	0	18	107.356	91.015	0	0	0	0	0	0	21.58	22.542	20.645	21.643	0.503	-0.0503995	2019-04-12	B4-15	15°C	down	4
19	Track_19	53	0	0	0	0	0	52	0	52	0.02	19	128.547	76.453	0	0.007	0.017	0	0.007	0.004	18.966	19.866	18.292	18.956	0.344	1.56168e-15	2019-04-12	B4-15	15°C	up	4
20	Track_20	52	0	0	0	0	0	51	1	52	0	20	113.976	91.015	0	0	0	0	0	0	23.639	24.69	21.932	23.729	0.468	0.000394049	2019-04-12	B4-15	15°C	up	4
21	Track_21	7	0	0	0	0	0	6	0	6	0.15	21	103.526	15.098	0	0.03	0.04	0.02	0.034	0.008	46.227	48.784	43.329	46.226	2.012	1.56168e-15	2019-04-12	B4-15	15°C	up	4
22	Track_22	15	0	0	0	0	0	14	0	14	0.017	22	79.818	90.121	0	0.01	0.019	0.0007615	0.009	0.005	18.877	20.308	17.334	19.024	0.804	-0.0220714	2019-04-12	B4-15	15°C	down	4
23	Track_23	53	0	0	0	0	0	52	0	52	3.8	23	54.335	33.156	0	0.166	0.311	0	0.16	0.081	50.965	55.473	45.941	51.093	2.082	0.000271429	2019-04-12	B4-15	15°C	up	4
24	Track_24	2	0	0	0	0	0	1	8	9	0.875	24	88.662	77.053	0	0.875	0.875	0.875	0.875	NA	47.013	47.646	46.381	47.646	0.632	-0.0253158	2019-04-12	B4-15	15°C	down	4
25	Track_25	4	1	1	0	0	0	4	14	18	0.319	25	63.5	15.997	0	0.079	0.101	0.054	0.083	0.024	18.092	18.922	17.505	18.334	0.576	0.129	2019-04-12	B4-15	15°C	up	4
26	Track_26	33	2	3	0	0	0	38	14	52	11.919	26	37.064	63.815	0	0.314	0.367	0	0.324	0.061	45.006	48.385	40.986	45.047	1.453	0.0792	2019-04-12	B4-15	15°C	up	4
27	Track_27	8	2	4	0	0	0	12	31	43	0.51	27	63.063	15.879	0	0.05	0.062	0.041	0.047	0.008	17.429	18.214	16.918	17.446	0.438	-0.0726097	2019-04-12	B4-15	15°C	down	4
28	Track_28	3	0	0	0	0	0	2	48	50	1.822	28	17.894	90.852	0	0.953	1.034	0.871	1.034	0.116	34.554	38.464	27.909	37.288	4.723	-0.0422571	2019-04-12	B4-15	15°C	down	4
1	Track_1	53	0	0	0	0	0	52	0	52	20.737	1	17.789	29.386	0	0.41	0.595	0	0.422	0.131	48.948	55.693	36.472	50.582	5.366	0.0455184	2019-04-12	B4-15	15°C	up	4
2	Track_2	53	0	0	0	0	0	52	0	52	25.324	2	40.692	30.38	0	0.533	1.061	0	0.602	0.297	51.385	54.027	47.285	51.758	1.753	0.291609	2019-04-12	B4-15	15°C	up	4
3	Track_3	53	0	0	0	0	0	52	0	52	4.253	3	43.124	17.952	0	0.155	0.394	0	0.12	0.105	49.231	52.531	45.5	49.474	1.913	-0.098063	2019-04-12	B4-15	15°C	down	4
4	Track_4	53	0	0	0	0	0	52	0	52	14.265	4	106.422	22.194	0	0.307	0.536	0	0.292	0.091	46.817	49.978	43.448	47.003	1.3	-0.0565749	2019-04-12	B4-15	15°C	down	4
5	Track_5	50	3	1	0	0	0	52	0	52	0.79	5	16.239	51.626	0	0.128	0.436	0	0.12	0.088	38.174	43.941	31.214	38.851	3.271	-0.204888	2019-04-12	B4-15	15°C	down	4
6	Track_6	53	0	0	0	0	0	52	0	52	0	6	123.393	13.498	0	0.033	0.214	0	0	0.078	40.485	42.796	36.929	40.891	1.394	-0.0239294	2019-04-12	B4-15	15°C	down	4
7	Track_7	53	0	0	0	0	0	52	0	52	3.242	7	130.131	54.556	0	0.069	0.216	0	0.041	0.068	38.295	41.561	35.998	38.133	1.248	-1.89779e-16	2019-04-12	B4-15	15°C	down	4
8	Track_8	29	0	0	0	0	0	28	0	28	13.456	8	12.1	82.609	0	0.483	0.697	0.29	0.471	0.102	49.194	66.047	31.659	50.345	11.778	-0.0513335	2019-04-12	B4-15	15°C	down	4
9	Track_9	53	0	0	0	0	0	52	0	52	36.312	9	85.215	29.399	0	0.702	0.987	0	0.747	0.233	49.734	54.434	46.072	49.594	1.945	-0.468167	2019-04-12	B4-15	15°C	down	4
10	Track_10	53	0	0	0	0	0	52	0	52	31.674	10	44.514	72.053	0	0.633	1.035	0	0.638	0.22	47.834	54.052	43.482	47.716	2.481	0.212382	2019-04-12	B4-15	15°C	up	4
11	Track_11	53	0	0	0	0	0	52	0	52	10.274	11	101.667	15.603	0	0.269	0.494	0	0.27	0.123	43.041	50.22	35.635	44.089	4.296	0.238407	2019-04-12	B4-15	15°C	up	4
12	Track_12	2	0	0	0	0	0	1	0	1	0.764	12	15.701	90.743	0	0.764	0.764	0.764	0.764	NA	46.072	51.195	40.949	51.195	5.123	-0.111291	2019-04-12	B4-15	15°C	down	4
13	Track_13	42	0	0	0	0	0	41	0	41	20.428	13	18.487	45.426	0	0.539	0.974	0.311	0.507	0.183	52.534	60.639	33.985	53.465	5.477	-0.133	2019-04-12	B4-15	15°C	down	4
14	Track_14	32	0	0	0	0	0	31	0	31	0.033	14	129.922	52.527	0	0.014	0.037	0.0001425	0.009	0.013	80.362	81.218	78.161	80.707	0.819	0.273301	2019-04-12	B4-15	15°C	up	4
15	Track_15	21	0	0	0	0	0	20	0	20	15.786	15	22.748	44.984	0	0.79	0.905	0.596	0.821	0.089	49.5	54.522	40.747	49.327	3.308	0.000104289	2019-04-12	B4-15	15°C	up	4
16	Track_16	53	0	0	0	0	0	52	0	52	21.55	16	105.897	43.818	0	0.424	0.7	0	0.443	0.179	49.908	53.31	46.49	50.154	1.851	0.227406	2019-04-12	B4-15	15°C	up	4
17	Track_17	53	0	0	0	0	0	52	0	52	26.493	17	31.339	75.525	0	0.526	0.722	0	0.581	0.145	50.893	54.773	45.959	50.982	2.023	0.416515	2019-04-12	B4-15	15°C	up	4
18	Track_18	46	4	4	0	0	0	52	0	52	0.02	18	12.617	86.855	0	0.011	0.043	0	0.008	0.01	31.897	32.681	30.971	31.903	0.346	-0.281785	2019-04-12	B4-15	15°C	down	4
19	Track_19	53	0	0	0	0	0	52	0	52	36.637	19	27.348	17.982	0	0.766	1.052	0	0.785	0.198	48.249	57.586	35.042	48.604	5.011	-5.27941e-05	2019-04-12	B4-15	15°C	down	4
20	Track_20	51	2	1	0	0	0	52	0	52	1.914	20	43.204	52.62	0	0.336	0.658	0	0.313	0.161	38.136	43.552	31.414	38.122	2.785	0.16303	2019-04-12	B4-15	15°C	up	4
21	Track_21	2	0	0	0	0	0	1	25	26	0.857	21	15.855	13.498	0	0.857	0.857	0.857	0.857	NA	48.293	51.827	44.759	51.827	3.534	0.0246542	2019-04-12	B4-15	15°C	up	4
22	Track_22	4	0	0	0	0	0	3	49	52	0.058	22	129.951	52.508	0	0.019	0.058	0	0	0.034	81.297	81.826	79.709	81.826	0.917	5.0243e-15	2019-04-12	B4-15	15°C	up	4
1	Track_1	55	0	0	0	0	0	54	0	54	16.818	1	95.861	20.032	0	0.414	0.698	0.11	0.367	0.19	48.89	52.83	44.955	48.737	1.721	-0.192439	2019-04-12	B4-15	15°C	down	4
2	Track_2	62	0	0	0	0	0	61	0	61	9.582	2	29.279	49.672	0	0.168	0.215	0	0.168	0.039	41.789	45.152	34.155	41.6	1.601	-0.146737	2019-04-12	B4-15	15°C	down	4
3	Track_3	60	1	2	0	0	0	61	0	61	31.831	3	25.244	75.677	0	0.53	0.76	0	0.543	0.183	53.409	64.074	45.205	53.094	3.185	0.14511	2019-04-12	B4-15	15°C	up	4
4	Track_4	62	0	0	0	0	0	61	0	61	33.065	4	38.924	84.503	0	0.568	0.68	0	0.598	0.118	37.443	41.717	31.476	37.454	2.272	-0.0484391	2019-04-12	B4-15	15°C	down	4
5	Track_5	62	0	0	0	0	0	61	0	61	13.536	5	105.187	23.062	0	0.235	0.294	0	0.249	0.053	43.332	47.194	38.837	43.51	1.931	0.0265959	2019-04-12	B4-15	15°C	up	4
6	Track_6	62	0	0	0	0	0	61	0	61	15.704	6	62.193	55.524	0	0.282	0.62	0	0.255	0.141	39.604	43.803	36.108	39.143	1.545	-0.192974	2019-04-12	B4-15	15°C	down	4
7	Track_7	62	0	0	0	0	0	61	0	61	16.978	7	91.49	26.262	0	0.311	0.388	0	0.331	0.07	45.927	49.158	42.494	45.912	1.638	0.128664	2019-04-12	B4-15	15°C	up	4
8	Track_8	24	0	0	0	0	0	23	0	23	9.293	8	14.311	35.692	0	0.408	0.444	0.353	0.415	0.024	46.077	56.096	32.975	47.739	7.305	-0.111262	2019-04-12	B4-15	15°C	down	4
9	Track_9	62	0	0	0	0	0	61	0	61	8.816	9	29.881	44.595	0	0.15	0.281	0	0.148	0.07	44.379	47.207	41.231	44.597	1.414	0.35415	2019-04-12	B4-15	15°C	up	4
10	Track_10	25	0	0	0	0	0	24	0	24	7.289	10	27.895	36.446	0	0.312	0.394	0.276	0.3	0.034	45.595	48.241	37.605	46.076	2.229	0.14013	2019-04-12	B4-15	15°C	up	4
11	Track_11	62	0	0	0	0	0	61	0	61	17.872	11	55.253	58.148	0	0.325	0.54	0	0.302	0.095	41.493	47.056	37.626	41.17	2.332	0.0310769	2019-04-12	B4-15	15°C	up	4
12	Track_12	4	0	0	0	0	0	3	0	3	0.046	12	93.262	89.819	0	0.016	0.028	0.002	0.017	0.013	28.575	29.097	27.22	29.005	0.783	0.12512	2019-04-12	B4-15	15°C	up	4
13	Track_13	62	0	0	0	0	0	61	0	61	11.584	13	23.039	38.259	0	0.194	0.408	0	0.202	0.068	47.628	50.707	39.679	47.953	2.042	-0.0002	2019-04-12	B4-15	15°C	down	4
14	Track_14	62	0	0	0	0	0	61	0	61	1.328	14	126.444	33.77	0	0.027	0.058	0	0.029	0.015	51.832	53.857	48.662	52.16	1.325	0.207135	2019-04-12	B4-15	15°C	up	4
15	Track_15	62	0	0	0	0	0	61	0	61	9.282	15	79.295	51.22	0	0.191	0.302	0	0.206	0.08	45.526	48.879	42.895	45.552	1.356	-0.0260524	2019-04-12	B4-15	15°C	down	4
16	Track_16	60	1	2	0	0	0	61	0	61	2.13	16	93.4	89.806	0	0.054	0.39	0	0.012	0.104	29.468	39.818	27.052	28.92	2.009	-0.0303442	2019-04-12	B4-15	15°C	down	4
17	Track_17	5	0	0	0	0	0	4	0	4	1.742	17	15.383	76.352	0	0.439	0.471	0.403	0.461	0.032	42.078	55.641	27.357	40.412	10.869	0.000964763	2019-04-12	B4-15	15°C	up	4
18	Track_18	11	0	0	0	0	0	10	0	10	2.937	18	12.061	32.911	0	0.299	0.52	0.14	0.255	0.152	36.91	40.012	33.591	36.798	1.959	-0.2833	2019-04-12	B4-15	15°C	down	4
19	Track_19	13	0	0	0	0	0	12	0	12	9.028	19	14.612	20.504	0	0.764	0.924	0.675	0.753	0.084	42.366	50.428	33.369	42.659	5.502	0.3	2019-04-12	B4-15	15°C	up	4
20	Track_20	34	0	0	0	0	0	33	0	33	15.8	20	48.044	89.82	0	0.504	0.838	0.208	0.471	0.183	35.34	41.588	26.264	36.805	4.114	0.531527	2019-04-12	B4-15	15°C	up	4
21	Track_21	62	0	0	0	0	0	61	0	61	36.365	21	52.564	38.816	0	0.597	0.704	0	0.613	0.119	45.743	49.478	41.824	45.752	1.724	0.312863	2019-04-12	B4-15	15°C	up	4
22	Track_22	30	3	1	0	0	0	32	0	32	0.009	22	126.379	52.254	0	0.004	0.022	4.345e-05	0.003	0.005	65.575	66.344	65.011	65.535	0.295	-0.0809773	2019-04-12	B4-15	15°C	down	4
23	Track_23	50	0	0	0	0	0	49	12	61	11.748	23	97.619	87.046	0	0.258	0.389	0	0.291	0.104	29.536	33.117	26.424	29.784	1.573	-8.82309e-05	2019-04-12	B4-15	15°C	down	4
24	Track_24	26	0	0	0	0	0	25	27	52	13.072	24	17.699	41.289	0	0.523	0.654	0.428	0.527	0.045	47.737	53.5	39.219	48.78	3.984	-0.0634521	2019-04-12	B4-15	15°C	down	4
25	Track_25	7	2	2	0	0	0	9	38	47	0.007	25	126.385	52.253	0	0.006	0.015	0.002	0.005	0.005	65.93	66.191	65.553	65.911	0.186	0.274994	2019-04-12	B4-15	15°C	up	4
1	Track_1	51	0	0	0	0	0	50	0	50	5.095	1	67.56	53.596	0	0.118	0.199	0	0.122	0.049	39.617	42.23	36.325	39.785	1.27	-0.0199987	2019-04-12	B4	13°C	down	4
2	Track_2	47	1	4	0	0	0	50	0	50	5.011	2	61.487	69.477	0	0.114	0.223	0	0.12	0.05	46.771	49.879	43.178	46.762	1.465	-0.0386618	2019-04-12	B4	13°C	down	4
3	Track_3	51	0	0	0	0	0	50	0	50	19.083	3	33.257	59.038	0	0.387	0.638	0	0.38	0.145	46.728	50.655	43.23	46.442	2.056	0.0131748	2019-04-12	B4	13°C	up	4
4	Track_4	51	0	0	0	0	0	50	0	50	0.533	4	63.536	66.44	0	0.084	0.217	0	0.076	0.046	41.393	43.587	39.208	41.448	1.096	-0.122374	2019-04-12	B4	13°C	down	4
5	Track_5	51	0	0	0	0	0	50	0	50	11.945	5	116.144	59.93	0	0.246	0.337	0	0.258	0.072	39.654	46.362	32.887	38.743	4.164	-0.00106262	2019-04-12	B4	13°C	down	4
6	Track_6	51	0	0	0	0	0	50	0	50	8.621	6	52.817	78.353	0	0.178	0.284	0	0.184	0.054	36.517	38.001	34.502	36.481	0.826	0.197188	2019-04-12	B4	13°C	up	4
7	Track_7	51	0	0	0	0	0	50	0	50	5.187	7	22.483	57.466	0	0.118	0.238	0	0.121	0.056	38.008	40.353	34.792	37.754	1.335	-0.00363176	2019-04-12	B4	13°C	down	4
8	Track_8	51	0	0	0	0	0	50	0	50	5.487	8	19.269	64.693	0	0.123	0.212	0	0.123	0.051	48.778	53.002	43.573	48.805	1.901	-0.0865479	2019-04-12	B4	13°C	down	4
9	Track_9	42	3	4	0	0	0	50	0	50	9.817	9	104.544	30.873	0	0.204	1.363	0	0.195	0.198	39.273	44.067	28.4	39.976	3.509	-0.0957315	2019-04-12	B4	13°C	down	4
10	Track_10	38	0	0	0	0	0	37	0	37	16.712	10	53.983	69.416	0	0.457	0.544	0.363	0.457	0.048	43.536	46.077	36.806	43.647	1.72	-0.0649977	2019-04-12	B4	13°C	down	4
11	Track_11	51	0	0	0	0	0	50	0	50	20.104	11	34.195	69.746	0	0.408	0.548	0	0.413	0.103	44.667	47.042	40.404	44.894	1.447	0.0365903	2019-04-12	B4	13°C	up	4
12	Track_12	51	0	0	0	0	0	50	0	50	13.935	12	88.538	46.884	0	0.291	0.405	0	0.307	0.076	41.319	44.288	38.614	41.563	1.19	-0.243489	2019-04-12	B4	13°C	down	4
13	Track_13	16	0	0	0	0	0	15	0	15	6.45	13	17.82	41.969	0	0.432	0.503	0.331	0.448	0.051	37.263	41.169	29.236	37.387	2.771	-0.199565	2019-04-12	B4	13°C	down	4
14	Track_14	51	0	0	0	0	0	50	0	50	10.903	14	77.533	63.354	0	0.26	0.445	0	0.248	0.094	35.666	39.153	31.438	35.865	2.11	0.126706	2019-04-12	B4	13°C	up	4
15	Track_15	51	0	0	0	0	0	50	0	50	4.432	15	80.956	72.299	0	0.124	0.287	0	0.129	0.054	37.797	40.853	35.242	37.594	1.345	-0.164074	2019-04-12	B4	13°C	down	4
16	Track_16	51	0	0	0	0	0	50	0	50	17.276	16	27.052	75.617	0	0.361	0.613	0	0.377	0.128	36.433	39.809	29.362	36.678	1.777	0.00258941	2019-04-12	B4	13°C	up	4
17	Track_17	51	0	0	0	0	0	50	0	50	1.414	17	98.24	61.402	0	0.109	0.23	0	0.102	0.055	41.747	45.227	37.298	41.738	1.391	-0.23783	2019-04-12	B4	13°C	down	4
18	Track_18	51	0	0	0	0	0	50	0	50	7.015	18	91.131	66.707	0	0.154	0.273	0	0.165	0.063	43.647	45.982	41.005	43.614	1.139	-0.00114633	2019-04-12	B4	13°C	down	4
19	Track_19	51	0	0	0	0	0	50	0	50	15.269	19	57.498	39.301	0	0.312	0.464	0	0.342	0.099	42.723	44.655	40.142	42.712	1.073	0.051957	2019-04-12	B4	13°C	up	4
20	Track_20	20	0	0	0	0	0	19	0	19	7.689	20	21.159	74.428	0	0.422	0.583	0.314	0.406	0.09	42.084	46.705	37.481	42.012	2.248	-0.0776486	2019-04-12	B4	13°C	down	4
21	Track_21	51	0	0	0	0	0	50	0	50	6.816	21	92.985	39.376	0	0.188	0.346	0	0.179	0.072	33.235	35.673	30.186	33.296	1.387	-0.241348	2019-04-12	B4	13°C	down	4
22	Track_22	39	1	2	0	0	0	40	0	40	6.547	22	116.327	39.839	0	0.184	0.38	0.061	0.162	0.082	41.08	45.179	36.504	41.856	2.534	-0.071669	2019-04-12	B4	13°C	down	4
23	Track_23	51	0	0	0	0	0	50	0	50	18.691	23	68.6	42.462	0	0.381	0.565	0	0.425	0.13	41.697	44.618	39.083	41.62	1.483	0.150408	2019-04-12	B4	13°C	up	4
24	Track_24	51	0	0	0	0	0	50	0	50	9.3	24	79.835	84.014	0	0.274	0.521	0	0.256	0.138	32.733	35.978	29.244	32.856	1.638	-0.0722971	2019-04-12	B4	13°C	down	4
25	Track_25	51	0	0	0	0	0	50	0	50	2.255	25	63.825	51.692	0	0.079	0.17	0	0.088	0.041	42.388	44.605	38.682	42.399	1.366	0.131688	2019-04-12	B4	13°C	up	4
26	Track_26	15	3	3	0	0	0	21	2	23	4.389	26	33.652	79.765	0	0.251	0.342	0.111	0.278	0.078	41.686	43.712	39.532	41.73	1.153	-0.0163031	2019-04-12	B4	13°C	down	4
27	Track_27	5	0	0	0	0	0	4	15	19	1.294	27	11.226	28.616	0	0.326	0.427	0.204	0.402	0.106	33.551	34.631	32.102	33.937	0.95	-0.154843	2019-04-12	B4	13°C	down	4
28	Track_28	32	0	0	0	0	0	31	19	50	4.848	28	121.898	74.988	0	0.163	0.224	0	0.173	0.053	34.972	37.062	31.951	35.346	1.351	0.3186	2019-04-12	B4	13°C	up	4
29	Track_29	4	0	0	0	0	0	3	34	37	1.055	29	14.695	69.106	0	0.384	0.439	0.32	0.393	0.06	35.179	42.501	28.321	35.522	5.035	0.137697	2019-04-12	B4	13°C	up	4
30	Track_30	3	0	0	0	0	0	2	35	37	0.449	30	32.237	75.48	0	0.225	0.266	0.184	0.266	0.058	43.667	44.288	42.498	44.216	0.827	-0.1767	2019-04-12	B4	13°C	down	4
31	Track_31	16	0	0	0	0	0	15	35	50	4.705	31	13.964	37.163	0	0.315	0.478	0	0.359	0.142	43.267	45.322	40.403	42.841	1.662	-0.2235	2019-04-12	B4	13°C	down	4
32	Track_32	10	0	0	0	0	0	9	41	50	2.821	32	66.036	70.147	0	0.315	0.468	0	0.407	0.185	42.49	43.463	40.599	42.997	0.917	0.329716	2019-04-12	B4	13°C	up	4
33	Track_33	4	0	0	0	0	0	3	47	50	0.304	33	32.577	73.57	0	0.101	0.304	0	0	0.175	41.196	41.807	40.993	40.993	0.353	0.0168364	2019-04-12	B4	13°C	up	4
1	Track_1	47	0	0	0	0	0	46	0	46	4.287	1	37.374	72.954	0	0.13	0.256	0	0.136	0.053	46.667	49.27	43.517	46.567	1.431	0.0224269	2019-04-12	B4	13°C	up	4
2	Track_2	47	0	0	0	0	0	46	0	46	8.713	2	15.838	62.73	0	0.195	0.29	0	0.208	0.057	41.285	50.574	19.111	44.957	8.794	-0.0230822	2019-04-12	B4	13°C	down	4
3	Track_3	47	0	0	0	0	0	46	0	46	15.035	3	96.076	36.641	0	0.333	0.493	0	0.35	0.097	43.894	47.27	41.127	44.031	1.225	0.140778	2019-04-12	B4	13°C	up	4
4	Track_4	47	0	0	0	0	0	46	0	46	2.572	4	104.231	66.208	0	0.09	0.241	0	0.079	0.056	43.531	46.269	41.23	43.551	1.284	-0.0982377	2019-04-12	B4	13°C	down	4
5	Track_5	18	0	0	0	0	0	17	0	17	4.396	5	16.721	70.019	0	0.286	0.363	0.167	0.288	0.055	42.781	53.537	21.401	46.239	9.837	0.0581146	2019-04-12	B4	13°C	up	4
6	Track_6	47	0	0	0	0	0	46	0	46	1.086	6	85.795	60.911	0	0.153	0.318	0	0.162	0.081	39.517	42.624	35.79	39.643	1.534	-0.022065	2019-04-12	B4	13°C	down	4
7	Track_7	43	1	4	0	0	0	46	0	46	13.098	7	61.497	50.335	0	0.36	0.565	0	0.404	0.153	47.03	50.539	42.448	47.116	1.955	-0.0144644	2019-04-12	B4	13°C	down	4
8	Track_8	11	1	1	0	0	0	11	0	11	0	8	8.216	41.902	0	0	0	0	0	0	20.228	21.916	19.478	20.07	0.666	-0.165307	2019-04-12	B4	13°C	down	4
9	Track_9	47	0	0	0	0	0	46	0	46	9.185	9	69.893	46.801	0	0.209	0.34	0	0.22	0.073	42.125	45.218	39.223	42.235	1.537	-1.98219e-15	2019-04-12	B4	13°C	down	4
10	Track_10	43	1	4	0	0	0	46	0	46	8.861	10	118.254	83.07	0	0.196	0.304	0	0.207	0.06	51.326	59.814	42.424	51.141	4.152	-0.0805626	2019-04-12	B4	13°C	down	4
11	Track_11	47	0	0	0	0	0	46	0	46	4.312	11	65.87	66.403	0	0.107	0.29	0	0.098	0.072	45.984	48.498	43.522	45.997	1.312	0.0769272	2019-04-12	B4	13°C	up	4
12	Track_12	47	0	0	0	0	0	46	0	46	6.034	12	114.132	72.073	0	0.14	0.288	0	0.153	0.065	34.099	37.245	30.55	34.346	1.259	-0.0994573	2019-04-12	B4	13°C	down	4
13	Track_13	47	0	0	0	0	0	46	0	46	18.89	13	62.154	58.394	0	0.414	0.591	0	0.435	0.122	45.897	48.725	41.908	45.902	1.601	0.137136	2019-04-12	B4	13°C	up	4
14	Track_14	33	0	0	0	0	0	32	0	32	7.591	14	105.536	40.942	0	0.244	0.325	0.152	0.25	0.048	42.701	47.559	33.116	43.169	2.839	-0.186938	2019-04-12	B4	13°C	down	4
15	Track_15	47	0	0	0	0	0	46	0	46	2.568	15	65.314	71.225	0	0.074	0.179	0	0.068	0.042	51.377	54.133	48.148	51.361	1.779	-0.0558366	2019-04-12	B4	13°C	down	4
16	Track_16	47	0	0	0	0	0	46	0	46	1.559	16	100.866	37.871	0	0.145	0.317	0	0.154	0.075	35.657	38.639	32.596	35.766	1.615	-0.0402596	2019-04-12	B4	13°C	down	4
17	Track_17	47	0	0	0	0	0	46	0	46	3.124	17	122.207	49.654	0	0.12	0.353	0	0.113	0.08	49.411	52.525	44.502	49.609	1.616	-0.0231574	2019-04-12	B4	13°C	down	4
18	Track_18	47	0	0	0	0	0	46	0	46	4.397	18	100.608	74.887	0	0.113	0.252	0	0.111	0.06	46.679	50.279	43.85	46.519	1.576	0.067103	2019-04-12	B4	13°C	up	4
19	Track_19	43	1	4	0	0	0	46	0	46	5.428	19	67.703	49.353	0	0.158	0.396	0	0.132	0.097	45.979	49.745	38.529	46.322	1.907	0.0876008	2019-04-12	B4	13°C	up	4
20	Track_20	47	0	0	0	0	0	46	0	46	10.069	20	66.453	91.952	0	0.31	0.481	0	0.307	0.105	36.572	40.335	31.798	36.309	1.808	-0.120383	2019-04-12	B4	13°C	down	4
21	Track_21	47	0	0	0	0	0	46	0	46	12.329	21	81.902	72.295	0	0.277	0.372	0	0.294	0.076	46.492	50.126	42.132	46.799	1.939	0.0116995	2019-04-12	B4	13°C	up	4
22	Track_22	47	0	0	0	0	0	46	0	46	7.446	22	75.43	34.403	0	0.172	0.29	0	0.173	0.065	45.106	47.768	41.4	45.2	1.446	-0.0270985	2019-04-12	B4	13°C	down	4
23	Track_23	47	0	0	0	0	0	46	0	46	1.913	23	86.414	78.261	0	0.082	0.195	0	0.079	0.052	40.391	44.11	36.309	40.645	1.54	-0.0803725	2019-04-12	B4	13°C	down	4
24	Track_24	47	0	0	0	0	0	46	0	46	7.725	24	65.64	80.586	0	0.173	0.279	0	0.17	0.053	38.532	39.77	36.52	38.581	0.803	0.0333377	2019-04-12	B4	13°C	up	4
25	Track_25	47	0	0	0	0	0	46	0	46	2.675	25	74.67	52.873	0	0.088	0.215	0	0.09	0.048	44.071	47.616	41.114	43.816	1.562	-0.00351364	2019-04-12	B4	13°C	down	4
26	Track_26	46	1	1	0	0	0	46	0	46	1.271	26	11.312	30.634	0	0.174	0.316	0	0.176	0.072	21.747	24.263	19.029	21.903	1.411	-0.0581674	2019-04-12	B4	13°C	down	4
27	Track_27	47	0	0	0	0	0	46	0	46	4.737	27	11.915	39.307	0	0.115	0.25	0	0.114	0.068	21.233	22.527	19.49	21.243	0.815	0.0222675	2019-04-12	B4	13°C	up	4
28	Track_28	47	0	0	0	0	0	46	0	46	2.502	28	114.057	29.567	0	0.085	0.201	0	0.082	0.053	44.514	47.218	39.776	44.762	1.98	0.102672	2019-04-12	B4	13°C	up	4
29	Track_29	40	2	1	0	0	0	41	5	46	10.711	29	16.831	53.613	0	0.265	0.388	0	0.263	0.09	54.492	59.284	48.362	54.278	2.23	-0.0511196	2019-04-12	B4	13°C	down	4
30	Track_30	16	3	3	0	0	0	20	17	37	0	30	8.216	41.889	0	0.017	0.205	0	0	0.054	20.234	21.243	19.056	20.499	0.671	0.266343	2019-04-12	B4	13°C	up	4
31	Track_31	7	1	2	0	0	0	8	17	25	0	31	12.324	25.675	0	0	0	0	0	0	20.85	22.506	19.88	20.502	0.957	-0.000982931	2019-04-12	B4	13°C	down	4
32	Track_32	11	3	3	0	0	0	15	31	46	0	32	12.324	25.675	0	0	0	0	0	0	21.634	22.739	20.464	21.638	0.653	7.74967e-16	2019-04-12	B4	13°C	up	4
33	Track_33	14	1	4	0	0	0	17	29	46	1.931	33	111.646	40.05	0	0.137	0.248	0	0.168	0.076	38.722	51.377	25.041	39.753	6.17	-6.65707e-16	2019-04-12	B4	13°C	down	4
34	Track_34	3	0	0	0	0	0	2	44	46	0	34	8.216	41.902	0	0	0	0	0	0	22.017	22.017	22.017	22.017	0	-0.0141632	2019-04-12	B4	13°C	down	4
1	Track_1	24	2	1	0	0	0	25	0	25	7.205	1	91.705	24.436	0	0.326	0.489	0.234	0.312	0.062	30.657	33.463	29.043	30.538	0.99	-0.013573	2019-04-12	B4	13°C	down	4
2	Track_2	41	0	0	0	0	0	40	0	40	6.275	2	17.027	60.219	0	0.164	0.287	0	0.171	0.074	44.286	48.805	39.703	44.218	1.896	-0.0680933	2019-04-12	B4	13°C	down	4
3	Track_3	41	0	0	0	0	0	40	0	40	1.425	3	62.674	65.89	0	0.093	0.237	0	0.067	0.062	35.757	37.619	33.692	35.615	0.932	0.111605	2019-04-12	B4	13°C	up	4
4	Track_4	41	0	0	0	0	0	40	0	40	11.185	4	79.437	43.15	0	0.283	0.419	0	0.283	0.067	36.848	39.481	33.252	37.037	1.407	-0.00727213	2019-04-12	B4	13°C	down	4
5	Track_5	41	0	0	0	0	0	40	0	40	4.303	5	83.311	48.261	0	0.183	0.412	0	0.154	0.117	32.853	35.53	29.965	32.694	1.298	-0.0965467	2019-04-12	B4	13°C	down	4
6	Track_6	41	0	0	0	0	0	40	0	40	8.904	6	77.446	37.158	0	0.228	0.325	0	0.234	0.06	39.456	42.141	35.77	39.726	1.49	-0.11314	2019-04-12	B4	13°C	down	4
7	Track_7	38	1	3	0	0	0	40	0	40	3.452	7	108.822	33.144	0	0.121	0.672	0	0.116	0.114	38.065	43.633	31.575	38.12	2.534	-0.0740469	2019-04-12	B4	13°C	down	4
8	Track_8	41	0	0	0	0	0	40	0	40	1.865	8	102.753	70.009	0	0.109	0.277	0	0.107	0.062	39.592	44.469	36.47	39.675	1.988	-0.0714079	2019-04-12	B4	13°C	down	4
9	Track_9	39	2	1	0	0	0	40	0	40	8.453	9	93.45	69.306	0	0.233	0.362	0	0.246	0.074	31.875	34.621	28.924	32.075	1.532	0.0336965	2019-04-12	B4	13°C	up	4
10	Track_10	39	1	2	0	0	0	40	0	40	12.172	10	99.866	63.054	0	0.315	0.459	0	0.321	0.093	34.81	37.803	30.619	35.02	1.442	-0.0855407	2019-04-12	B4	13°C	down	4
11	Track_11	41	0	0	0	0	0	40	0	40	3.231	11	75.257	32.268	0	0.1	0.201	0	0.111	0.058	35.167	36.512	32.932	35.125	0.824	-0.0826716	2019-04-12	B4	13°C	down	4
12	Track_12	41	0	0	0	0	0	40	0	40	4.921	12	117.249	37.43	0	0.139	0.24	0	0.148	0.049	41.907	47.721	35.807	42.463	2.868	-0.0745807	2019-04-12	B4	13°C	down	4
13	Track_13	35	0	0	0	0	0	34	0	34	10.608	13	95.36	96.257	0	0.315	0.474	0.147	0.319	0.084	39.142	42.592	34.083	39.304	2.251	-0.0876798	2019-04-12	B4	13°C	down	4
14	Track_14	41	0	0	0	0	0	40	0	40	4.085	14	104.833	74.406	0	0.122	0.274	0	0.1	0.073	37.482	40.685	29.822	38.063	2.076	0.0641627	2019-04-12	B4	13°C	up	4
15	Track_15	41	0	0	0	0	0	40	0	40	3.887	15	38.44	65.722	0	0.136	0.263	0	0.143	0.063	40.244	43.287	37.307	40.168	1.172	0.0365181	2019-04-12	B4	13°C	up	4
16	Track_16	7	0	0	0	0	0	6	0	6	0.72	16	114.102	67.079	0	0.122	0.19	0.093	0.122	0.038	30.57	31.196	29.569	30.969	0.627	0.010023	2019-04-12	B4	13°C	up	4
17	Track_17	41	0	0	0	0	0	40	0	40	1.127	17	59.327	71.495	0	0.064	0.114	0	0.068	0.028	43.172	48.001	39.192	42.874	2.249	-0.116393	2019-04-12	B4	13°C	down	4
18	Track_18	41	0	0	0	0	0	40	0	40	6.578	18	72.705	22.45	0	0.173	0.267	0	0.197	0.062	36.577	39.445	33.117	36.789	1.468	0.0232096	2019-04-12	B4	13°C	up	4
19	Track_19	41	0	0	0	0	0	40	0	40	5.536	19	124.732	44.528	0	0.171	0.375	0	0.154	0.101	37.838	41.388	32.926	37.998	2.093	-0.0903352	2019-04-12	B4	13°C	down	4
20	Track_20	41	0	0	0	0	0	40	0	40	3.021	20	31.336	87.97	0	0.163	0.411	0	0.155	0.091	40.751	43.593	36.872	40.798	1.486	-0.132816	2019-04-12	B4	13°C	down	4
21	Track_21	41	0	0	0	0	0	40	0	40	9.903	21	51.6	45.649	0	0.251	0.331	0	0.255	0.061	41.449	44.631	37.835	41.744	1.676	-0.0645641	2019-04-12	B4	13°C	down	4
22	Track_22	41	0	0	0	0	0	40	0	40	3.732	22	64.035	51.871	0	0.119	0.248	0	0.118	0.065	38.391	40.872	35.988	38.243	1.121	0.0197348	2019-04-12	B4	13°C	up	4
23	Track_23	41	0	0	0	0	0	40	0	40	6.02	23	68.308	48.411	0	0.164	0.257	0	0.17	0.05	37.783	41.766	33.873	37.886	1.643	-0.0744267	2019-04-12	B4	13°C	down	4
24	Track_24	41	0	0	0	0	0	40	0	40	7.357	24	34.338	68.504	0	0.19	0.321	0	0.17	0.079	43.605	47.99	39.045	43.038	2.38	-0.00930052	2019-04-12	B4	13°C	down	4
25	Track_25	31	0	0	0	0	0	30	1	31	5.501	25	111.386	94.171	0	0.189	0.311	0.065	0.205	0.058	38.137	51.33	28.868	35.869	6.657	0.13485	2019-04-12	B4	13°C	up	4
26	Track_26	4	0	0	0	0	0	3	4	7	0.332	26	55.976	90.456	0	0.255	0.394	0.131	0.24	0.132	31.035	33.909	29.318	30.6	1.726	0.0649702	2019-04-12	B4	13°C	up	4
27	Track_27	24	4	1	0	0	0	27	13	40	1.548	27	54.587	90.687	0	0.181	0.382	0	0.142	0.12	32.829	36.029	29.386	32.463	1.728	0.0894	2019-04-12	B4	13°C	up	4
28	Track_28	4	1	1	0	0	0	4	20	24	0.98	28	111.47	67.104	0	0.25	0.282	0.23	0.24	0.027	29.335	30.201	28.941	29.246	0.515	-0.00867851	2019-04-12	B4	13°C	down	4
29	Track_29	3	0	0	0	0	0	2	35	37	0.715	29	106.683	68.586	0	0.359	0.367	0.35	0.367	0.012	32.161	36.416	29.258	30.809	3.075	0.1019	2019-04-12	B4	13°C	up	4
30	Track_30	5	0	0	0	0	0	4	36	40	0.959	30	84.418	23.018	0	0.261	0.375	0	0.338	0.175	30.901	33.483	30.047	30.109	1.323	0.0235	2019-04-12	B4	13°C	up	4
